# Supplementary material
Source: publisher figshare collection journal article supplement (https://tandf.figshare.com/articles/dataset/_/7477601)
Supplement: Supplementary file 1 [file 2]

Archive with 5 entries (5 files):
- ibmk_a_1508308_sm7121.pdf
- ibmk_a_1508308_sm7120.pdf
- ibmk_a_1508308_sm7119.pdf
- ibmk_a_1508308_sm7118.pdf
- ibmk_a_1508308_sm7117.pdf
