# Supplementary material
Source: publisher figshare collection journal article supplement (https://tandf.figshare.com/articles/dataset/_/7477601)
Supplement: Supplementary file 1 [file 2 › ibmk_a_1508308_sm7117.pdf]

Supplemental Table S1. Mmu-miR-183-5p *in silico* predicted targets.

| TARGET GENE | GENE DESCRIPTION                                                                       | VALIDATION | DIANA | MIRANDA | MIRBRIDGE | PICTAR | PITA | RNA22 | TARGETSCAN | TOTAL_HIT |
|-------------|----------------------------------------------------------------------------------------|------------|-------|---------|-----------|--------|------|-------|------------|-----------|
| AP3M1       | adaptor-related protein complex 3, mu 1 subunit                                        |            | V     | V       | V         | V      | V    | V     | V          | 7         |
| BTG1        | B-cell translocation gene 1, anti-proliferative                                        |            | V     | V       | V         | V      | V    | V     | V          | 7         |
| CLCN3       | chloride channel, voltage-sensitive 3                                                  |            | V     | V       | V         | V      | V    | V     | V          | 7         |
| CTDSPL      | CTD (carboxy-terminal domain, RNA polymerase II, polypeptide A) small phosphatase-like |            | V     | V       | V         | V      | V    | V     | V          | 7         |
| DUSP10      | dual specificity phosphatase 10                                                        |            | V     | V       | V         | V      | V    | V     | V          | 7         |
| MAP3K4      | mitogen-activated protein kinase kinase kinase 4                                       |            | V     | V       | V         | V      | V    | V     | V          | 7         |
| PDCD4       | programmed cell death 4 (neoplastic transformation inhibitor)                          |            | V     | V       | V         | V      | V    | V     | V          | 7         |
| PPP2R5C     | protein phosphatase 2, regulatory subunit B', gamma                                    |            | V     | V       | V         | V      | V    | V     | V          | 7         |
| PTPN4       | protein tyrosine phosphatase, non-receptor type 4 (megakaryocyte)                      |            | V     | V       | V         | V      | V    | V     | V          | 7         |
| EZR         | ezrin                                                                                  | V          | V     |         | V         | V      |      | V     | V          | 6         |
| FOXO1       | forkhead box O1                                                                        | V          | V     |         | V         | V      | V    |       | V          | 6         |
| ANKRD13C    | ankyrin repeat domain 13C                                                              |            | V     | V       |           | V      | V    | V     | V          | 6         |
| ARHGAP6     | Rho GTPase activating protein 6                                                        |            | V     | V       | V         | V      | V    | V     |            | 6         |
| BACH2       | BTB and CNC homology 1, basic leucine zipper transcription factor 2                    |            | V     | V       |           | V      | V    | V     | V          | 6         |
| BNIP3L      | BCL2/adenovirus E1B 19kDa interacting protein 3-like                                   |            | V     | V       | V         | V      | V    |       | V          | 6         |
| BRMS1L      | breast cancer metastasis-suppressor 1-like                                             |            | V     | V       | V         | V      | V    |       | V          | 6         |
| CDK5R1      | cyclin-dependent kinase 5, regulatory subunit 1 (p35)                                  |            | V     | V       | V         | V      | V    |       | V          | 6         |
| CTDSP1      | CTD (carboxy-terminal domain, RNA polymerase II, polypeptide A) small phosphatase 1    |            | V     | V       | V         | V      | V    |       | V          | 6         |
| DCX         | doublecortin                                                                           |            | V     | V       | V         | V      | V    |       | V          | 6         |
| ENAH        | enabled homolog (Drosophila)                                                           |            | V     | V       | V         | V      | V    |       | V          | 6         |
| EPHA4       | EPH receptor A4                                                                        |            | V     | V       | V         | V      | V    |       | V          | 6         |
| FOXP1       | forkhead box P1                                                                        |            | V     | V       | V         | V      | V    |       | V          | 6         |
| IDH2        | isocitrate dehydrogenase 2 (NADP+), mitochondrial                                      |            | V     | V       | V         | V      | V    |       | V          | 6         |
| IRS1        | insulin receptor substrate 1                                                           |            | V     | V       | V         | V      | V    | V     |            | 6         |
| KCNK10      | potassium channel, subfamily K, member 10                                              |            | V     | V       |           | V      | V    | V     | V          | 6         |
| LMO3        | LIM domain only 3 (rhombotin-like 2)                                                   |            | V     | V       | V         | V      | V    |       | V          | 6         |
| LRP6        | low density lipoprotein receptor-related protein 6                                     |            | V     | V       |           | V      | V    | V     | V          | 6         |
| MEF2C       | myocyte enhancer factor 2C                                                             |            | V     | V       | V         | V      | V    |       | V          | 6         |
| NR3C1       | nuclear receptor subfamily 3, group C, member 1 (glucocorticoid receptor)              |            | V     | V       | V         | V      | V    |       | V          | 6         |
| OSBPL8      | oxysterol binding protein-like 8                                                       |            | V     | V       |           | V      | V    | V     | V          | 6         |
| PFN2        | profilin 2                                                                             |            | V     | V       | V         | V      | V    |       | V          | 6         |
| JAD2        | Jade Family PHD Finger 2                                                               |            | V     | V       | V         | V      | V    |       | V          | 6         |
| PLAG1       | pleiomorphic adenoma gene 1                                                            |            | V     | V       |           | V      | V    | V     | V          | 6         |
| PPP2CA      | protein phosphatase 2, catalytic subunit, alpha isozyme                                |            | V     | V       | V         | V      | V    |       | V          | 6         |
| PPP2CB      | protein phosphatase 2, catalytic subunit, beta isozyme                                 |            | V     | V       | V         | V      | V    |       | V          | 6         |
| PRKCA       | protein kinase C, alpha                                                                |            | V     | V       | V         | V      | V    |       | V          | 6         |
| SRSF2       | Serine And Arginine Rich Splicing Factor 2                                             |            | V     | V       | V         | V      | V    |       | V          | 6         |
| SLITRK3     | SLIT and NTRK-like family, member 3                                                    |            | V     | V       |           | V      | V    | V     | V          | 6         |

|          |                                                                  |   |   |   |   |   |   |   |   |
|----------|------------------------------------------------------------------|---|---|---|---|---|---|---|---|
| SNX1     | sorting nexin 1                                                  | V | V | V | V | V |   | V | 6 |
| SOCS6    | suppressor of cytokine signaling 6                               | V | V | V | V | V |   | V | 6 |
| STC1     | stanniocalcin 1                                                  | V | V | V | V | V |   | V | 6 |
| TLE4     | transducin-like enhancer of split 4 (E(sp1) homolog, Drosophila) | V | V | V | V | V | V |   | 6 |
| ERP44    | Endoplasmic Reticulum Protein 44                                 | V | V |   | V | V | V | V | 6 |
| UNC13B   | unc-13 homolog B (C. elegans)                                    | V | V | V | V | V |   | V | 6 |
| ZEB2     | zinc finger E-box binding homeobox 2                             | V | V | V |   | V | V | V | 6 |
| ZMYM2    | zinc finger, MYM-type 2                                          | V | V | V | V | V |   | V | 6 |
| ABCA1    | ATP-binding cassette, sub-family A (ABC1), member 1              | V |   | V | V | V |   | V | 5 |
| ABI2     | abl-interactor 2                                                 | V | V | V |   | V |   | V | 5 |
| ACVR2B   | activin A receptor, type IIB                                     | V | V | V |   | V |   | V | 5 |
| AMD1     | adenosylmethionine decarboxylase 1                               | V | V | V | V | V |   |   | 5 |
| ARFGAP2  | ADP-ribosylation factor GTPase activating protein 2              | V | V |   | V | V | V |   | 5 |
| ATP2C1   | ATPase, Ca++ transporting, type 2C, member 1                     | V | V |   |   | V | V | V | 5 |
| BZW1     | basic leucine zipper and W2 domains 1                            | V | V | V |   | V |   | V | 5 |
| SMCO4    | Single-Pass Membrane Protein With Coiled-Coil Domains 4          | V | V |   | V | V |   | V | 5 |
| C16ORF72 | chromosome 16 open reading frame 72                              | V | V |   | V | V |   | V | 5 |
| CACNA1E  | calcium channel, voltage-dependent, R type, alpha 1E subunit     | V | V | V | V |   |   | V | 5 |
| CPEB1    | cytoplasmic polyadenylation element binding protein 1            | V | V |   | V |   | V | V | 5 |
| CSNK1G3  | casein kinase 1, gamma 3                                         | V | V |   | V | V | V |   | 5 |
| CTNNA2   | catenin (cadherin-associated protein), alpha 2                   | V | V | V | V | V |   |   | 5 |
| DAGLA    | diacylglycerol lipase, alpha                                     | V | V |   | V | V |   | V | 5 |
| DMXL1    | Dmx-like 1                                                       | V | V |   |   | V | V | V | 5 |
| EGR1     | early growth response 1                                          | V | V |   | V | V | V |   | 5 |
| EI24     | etoposide induced 2.4                                            | V | V |   |   | V | V | V | 5 |
| AGO2     | Argonaute 2, RISC Catalytic Component                            | V | V |   | V | V |   | V | 5 |
| EML4     | echinoderm microtubule associated protein like 4                 | V | V |   | V | V |   | V | 5 |
| KDM2B    | Lysine Demethylase 2B                                            | V | V | V |   | V |   | V | 5 |
| FOXM2    | forkhead box N2                                                  | V | V |   | V | V |   | V | 5 |
| PIK4B    | Phosphatidylinositol 4-Kinase Beta                               | V |   | V | V | V |   | V | 5 |
| FRMD6    | FERM domain containing 6                                         | V | V |   | V | V |   | V | 5 |
| GATAD2B  | GATA zinc finger domain containing 2B                            | V | V |   | V | V |   | V | 5 |
| GMFB     | glia maturation factor, beta                                     | V | V | V |   | V |   | V | 5 |
| GNG5     | guanine nucleotide binding protein (G protein), gamma 5          | V |   | V | V | V |   | V | 5 |
| GREM2    | gremlin 2, DAN family BMP antagonist                             | V | V | V |   | V |   | V | 5 |
| ICK      | intestinal cell (MAK-like) kinase                                | V | V |   | V | V |   | V | 5 |
| KCNJ14   | potassium inwardly-rectifying channel, subfamily J, member 14    | V | V |   | V | V |   | V | 5 |
| KCNK2    | potassium channel, subfamily K, member 2                         | V | V |   | V | V |   | V | 5 |
| GSE1     | Gse1 Coiled-Coil Protein                                         | V | V |   | V | V |   | V | 5 |
| KIAA0355 | KIAA0355                                                         | V | V |   | V | V |   | V | 5 |
| KIAA0368 | KIAA0368                                                         | V | V | V |   | V |   | V | 5 |

|          |                                                                                   |   |   |   |   |   |   |   |   |
|----------|-----------------------------------------------------------------------------------|---|---|---|---|---|---|---|---|
| LHFPL2   | lipoma HMGIC fusion partner-like 2                                                | V | V |   |   | V | V | V | 5 |
| MAL2     | mal, T-cell differentiation protein 2 (gene/pseudogene)                           | V | V |   | V | V |   | V | 5 |
| MAPK8IP1 | mitogen-activated protein kinase 8 interacting protein 1                          | V |   | V | V | V |   | V | 5 |
| MBNL1    | muscleblind-like splicing regulator 1                                             | V |   |   | V | V | V | V | 5 |
| MTA1     | metastasis associated 1                                                           | V | V | V |   | V |   | V | 5 |
| MTMR6    | myotubularin related protein 6                                                    | V |   | V | V | V |   | V | 5 |
| MXD4     | MAX dimerization protein 4                                                        | V |   | V | V |   | V | V | 5 |
| NCK2     | NCK adaptor protein 2                                                             | V | V | V |   | V |   | V | 5 |
| NR4A2    | nuclear receptor subfamily 4, group A, member 2                                   | V | V | V | V |   |   | V | 5 |
| NTRK2    | neurotrophic tyrosine kinase, receptor, type 2                                    | V | V | V |   |   | V | V | 5 |
| NUDT4    | nudix (nucleoside diphosphate linked moiety X)-type motif 4                       | V | V |   |   | V | V | V | 5 |
| PDE4D    | phosphodiesterase 4D, cAMP-specific                                               | V | V |   | V | V |   | V | 5 |
| PEX19    | peroxisomal biogenesis factor 19                                                  | V | V | V | V |   |   | V | 5 |
| PHF6     | PHD finger protein 6                                                              | V | V |   | V | V | V |   | 5 |
| PKD2     | polycystic kidney disease 2 (autosomal dominant)                                  | V | V | V |   |   | V | V | 5 |
| PKP4     | plakophilin 4                                                                     | V | V |   | V | V |   | V | 5 |
| PRKCB    | protein kinase C, beta                                                            | V | V | V |   | V | V |   | 5 |
| PSEN2    | presenilin 2 (Alzheimer disease 4)                                                | V |   | V | V | V |   | V | 5 |
| RAB8B    | RAB8B, member RAS oncogene family                                                 | V |   | V |   | V | V | V | 5 |
| RALA     | v-ral simian leukemia viral oncogene homolog A (ras related)                      | V | V |   | V | V |   | V | 5 |
| RHOBTB1  | Rho-related BTB domain containing 1                                               | V | V |   | V | V |   | V | 5 |
| RNF138   | ring finger protein 138, E3 ubiquitin protein ligase                              | V | V |   | V | V |   | V | 5 |
| RNF2     | ring finger protein 2                                                             | V | V | V |   | V |   | V | 5 |
| RPS6KA3  | ribosomal protein S6 kinase, 90kDa, polypeptide 3                                 | V | V | V |   | V |   | V | 5 |
| SACS     | spastic ataxia of Charlevoix-Saguenay (sacsin)                                    | V | V |   | V | V |   | V | 5 |
| SCARA3   | scavenger receptor class A, member 3                                              | V | V | V |   | V | V |   | 5 |
| SCYL3    | SCY1-like 3 (S. cerevisiae)                                                       | V |   | V | V | V |   | V | 5 |
| SRSF11   | Serine And Arginine Rich Splicing Factor 11                                       | V | V |   | V | V |   | V | 5 |
| SIN3A    | SIN3 transcription regulator family member A                                      | V | V | V | V | V |   |   | 5 |
| SIRPA    | signal-regulatory protein alpha                                                   | V | V |   |   | V | V | V | 5 |
| SLAIN1   | SLAIN motif family, member 1                                                      | V | V |   | V | V |   | V | 5 |
| SLC35A1  | solute carrier family 35 (CMP-sialic acid transporter), member A1                 | V | V |   | V | V |   | V | 5 |
| SLITRK1  | SLIT and NTRK-like family, member 1                                               | V | V |   | V | V |   | V | 5 |
| SMAD4    | SMAD family member 4                                                              | V | V | V |   | V |   | V | 5 |
| SMPD3    | sphingomyelin phosphodiesterase 3, neutral membrane (neutral sphingomyelinase II) | V | V |   | V | V |   | V | 5 |
| STK38L   | serine/threonine kinase 38 like                                                   | V | V |   | V | V |   | V | 5 |
| TET1     | tet methylcytosine dioxygenase 1                                                  | V | V |   | V | V |   | V | 5 |
| TIAM1    | T-cell lymphoma invasion and metastasis 1                                         | V | V | V |   | V |   | V | 5 |
| TMEM184C | transmembrane protein 184C                                                        | V | V |   |   | V | V | V | 5 |
| TMPO     | thymopoietin                                                                      | V | V | V |   | V |   | V | 5 |
| TMSB4Y   | thymosin beta 4, Y-linked                                                         | V | V |   | V | V |   | V | 5 |

|          |                                                                            |   |   |   |   |   |   |   |   |   |
|----------|----------------------------------------------------------------------------|---|---|---|---|---|---|---|---|---|
| TOMM70A  | translocase of outer mitochondrial membrane 70 homolog A (S. cerevisiae)   |   | V | V |   |   | V | V | V | 5 |
| TRAM1    | translocation associated membrane protein 1                                |   | V | V | V | V | V |   |   | 5 |
| TRIM2    | tripartite motif containing 2                                              |   | V | V | V | V |   |   | V | 5 |
| YPEL5    | yippee-like 5 (Drosophila)                                                 |   | V | V |   | V | V |   | V | 5 |
| ZDHHC6   | zinc finger, DHHC-type containing 6                                        |   | V | V |   | V | V |   | V | 5 |
| ZFPM2    | zinc finger protein, FOG family member 2                                   |   | V | V |   | V | V |   | V | 5 |
| ZFYVE26  | zinc finger, FYVE domain containing 26                                     |   | V | V |   | V | V |   | V | 5 |
| CELSR3   | cadherin, EGF LAG seven-pass G-type receptor 3                             |   |   | V | V | V |   | V | V | 5 |
| CELF2    | CUGBP Elav-Like Family Member 2                                            |   |   | V | V | V | V |   | V | 5 |
| PPP2R2A  | protein phosphatase 2, regulatory subunit B, alpha                         |   |   | V | V | V | V |   | V | 5 |
| RUNX1T1  | runt-related transcription factor 1; translocated to, 1 (cyclin D-related) | V | V |   | V | V |   |   |   | 4 |
| ACVR2A   | activin A receptor, type IIA                                               |   | V | V | V |   | V |   |   | 4 |
| AGPAT5   | 1-acylglycerol-3-phosphate O-acyltransferase 5                             |   | V | V |   |   | V |   | V | 4 |
| AJAP1    | adherens junctions associated protein 1                                    |   | V |   |   | V | V |   | V | 4 |
| AKAP12   | A kinase (PRKA) anchor protein 12                                          |   | V |   |   |   | V | V | V | 4 |
| AP3M2    | adaptor-related protein complex 3, mu 2 subunit                            |   | V | V | V |   |   | V |   | 4 |
| APPBP2   | amyloid beta precursor protein (cytoplasmic tail) binding protein 2        |   | V | V |   |   | V | V |   | 4 |
| ARHGAP18 | Rho GTPase activating protein 18                                           |   | V | V |   |   | V |   | V | 4 |
| ARHGEF18 | Rho/Rac guanine nucleotide exchange factor (GEF) 18                        |   | V |   | V | V |   |   | V | 4 |
| ASTN1    | astrotactin 1                                                              |   | V | V | V |   |   | V |   | 4 |
| ATRN     | attractin                                                                  |   | V | V |   |   |   | V | V | 4 |
| AUTS2    | autism susceptibility candidate 2                                          |   | V | V |   |   | V |   | V | 4 |
| B3GNT2   | UDP-GlcNAc:betaGal beta-1,3-N-acetylglucosaminyltransferase 2              |   | V | V | V | V |   |   |   | 4 |
| BNC2     | basonuclin 2                                                               |   | V | V |   | V |   |   | V | 4 |
| CELF6    | CUGBP Elav-Like Family Member 6                                            |   | V |   |   | V | V |   | V | 4 |
| CNOT6L   | CCR4-NOT transcription complex, subunit 6-like                             |   | V | V |   |   | V |   | V | 4 |
| COLEC12  | collectin sub-family member 12                                             |   | V | V | V |   | V |   |   | 4 |
| COMMD7   | COMM domain containing 7                                                   |   | V | V |   |   |   | V | V | 4 |
| CPEB2    | cytoplasmic polyadenylation element binding protein 2                      |   | V | V |   | V |   |   | V | 4 |
| CX3CL1   | chemokine (C-X3-C motif) ligand 1                                          |   | V | V |   |   | V |   | V | 4 |
| CYYR1    | cysteine/tyrosine-rich 1                                                   |   | V | V |   |   | V |   | V | 4 |
| DGCR2    | DiGeorge syndrome critical region gene 2                                   |   | V |   | V | V |   |   | V | 4 |
| DPP8     | dipeptidyl-peptidase 8                                                     |   | V | V |   |   | V |   | V | 4 |
| DTNA     | dystrobrevin, alpha                                                        |   | V |   |   | V | V |   | V | 4 |
| EEF2     | eukaryotic translation elongation factor 2                                 |   | V | V |   |   | V |   | V | 4 |
| EPHA7    | EPH receptor A7                                                            |   | V | V | V |   | V |   |   | 4 |
| ERBB2IP  | erbb2 interacting protein                                                  |   | V | V |   |   | V |   | V | 4 |
| FAT1     | FAT atypical cadherin 1                                                    |   | V | V | V |   | V |   |   | 4 |
| FCHO2    | FCH domain only 2                                                          |   | V | V |   |   | V |   | V | 4 |
| FGF9     | fibroblast growth factor 9                                                 |   | V |   | V | V |   |   | V | 4 |
| ARHGEF37 | Rho guanine nucleotide exchange factor 37                                  |   | V | V |   |   | V |   | V | 4 |

|          |                                                                                              |   |   |   |   |   |   |   |   |
|----------|----------------------------------------------------------------------------------------------|---|---|---|---|---|---|---|---|
| FLRT3    | fibronectin leucine rich transmembrane protein 3                                             | V |   |   | V |   | V | V | 4 |
| FOXA1    | forkhead box A1                                                                              | V | V |   |   | V | V |   | 4 |
| GALNTL6  | UDP-N-acetyl-alpha-D-galactosamine:polypeptide N-acetylgalactosaminyltransferase-like 6      | V | V |   |   | V |   | V | 4 |
| GNG12    | guanine nucleotide binding protein (G protein), gamma 12                                     | V | V | V |   |   |   | V | 4 |
| GPAM     | glycerol-3-phosphate acyltransferase, mitochondrial                                          | V | V |   |   | V |   | V | 4 |
| GTF2H1   | general transcription factor IIH, polypeptide 1, 62kDa                                       | V | V | V |   | V |   |   | 4 |
| HBEGF    | heparin-binding EGF-like growth factor                                                       | V | V |   | V | V |   |   | 4 |
| HECTD2   | HECT domain containing E3 ubiquitin protein ligase 2                                         | V | V |   | V | V |   |   | 4 |
| HLF      | hepatic leukemia factor                                                                      | V | V |   |   | V |   | V | 4 |
| HSPA13   | heat shock protein 70kDa family, member 13                                                   | V | V | V |   |   | V |   | 4 |
| ICA1     | islet cell autoantigen 1, 69kDa                                                              | V | V |   |   | V |   | V | 4 |
| ING3     | inhibitor of growth family, member 3                                                         | V | V |   | V | V |   |   | 4 |
| IPPK     | inositol 1,3,4,5,6-pentakisphosphate 2-kinase                                                | V | V |   |   | V |   | V | 4 |
| KIAA0101 | KIAA0101                                                                                     | V | V |   |   | V |   | V | 4 |
| KIF2A    | kinesin heavy chain member 2A                                                                | V | V |   |   | V |   | V | 4 |
| KLHL28   | kelch-like family member 28                                                                  | V | V |   |   | V |   | V | 4 |
| KLHL3    | kelch-like family member 3                                                                   | V | V |   |   | V |   | V | 4 |
| L3MBTL3  | l(3)mbt-like 3 (Drosophila)                                                                  | V | V |   |   | V |   | V | 4 |
| LAPTM4A  | lysosomal protein transmembrane 4 alpha                                                      | V | V |   | V | V |   |   | 4 |
| LPHN1    | latrophilin 1                                                                                | V |   | V |   | V |   | V | 4 |
| LRRC1    | leucine rich repeat containing 1                                                             | V | V |   |   | V |   | V | 4 |
| MACROD2  | MACRO domain containing 2                                                                    | V | V |   |   | V |   | V | 4 |
| TAB3     | TGF-Beta Activated Kinase 1 And MAP3K7 Binding Protein 3                                     | V | V |   |   | V |   | V | 4 |
| MAPK4    | mitogen-activated protein kinase 4                                                           | V | V |   |   | V |   | V | 4 |
| MYO1B    | myosin IB                                                                                    | V | V |   |   | V |   | V | 4 |
| NCAM1    | neural cell adhesion molecule 1                                                              | V | V | V |   | V |   |   | 4 |
| NEFL     | neurofilament, light polypeptide                                                             | V | V |   |   | V |   | V | 4 |
| NFAT5    | nuclear factor of activated T-cells 5, tonicity-responsive                                   | V | V | V |   | V |   |   | 4 |
| NFE2L1   | nuclear factor, erythroid 2-like 1                                                           | V |   | V | V |   |   | V | 4 |
| NFYC     | nuclear transcription factor Y, gamma                                                        | V |   | V | V |   | V |   | 4 |
| PAM      | peptidylglycine alpha-amidating monooxygenase                                                | V | V | V | V |   |   |   | 4 |
| PCGF5    | polycomb group ring finger 5                                                                 | V | V |   |   | V |   | V | 4 |
| PIM1     | pim-1 oncogene                                                                               | V | V |   | V | V |   |   | 4 |
| PLCXD3   | phosphatidylinositol-specific phospholipase C, X domain containing 3                         | V |   |   | V |   | V | V | 4 |
| PLEKHA3  | pleckstrin homology domain containing, family A (phosphoinositide binding specific) member 3 | V | V | V |   | V |   |   | 4 |
| PLEKHA5  | pleckstrin homology domain containing, family A member 5                                     | V |   |   | V | V |   | V | 4 |
| PNOC     | prepronociceptin                                                                             | V |   | V | V |   | V |   | 4 |
| POLR2D   | polymerase (RNA) II (DNA directed) polypeptide D                                             | V | V | V |   | V |   |   | 4 |
| PPM1E    | protein phosphatase, Mg2+/Mn2+ dependent, 1E                                                 | V | V |   | V | V |   |   | 4 |
| PRICKLE2 | prickle homolog 2 (Drosophila)                                                               | V | V |   |   | V | V |   | 4 |
| PRKACB   | protein kinase, cAMP-dependent, catalytic, beta                                              | V | V | V |   | V |   |   | 4 |

|           |                                                                                              |   |   |   |   |   |   |   |   |
|-----------|----------------------------------------------------------------------------------------------|---|---|---|---|---|---|---|---|
| PRKCI     | protein kinase C, iota                                                                       | V |   | V |   | V |   | V | 4 |
| PSD3      | pleckstrin and Sec7 domain containing 3                                                      | V | V |   |   |   | V | V | 4 |
| PTDSS1    | phosphatidylserine synthase 1                                                                | V | V |   |   | V |   | V | 4 |
| RAB11FIP4 | RAB11 family interacting protein 4 (class II)                                                | V |   |   |   | V | V | V | 4 |
| RCN2      | reticulocalbin 2, EF-hand calcium binding domain                                             | V | V |   |   | V | V |   | 4 |
| REPS2     | RALBP1 associated Eps domain containing 2                                                    | V | V |   |   | V |   | V | 4 |
| REV1      | REV1, polymerase (DNA directed)                                                              | V | V |   |   | V |   | V | 4 |
| RHOB      | ras homolog family member B                                                                  | V |   | V | V |   |   | V | 4 |
| ROBO2     | roundabout, axon guidance receptor, homolog 2 (Drosophila)                                   | V | V |   |   | V |   | V | 4 |
| RORC      | RAR-related orphan receptor C                                                                | V |   | V |   | V |   | V | 4 |
| SEL1L     | sel-1 suppressor of lin-12-like (C. elegans)                                                 | V | V |   |   | V |   | V | 4 |
| SEMA6D    | sema domain, transmembrane domain (TM), and cytoplasmic domain, (semaphorin) 6D              | V | V |   | V | V |   |   | 4 |
| SESN1     | sestrin 1                                                                                    | V | V |   |   | V |   | V | 4 |
| SREK1IP1  | SREK1 Interacting Protein 1                                                                  | V | V |   |   | V |   | V | 4 |
| SLC1A2    | solute carrier family 1 (glial high affinity glutamate transporter), member 2                | V | V |   |   |   | V | V | 4 |
| SLC30A8   | solute carrier family 30 (zinc transporter), member 8                                        | V | V |   |   | V |   | V | 4 |
| SLC44A1   | solute carrier family 44 (choline transporter), member 1                                     | V | V |   |   | V | V |   | 4 |
| SLC6A6    | solute carrier family 6 (neurotransmitter transporter), member 6                             | V |   |   |   | V | V | V | 4 |
| SNCB      | synuclein, beta                                                                              | V | V | V | V |   |   |   | 4 |
| SOX6      | SRY (sex determining region Y)-box 6                                                         | V | V |   | V | V |   |   | 4 |
| SPATS2    | spermatogenesis associated, serine-rich 2                                                    | V | V |   |   | V |   | V | 4 |
| SSRP1     | structure specific recognition protein 1                                                     | V |   | V | V |   | V |   | 4 |
| TCF12     | transcription factor 12                                                                      | V |   |   | V | V |   | V | 4 |
| TCF7L2    | transcription factor 7-like 2 (T-cell specific, HMG-box)                                     | V | V | V |   | V |   |   | 4 |
| TPM1      | tropomyosin 1 (alpha)                                                                        | V | V | V |   | V |   |   | 4 |
| TTC7B     | tetratricopeptide repeat domain 7B                                                           | V | V |   |   | V |   | V | 4 |
| USP47     | ubiquitin specific peptidase 47                                                              | V | V |   | V |   |   | V | 4 |
| VAPB      | VAMP (vesicle-associated membrane protein)-associated protein B and C                        | V |   | V | V |   | V |   | 4 |
| VPS37A    | vacuolar protein sorting 37 homolog A (S. cerevisiae)                                        | V | V |   | V | V |   |   | 4 |
| VSX2      | visual system homeobox 2                                                                     | V | V |   |   | V |   | V | 4 |
| XKR6      | XK, Kell blood group complex subunit-related family, member 6                                | V | V |   | V | V |   |   | 4 |
| XPOT      | exportin, tRNA                                                                               | V | V |   |   | V |   | V | 4 |
| YAF2      | YY1 associated factor 2                                                                      | V | V |   |   | V |   | V | 4 |
| YES1      | v-yes-1 Yamaguchi sarcoma viral oncogene homolog 1                                           | V | V | V | V |   |   |   | 4 |
| ZNF592    | zinc finger protein 592                                                                      | V | V |   |   | V |   | V | 4 |
| ARHGAP21  | Rho GTPase activating protein 21                                                             |   | V |   | V | V |   | V | 4 |
| CFL2      | cofilin 2 (muscle)                                                                           |   | V | V | V |   |   | V | 4 |
| CSMD1     | CUB and Sushi multiple domains 1                                                             |   | V |   |   | V | V | V | 4 |
| ITGB1     | integrin, beta 1 (fibronectin receptor, beta polypeptide, antigen CD29 includes MDF2, MSK12] |   | V | V | V | V |   |   | 4 |
| PLAGL2    | pleiomorphic adenoma gene-like 2                                                             |   | V |   | V | V |   | V | 4 |
| PLCB4     | phospholipase C, beta 4                                                                      |   | V |   | V | V |   | V | 4 |

|          |                                                      |   |   |   |   |   |   |   |   |
|----------|------------------------------------------------------|---|---|---|---|---|---|---|---|
| TMSB4X   | thymosin beta 4, X-linked                            |   | V |   | V | V |   | V | 4 |
| VDAC1    | voltage-dependent anion channel 1                    |   | V |   | V | V |   |   | 4 |
| PDCD6    | programmed cell death 6                              |   |   | V | V |   | V | V | 4 |
| ABAT     | 4-aminobutyrate aminotransferase                     | V | V |   |   |   | V |   | 3 |
| ABHD13   | abhydrolase domain containing 13                     | V |   |   | V |   |   | V | 3 |
| ACVR1B   | activin A receptor, type IB                          | V | V |   |   | V |   |   | 3 |
| AFF4     | AF4/FMR2 family, member 4                            | V | V |   |   |   |   | V | 3 |
| ALAD     | aminolevulinate dehydratase                          | V | V | V |   |   |   |   | 3 |
| ALOX15   | arachidonate 15-lipoxygenase                         | V | V |   |   | V |   |   | 3 |
| AMMECR1L | AMMECR1-like                                         | V | V |   |   | V |   |   | 3 |
| AMOT     | angiomotin                                           | V | V | V |   |   |   |   | 3 |
| ANKRD50  | ankyrin repeat domain 50                             | V |   |   |   | V |   | V | 3 |
| ARHGAP26 | Rho GTPase activating protein 26                     | V | V |   |   |   |   | V | 3 |
| ARID4B   | AT rich interactive domain 4B (RBP1-like)            | V |   | V | V |   |   |   | 3 |
| ARL8B    | ADP-ribosylation factor-like 8B                      | V | V |   |   | V |   |   | 3 |
| ATP10B   | ATPase, class V, type 10B                            | V | V |   |   |   | V |   | 3 |
| BAGE3    | B melanoma antigen family, member 3                  | V |   |   |   | V |   | V | 3 |
| BAZ1B    | bromodomain adjacent to zinc finger domain, 1B       | V | V |   |   |   |   | V | 3 |
| BCL11B   | B-cell CLL/lymphoma 11B (zinc finger protein)        | V |   |   | V |   |   | V | 3 |
| BCL2L11  | BCL2-like 11 (apoptosis facilitator)                 | V |   | V | V |   |   |   | 3 |
| BCL6     | B-cell CLL/lymphoma 6                                | V |   | V | V |   |   |   | 3 |
| BMI1     | BMI1 polycomb ring finger oncogene                   | V |   |   | V |   |   | V | 3 |
| SUCO     | SUN Domain Containing Ossification Factor            | V | V |   |   | V |   |   | 3 |
| C5ORF24  | chromosome 5 open reading frame 24                   | V | V |   |   | V |   |   | 3 |
| NADK2    | NAD Kinase 2, Mitochondrial                          | V |   |   | V |   | V |   | 3 |
| SMIM8    | Small Integral Membrane Protein 8                    | V | V |   |   |   |   | V | 3 |
| CACNB4   | calcium channel, voltage-dependent, beta 4 subunit   | V |   | V | V |   |   |   | 3 |
| CALCB    | calcitonin-related polypeptide beta                  | V |   | V |   | V |   |   | 3 |
| CAMK2D   | calcium/calmodulin-dependent protein kinase II delta | V | V |   |   |   |   | V | 3 |
| CCND2    | cyclin D2                                            | V |   | V | V |   |   |   | 3 |
| CD164    | CD164 molecule, sialomucin                           | V | V |   |   | V |   |   | 3 |
| CD28     | CD28 molecule                                        | V | V |   |   |   | V |   | 3 |
| CDC42EP3 | CDC42 effector protein (Rho GTPase binding) 3        | V |   | V |   |   | V |   | 3 |
| CDH9     | cadherin 9, type 2 (T1-cadherin)                     | V |   |   | V |   | V |   | 3 |
| CLEC3A   | C-type lectin domain family 3, member A              | V | V |   |   |   | V |   | 3 |
| CLEC7A   | C-type lectin domain family 7, member A              | V | V |   |   |   | V |   | 3 |
| CLIP1    | CAP-GLY domain containing linker protein 1           | V | V |   |   | V |   |   | 3 |
| CNOT6    | CCR4-NOT transcription complex, subunit 6            | V | V |   |   | V |   |   | 3 |
| CNTN5    | contactin 5                                          | V | V |   |   | V |   |   | 3 |
| CNTNAP2  | contactin associated protein-like 2                  | V |   | V | V |   |   |   | 3 |
| COL12A1  | collagen, type XII, alpha 1                          | V | V |   |   |   | V |   | 3 |

|           |                                                                                          |   |   |   |   |   |   |   |
|-----------|------------------------------------------------------------------------------------------|---|---|---|---|---|---|---|
| CPM       | carboxypeptidase M                                                                       | V |   | V |   | V |   | 3 |
| CREM      | cAMP responsive element modulator                                                        | V | V |   | V |   |   | 3 |
| CSNK1G1   | casein kinase 1, gamma 1                                                                 | V | V |   |   |   | V | 3 |
| CUX2      | cut-like homeobox 2                                                                      | V | V |   |   | V |   | 3 |
| CYB561D1  | cytochrome b561 family, member D1                                                        | V | V |   |   | V |   | 3 |
| CYCS      | cytochrome c, somatic                                                                    | V |   | V |   |   | V | 3 |
| DAP       | death-associated protein                                                                 | V |   | V | V |   |   | 3 |
| DCHS1     | dachsous cadherin-related 1                                                              | V | V |   |   | V |   | 3 |
| DDIT4     | DNA-damage-inducible transcript 4                                                        | V | V |   |   |   | V | 3 |
| EIF4A2    | eukaryotic translation initiation factor 4A2                                             | V |   | V | V |   |   | 3 |
| ENY2      | enhancer of yellow 2 homolog (Drosophila)                                                | V |   | V | V |   |   | 3 |
| EVI5      | ecotropic viral integration site 5                                                       | V | V |   |   |   | V | 3 |
| EXOC8     | exocyst complex component 8                                                              | V | V |   |   |   | V | 3 |
| FAM175B   | family with sequence similarity 175, member B                                            | V | V |   | V |   |   | 3 |
| FAM91A1   | family with sequence similarity 91, member A1                                            | V | V |   |   | V |   | 3 |
| FBXO30    | F-box protein 30                                                                         | V |   |   | V |   | V | 3 |
| FCHSD2    | FCH and double SH3 domains 2                                                             | V | V |   |   | V |   | 3 |
| FKBP1A    | FK506 binding protein 1A, 12kDa                                                          | V |   | V | V |   |   | 3 |
| FNDC3B    | fibronectin type III domain containing 3B                                                | V |   |   | V |   | V | 3 |
| FRS2      | fibroblast growth factor receptor substrate 2                                            | V | V |   |   | V |   | 3 |
| FRYL      | FRY-like                                                                                 | V | V |   |   | V |   | 3 |
| G6PC      | glucose-6-phosphatase, catalytic subunit                                                 | V | V | V |   |   |   | 3 |
| GABRB2    | gamma-aminobutyric acid (GABA) A receptor, beta 2                                        | V | V |   |   | V |   | 3 |
| GARNL3    | GTPase activating Rap/RanGAP domain-like 3                                               | V | V |   |   | V |   | 3 |
| GCLM      | glutamate-cysteine ligase, modifier subunit                                              | V | V |   |   |   | V | 3 |
| GDA       | guanine deaminase                                                                        | V | V |   |   |   | V | 3 |
| GJA3      | gap junction protein, alpha 3, 46kDa                                                     | V | V |   |   | V |   | 3 |
| GLDC      | glycine dehydrogenase (decarboxylating)                                                  | V | V |   |   | V |   | 3 |
| GNAQ      | guanine nucleotide binding protein (G protein), q polypeptide                            | V |   |   |   |   | V | 3 |
| GNB1      | guanine nucleotide binding protein (G protein), beta polypeptide 1                       | V |   | V | V |   |   | 3 |
| GNG4      | guanine nucleotide binding protein (G protein), gamma 4                                  | V |   | V |   | V |   | 3 |
| GOLGA6B   | golgin A6 family, member B                                                               | V | V |   |   | V |   | 3 |
| GOLGA7    | golgin A7                                                                                | V |   |   |   | V | V | 3 |
| GPR3      | G protein-coupled receptor 3                                                             | V | V |   |   | V |   | 3 |
| GRIK2     | glutamate receptor, ionotropic, kainate 2                                                | V | V |   |   | V |   | 3 |
| GRM1      | glutamate receptor, metabotropic 1                                                       | V | V |   |   | V |   | 3 |
| HCG_18385 |                                                                                          | V |   |   |   | V |   | 3 |
| HLA-DMB   | major histocompatibility complex, class II, DM beta                                      | V | V | V |   |   |   | 3 |
| HNRNPD    | heterogeneous nuclear ribonucleoprotein D (AU-rich element RNA binding protein 1, 37kDa) | V | V |   |   |   | V | 3 |
| HOMER1    | homer homolog 1 (Drosophila)                                                             | V | V |   |   | V |   | 3 |
| HS3ST1    | heparan sulfate (glucosamine) 3-O-sulfotransferase 1                                     | V |   |   | V |   | V | 3 |

|          |                                                                                                           |   |   |   |   |   |   |   |
|----------|-----------------------------------------------------------------------------------------------------------|---|---|---|---|---|---|---|
| IDS      | iduronate 2-sulfatase                                                                                     | V | V |   |   | V |   | 3 |
| IGF1     | insulin-like growth factor 1 (somatomedin C)                                                              | V | V |   |   | V |   | 3 |
| IL12B    | interleukin 12B (natural killer cell stimulatory factor 2, cytotoxic lymphocyte maturation factor 2, p40) | V | V | V |   |   |   | 3 |
| INADL    | InaD-like (Drosophila)                                                                                    | V | V | V |   |   |   | 3 |
| INSIG1   | insulin induced gene 1                                                                                    | V |   | V |   |   | V | 3 |
| ITGB8    | integrin, beta 8                                                                                          | V | V |   |   |   | V | 3 |
| KCND2    | potassium voltage-gated channel, Shal-related subfamily, member 2                                         | V | V |   |   | V |   | 3 |
| KCNMB1   | potassium large conductance calcium-activated channel, subfamily M, beta member 1                         | V |   | V |   | V |   | 3 |
| CEP170B  | Centrosomal Protein 170B                                                                                  | V |   |   |   | V | V | 3 |
| KIAA1024 | KIAA1024                                                                                                  | V | V |   |   |   | V | 3 |
| KIAA1468 | KIAA1468                                                                                                  | V | V |   |   | V |   | 3 |
| KIAA2018 | KIAA2018                                                                                                  | V | V |   |   |   | V | 3 |
| KLHL24   | kelch-like family member 24                                                                               | V | V |   |   |   | V | 3 |
| KPNA4    | karyopherin alpha 4 (importin alpha 3)                                                                    | V |   |   | V | V |   | 3 |
| CERS6    | Ceramide Synthase 6                                                                                       | V |   |   |   | V | V | 3 |
| LHX6     | LIM homeobox 6                                                                                            | V | V |   |   | V |   | 3 |
| LPPR2    | lipid phosphate phosphatase-related protein type 2                                                        | V | V |   |   |   | V | 3 |
| LRP1B    | low density lipoprotein receptor-related protein 1B                                                       | V |   | V | V |   |   | 3 |
| MAL      | mal, T-cell differentiation protein                                                                       | V |   | V |   | V |   | 3 |
| MAN1A2   | mannosidase, alpha, class 1A, member 2                                                                    | V | V |   |   | V |   | 3 |
| MAP4K5   | mitogen-activated protein kinase kinase kinase kinase 5                                                   | V | V |   |   | V |   | 3 |
| MAPKAPK2 | mitogen-activated protein kinase-activated protein kinase 2                                               | V | V |   |   | V |   | 3 |
| MECP2    | methyl CpG binding protein 2 (Rett syndrome)                                                              | V | V |   |   |   | V | 3 |
| MED21    | mediator complex subunit 21                                                                               | V | V | V |   |   |   | 3 |
| MIB1     | mindbomb E3 ubiquitin protein ligase 1                                                                    | V | V |   |   | V |   | 3 |
| MIER1    | mesoderm induction early response 1, transcriptional regulator                                            | V | V |   |   | V |   | 3 |
| MKL2     | MKL/myocardin-like 2                                                                                      | V |   |   | V |   | V | 3 |
| MORC3    | MORC family CW-type zinc finger 3                                                                         | V |   | V | V |   |   | 3 |
| MRC2     | mannose receptor, C type 2                                                                                | V | V |   |   | V |   | 3 |
| MUC1     | mucin 1, cell surface associated                                                                          | V | V |   |   | V |   | 3 |
| NCAN     | neurocan                                                                                                  | V | V |   |   | V |   | 3 |
| NCDN     | neurochondrin                                                                                             | V | V |   |   | V |   | 3 |
| NCKAP1   | NCK-associated protein 1                                                                                  | V |   | V | V |   |   | 3 |
| NELL1    | NEL-like 1 (chicken)                                                                                      | V | V |   |   | V |   | 3 |
| NFKB1    | nuclear factor of kappa light polypeptide gene enhancer in B-cells 1                                      | V | V | V |   |   |   | 3 |
| NOTCH1   | notch 1                                                                                                   | V | V |   |   | V |   | 3 |
| NRXN3    | neurexin 3                                                                                                | V |   |   | V | V |   | 3 |
| NSL1     | NSL1, MIS12 kinetochore complex component                                                                 | V | V | V |   |   |   | 3 |
| NTN4     | netrin 4                                                                                                  | V | V |   |   | V |   | 3 |
| OPCML    | opioid binding protein/cell adhesion molecule-like                                                        | V | V |   |   | V |   | 3 |
| ORC2     | Origin Recognition Complex Subunit 2                                                                      | V | V | V |   |   |   | 3 |

|            |                                                                                                               |   |   |   |   |   |   |   |   |
|------------|---------------------------------------------------------------------------------------------------------------|---|---|---|---|---|---|---|---|
| OSBPL1A    | oxysterol binding protein-like 1A                                                                             | V | V |   |   |   | V |   | 3 |
| P4HA2      | prolyl 4-hydroxylase, alpha polypeptide II                                                                    | V | V |   |   |   | V |   | 3 |
| PALLD      | palladin, cytoskeletal associated protein                                                                     | V | V | V |   |   |   |   | 3 |
| PHF3       | PHD finger protein 3                                                                                          | V |   |   |   | V |   | V | 3 |
| PHLDB2     | pleckstrin homology-like domain, family B, member 2                                                           | V | V |   | V |   |   |   | 3 |
| PICALM     | phosphatidylinositol binding clathrin assembly protein                                                        | V | V |   |   | V |   |   | 3 |
| PKNOX2     | PBX/knotted 1 homeobox 2                                                                                      | V |   |   | V |   |   | V | 3 |
| PNPT1      | polyribonucleotide nucleotidyltransferase 1                                                                   | V | V |   |   |   |   | V | 3 |
| POLR2C     | polymerase (RNA) II (DNA directed) polypeptide C, 33kDa                                                       | V |   | V |   |   | V |   | 3 |
| PPP1R14B   | protein phosphatase 1, regulatory (inhibitor) subunit 14B                                                     | V | V |   |   | V |   |   | 3 |
| PPP1R3C    | protein phosphatase 1, regulatory subunit 3C                                                                  | V | V | V |   |   |   |   | 3 |
| PPP1R8     | protein phosphatase 1, regulatory subunit 8                                                                   | V | V | V |   |   |   |   | 3 |
| PRKCQ      | protein kinase C, theta                                                                                       | V | V | V |   |   |   |   | 3 |
| PRKRA      | protein kinase, interferon-inducible double stranded RNA dependent activator                                  | V | V |   |   |   | V |   | 3 |
| PRKRIR     | protein-kinase, interferon-inducible double stranded RNA dependent inhibitor, repressor of (P58 repressor)    | V | V | V |   |   |   |   | 3 |
| PRUNE2     | prune homolog 2 (Drosophila)                                                                                  | V | V |   |   |   |   | V | 3 |
| RAB35      | RAB35, member RAS oncogene family                                                                             | V | V |   |   | V |   |   | 3 |
| RAD50      | RAD50 homolog (S. cerevisiae)                                                                                 | V |   | V |   |   |   | V | 3 |
| RBM8A      | RNA binding motif protein 8A                                                                                  | V |   | V |   |   | V |   | 3 |
| RGS14      | regulator of G-protein signaling 14                                                                           | V | V |   |   | V |   |   | 3 |
| RIMBP2     | RIMS binding protein 2                                                                                        | V |   |   |   | V |   | V | 3 |
| RPE        | ribulose-5-phosphate-3-epimerase                                                                              | V | V | V |   |   |   |   | 3 |
| RREB1      | ras responsive element binding protein 1                                                                      | V |   | V |   |   |   | V | 3 |
| RSBN1      | round spermatid basic protein 1                                                                               | V |   | V | V |   |   |   | 3 |
| RYBP       | RING1 and YY1 binding protein                                                                                 | V | V |   |   | V |   |   | 3 |
| SAFB       | scaffold attachment factor B                                                                                  | V |   |   | V |   |   | V | 3 |
| SENP1      | SUMO1/sentrin specific peptidase 1                                                                            | V | V |   |   |   | V |   | 3 |
| SEPT7      | septin 7                                                                                                      | V |   |   | V |   |   | V | 3 |
| SERP1      | stress-associated endoplasmic reticulum protein 1                                                             | V | V | V |   |   |   |   | 3 |
| SETD7      | SET domain containing (lysine methyltransferase) 7                                                            | V | V |   |   |   | V |   | 3 |
| SF1        | splicing factor 1                                                                                             | V | V | V |   |   |   |   | 3 |
| SLC22A23   | solute carrier family 22, member 23                                                                           | V |   | V | V |   |   |   | 3 |
| SLC37A2    | solute carrier family 37 (glucose-6-phosphate transporter), member 2                                          | V | V |   |   |   | V |   | 3 |
| SLC4A4     | solute carrier family 4 (sodium bicarbonate cotransporter), member 4                                          | V | V |   |   |   | V |   | 3 |
| SLC4A7     | solute carrier family 4, sodium bicarbonate cotransporter, member 7                                           | V | V |   | V |   |   |   | 3 |
| SMC1A      | structural maintenance of chromosomes 1A                                                                      | V | V |   |   |   | V |   | 3 |
| SNHG11     | small nucleolar RNA host gene 11 (non-protein coding)                                                         | V | V |   |   |   | V |   | 3 |
| SPRY3      | sprouty homolog 3 (Drosophila)                                                                                | V | V |   |   |   |   | V | 3 |
| ST6GALNAC3 | ST6 (alpha-N-acetyl-neuraminyl-2,3-beta-galactosyl-1,3)-N-acetylgalactosaminide alpha-2,6-sialyltransferase 3 | V | V |   |   |   | V |   | 3 |
| STAG3L4    | stromal antigen 3-like 4 (pseudogene)                                                                         | V | V |   |   | V |   |   | 3 |
| STIM2      | stromal interaction molecule 2                                                                                | V |   | V | V |   |   |   | 3 |

|          |                                                                   |   |   |   |   |  |   |   |   |
|----------|-------------------------------------------------------------------|---|---|---|---|--|---|---|---|
| STXBP4   | syntaxin binding protein 4                                        | V | V |   |   |  |   | V | 3 |
| SYN2     | synapsin II                                                       | V | V |   |   |  | V |   | 3 |
| TARDBP   | TAR DNA binding protein                                           | V |   |   | V |  |   | V | 3 |
| TBKBP1   | TBK1 binding protein 1                                            | V | V |   |   |  | V |   | 3 |
| THSD7B   | thrombospondin, type I, domain containing 7B                      | V | V |   |   |  | V |   | 3 |
| TINF2    | TERF1 (TRF1)-interacting nuclear factor 2                         | V | V | V |   |  |   |   | 3 |
| TMED7    | transmembrane emp24 protein transport domain containing 7         | V |   |   | V |  |   | V | 3 |
| TMEM86A  | transmembrane protein 86A                                         | V | V |   |   |  |   | V | 3 |
| TMSB4XP8 | Thymosin Beta 4, X-Linked Pseudogene 8                            | V | V |   |   |  |   | V | 3 |
| TNRC6B   | trinucleotide repeat containing 6B                                | V | V |   |   |  |   | V | 3 |
| TRHDE    | thyrotropin-releasing hormone degrading enzyme                    | V | V |   |   |  |   | V | 3 |
| TRPS1    | trichorhinophalangeal syndrome I                                  | V | V |   |   |  |   | V | 3 |
| TSC1     | tuberous sclerosis 1                                              | V |   | V |   |  |   | V | 3 |
| TSPYL4   | TSPY-like 4                                                       | V | V |   |   |  | V |   | 3 |
| TUB      | tubby bipartite transcription factor                              | V |   |   | V |  |   | V | 3 |
| TUFT1    | tuftelin 1                                                        | V | V |   |   |  |   | V | 3 |
| TXNDC5   | thioredoxin domain containing 5 (endoplasmic reticulum)           | V |   |   |   |  |   | V | 3 |
| UBA3     | ubiquitin-like modifier activating enzyme 3                       | V | V |   |   |  | V |   | 3 |
| UBE2V2   | ubiquitin-conjugating enzyme E2 variant 2                         | V | V |   |   |  | V |   | 3 |
| UCHL3    | ubiquitin carboxyl-terminal esterase L3 (ubiquitin thiolesterase) | V |   | V | V |  |   |   | 3 |
| VAMP7    | vesicle-associated membrane protein 7                             | V | V |   |   |  |   | V | 3 |
| WDFY1    | WD repeat and FYVE domain containing 1                            | V | V |   |   |  |   | V | 3 |
| WDR26    | WD repeat domain 26                                               | V |   |   | V |  |   | V | 3 |
| YOD1     | YOD1 deubiquitinase                                               | V |   |   |   |  |   | V | 3 |
| ZDHHC17  | zinc finger, DHHC-type containing 17                              | V | V |   |   |  | V |   | 3 |
| ZDHHC9   | zinc finger, DHHC-type containing 9                               | V | V |   |   |  | V |   | 3 |
| LTN1     | Listerin E3 Ubiquitin Protein Ligase 1                            | V |   |   | V |  |   | V | 3 |
| ZNF81    | zinc finger protein 81                                            | V | V |   | V |  |   |   | 3 |
| ARPP19   | CAMP Regulated Phosphoprotein 19                                  |   | V |   |   |  | V | V | 3 |
| SIK3     | SIK Family Kinase 3                                               |   | V |   |   |  | V | V | 3 |
| OAS3     | 2'-5'-oligoadenylate synthetase 3, 100kDa                         |   | V | V |   |  |   | V | 3 |
| PALM2    | paralemmin 2                                                      |   | V |   |   |  | V | V | 3 |
| CLVS1    | Clavesin 1                                                        |   | V |   |   |  | V | V | 3 |
| GPCPD1   | Glycerophosphocholine Phosphodiesterase 1                         |   | V |   |   |  | V | V | 3 |
| SP1      | Sp1 transcription factor                                          |   | V |   | V |  |   | V | 3 |
| TMEM150A | Transmembrane Protein 150A                                        |   | V |   |   |  | V | V | 3 |
| TPM3     | tropomyosin 3                                                     |   | V |   | V |  | V |   | 3 |
| BTRC     | beta-transducin repeat containing E3 ubiquitin protein ligase     | V |   |   |   |  |   |   | 1 |
| KRTAP3-2 | keratin associated protein 3-2                                    | V |   |   |   |  |   |   | 1 |
