# Supplementary material
Source: publisher figshare collection journal article supplement (https://tandf.figshare.com/articles/dataset/_/7477601)
Supplement: Supplementary file 1 [file 2 › ibmk_a_1508308_sm7118.pdf]

Supplemental Table S2. Mmu-miR-206-3p *in silico* predicted targets.

| TARGET GENE | GENE DESCRIPTION                                                            | VALIDATION | DIANA | MIRANDA | MIRBRIDGE | PICTAR | PITA | RNA22 | TARGETSCAN | TOTAL_HIT |
|-------------|-----------------------------------------------------------------------------|------------|-------|---------|-----------|--------|------|-------|------------|-----------|
| MET         | met proto-oncogene                                                          | V          | V     | V       | V         | V      | V    | V     | V          | 8         |
| GJA1        | gap junction protein, alpha 1, 43kDa                                        | V          | V     | V       | V         | V      | V    |       | V          | 7         |
| TRIM2       | tripartite motif containing 2                                               |            | V     | V       | V         | V      | V    | V     | V          | 7         |
| UBN1        | ubinuclein 1                                                                |            | V     | V       | V         | V      | V    | V     | V          | 7         |
| BCL11A      | B-cell CLL/lymphoma 11A (zinc finger protein)                               |            | V     | V       | V         | V      | V    | V     | V          | 7         |
| ETS1        | v-ets avian erythroblastosis virus E26 oncogene homolog 1                   |            | V     | V       | V         | V      | V    | V     | V          | 7         |
| RASA1       | RAS p21 protein activator (GTPase activating protein) 1                     |            | V     | V       | V         | V      | V    | V     | V          | 7         |
| PTPLAD1     | protein tyrosine phosphatase-like A domain containing 1                     |            | V     | V       | V         | V      | V    | V     | V          | 7         |
| NRP1        | neuropilin 1                                                                |            | V     | V       | V         | V      | V    | V     | V          | 7         |
| ANXA4       | annexin A4                                                                  |            | V     | V       | V         | V      | V    | V     | V          | 7         |
| KLF13       | Kruppel-like factor 13                                                      |            | V     | V       | V         | V      | V    | V     | V          | 7         |
| THBS1       | thrombospondin 1                                                            |            | V     | V       | V         | V      | V    | V     | V          | 7         |
| HNRNPU      | heterogeneous nuclear ribonucleoprotein U (scaffold attachment factor A)    |            | V     | V       | V         | V      | V    | V     | V          | 7         |
| JARID2      | jumonji, AT rich interactive domain 2                                       |            | V     | V       | V         | V      | V    | V     | V          | 7         |
| MMD         | monocyte to macrophage differentiation-associated                           |            | V     | V       | V         | V      | V    | V     | V          | 7         |
| ADAR        | adenosine deaminase, RNA-specific                                           |            | V     | V       | V         | V      | V    |       | V          | 6         |
| HSP90B1     | heat shock protein 90kDa beta (Grp94), member 1                             |            | V     | V       | V         | V      | V    |       | V          | 6         |
| FZD7        | frizzled family receptor 7                                                  |            | V     | V       | V         | V      | V    |       | V          | 6         |
| TBP         | TATA box binding protein                                                    |            | V     | V       | V         | V      | V    |       | V          | 6         |
| PAX3        | paired box 3                                                                |            | V     | V       | V         | V      | V    |       | V          | 6         |
| PAFAH1B1    | platelet-activating factor acetylhydrolase 1b, regulatory subunit 1 (45kDa) |            | V     | V       |           | V      | V    | V     | V          | 6         |
| FUBP1       | far upstream element (FUSE) binding protein 1                               |            | V     | V       | V         | V      | V    |       | V          | 6         |
| IGF1        | insulin-like growth factor 1 (somatomedin C)                                |            | V     | V       | V         |        | V    | V     | V          | 6         |
| FRAS1       | Fraser syndrome 1                                                           |            | V     | V       |           | V      | V    | V     | V          | 6         |
| FOSB        | FBJ murine osteosarcoma viral oncogene homolog B                            |            | V     | V       | V         | V      | V    |       | V          | 6         |
| HOXB4       | homeobox B4                                                                 |            | V     | V       |           | V      | V    | V     | V          | 6         |
| KCNIP3      | Kv channel interacting protein 3, calsenilin                                |            | V     | V       | V         | V      |      | V     | V          | 6         |
| FBXO33      | F-box protein 33                                                            |            | V     | V       |           | V      | V    | V     | V          | 6         |
| KCTD13      | potassium channel tetramerization domain containing 13                      |            | V     | V       |           | V      | V    | V     | V          | 6         |
| KIF2A       | kinesin heavy chain member 2A                                               |            | V     | V       |           | V      | V    | V     | V          | 6         |
| GCLC        | glutamate-cysteine ligase, catalytic subunit                                |            | V     | V       | V         | V      |      | V     | V          | 6         |
| SPRED1      | sprouty-related, EVH1 domain containing 1                                   |            | V     | V       |           | V      | V    | V     | V          | 6         |
| SP2         | Sp2 transcription factor                                                    |            | V     | V       | V         | V      | V    |       | V          | 6         |
| TIMP3       | TIMP metallopeptidase inhibitor 3                                           |            | V     |         | V         | V      | V    | V     | V          | 6         |
| PFN2        | profilin 2                                                                  |            | V     | V       | V         |        | V    | V     | V          | 6         |
| AP3D1       | adaptor-related protein complex 3, delta 1 subunit                          |            | V     | V       | V         | V      | V    |       | V          | 6         |
| ZNF236      | zinc finger protein 236                                                     |            | V     | V       |           | V      | V    | V     | V          | 6         |

|           |                                                                                          |   |   |   |   |   |   |   |   |
|-----------|------------------------------------------------------------------------------------------|---|---|---|---|---|---|---|---|
| ARCN1     | archain 1                                                                                | V | V | V | V | V | V | V | 6 |
| RARB      | retinoic acid receptor, beta                                                             |   | V | V |   | V | V | V | 6 |
| NR4A2     | nuclear receptor subfamily 4, group A, member 2                                          |   | V | V | V | V | V | V | 6 |
| SOX9      | SRY (sex determining region Y)-box 9                                                     |   | V | V | V |   | V | V | 6 |
| UTRN      | utrophin                                                                                 |   | V | V | V |   | V | V | 6 |
| LIN7C     | lin-7 homolog C (C. elegans)                                                             |   | V | V |   | V | V | V | 6 |
| NOTCH3    | notch 3                                                                                  |   | V | V | V | V |   | V | 6 |
| SRSF9     | Serine And Arginine Rich Splicing Factor 9                                               |   | V | V | V | V | V | V | 6 |
| SRSF3     | Serine And Arginine Rich Splicing Factor 3                                               |   | V | V | V | V | V | V | 6 |
| TRA2B     | Transformer 2 Beta Homolog                                                               |   | V | V | V | V | V | V | 6 |
| PSIP1     | PC4 And SFRS1 Interacting Protein 1                                                      |   | V | V | V | V | V | V | 6 |
| EIF4E     | eukaryotic translation initiation factor 4E                                              |   | V | V | V | V | V | V | 6 |
| SFRP1     | secreted frizzled-related protein 1                                                      |   | V | V | V | V | V | V | 6 |
| YWHAZ     | tyrosine 3-monooxygenase/tryptophan 5-monooxygenase activation protein, zeta polypeptide |   | V | V | V | V | V | V | 6 |
| EFNB2     | ephrin-B2                                                                                |   | V | V | V | V | V | V | 6 |
| EDN1      | endothelin 1                                                                             |   | V | V | V | V | V | V | 6 |
| BACH2     | BTB and CNC homology 1, basic leucine zipper transcription factor 2                      |   | V | V |   | V | V | V | 6 |
| BAG4      | BCL2-associated athanogene 4                                                             |   | V | V | V | V | V | V | 6 |
| HDAC4     | histone deacetylase 4                                                                    |   | V | V | V | V | V | V | 6 |
| NFAT5     | nuclear factor of activated T-cells 5, tonicity-responsive                               |   | V | V | V | V |   | V | 6 |
| MAP1A     | microtubule-associated protein 1A                                                        |   | V | V | V | V | V | V | 6 |
| DMPK      | dystrophia myotonica-protein kinase                                                      |   | V | V | V | V | V | V | 6 |
| MAP4K3    | mitogen-activated protein kinase kinase kinase 3                                         |   | V | V | V | V | V | V | 6 |
| BDNF      | brain-derived neurotrophic factor                                                        |   | V | V | V | V | V | V | 6 |
| NDRG3     | NDRG family member 3                                                                     |   | V | V |   | V | V | V | 6 |
| DHX15     | DEAH (Asp-Glu-Ala-His) box helicase 15                                                   |   | V | V | V | V | V | V | 6 |
| MATR3     | matrin 3                                                                                 |   | V | V | V | V | V | V | 6 |
| TNKS2     | tankyrase, TRF1-interacting ankyrin-related ADP-ribose polymerase 2                      |   | V | V | V | V | V | V | 6 |
| RIT2      | Ras-like without CAAX 2                                                                  |   | V | V | V | V | V | V | 6 |
| DDX5      | DEAD (Asp-Glu-Ala-Asp) box helicase 5                                                    |   | V | V | V | V | V | V | 6 |
| MED1      | mediator complex subunit 1                                                               |   | V | V | V | V | V | V | 6 |
| BSN       | bassoon presynaptic cytomatrix protein                                                   |   | V |   | V | V | V | V | 6 |
| NCL       | nucleolin                                                                                |   | V | V | V |   | V | V | 6 |
| WDR1      | WD repeat domain 1                                                                       |   | V | V | V | V | V | V | 6 |
| CTTNBP2NL | CTTNBP2 N-terminal like                                                                  |   | V |   | V | V | V | V | 6 |
| SNX2      | sorting nexin 2                                                                          |   | V | V | V | V | V | V | 6 |
| RYBP      | RING1 and YY1 binding protein                                                            |   | V | V | V |   | V | V | 6 |
| TSPYL4    | TSPY-like 4                                                                              |   | V | V | V | V | V | V | 6 |
| MSANTD2   | Myb/SANT DNA Binding Domain Containing 2                                                 |   | V | V |   | V | V | V | 6 |
| VGLL4     | vestigial like 4 (Drosophila)                                                            |   | V | V | V | V | V | V | 6 |

|          |                                                                                   |   |   |   |   |   |   |   |   |
|----------|-----------------------------------------------------------------------------------|---|---|---|---|---|---|---|---|
| RNF138   | ring finger protein 138, E3 ubiquitin protein ligase                              | V | V |   | V | V | V | V | 6 |
| MYLK     | myosin light chain kinase                                                         | V | V | V | V | V |   | V | 6 |
| HS3ST3B1 | heparan sulfate (glucosamine) 3-O-sulfotransferase 3B1                            | V | V |   | V | V | V | V | 6 |
| VEGFA    | vascular endothelial growth factor A                                              | V | V | V |   | V | V | V | 6 |
| MNT      | MNT, MAX dimerization protein                                                     | V | V | V | V | V |   | V | 6 |
| RNF38    | ring finger protein 38                                                            | V | V |   | V | V | V | V | 6 |
| CREM     | cAMP responsive element modulator                                                 | V | V | V | V | V |   | V | 6 |
| TMEM243  | Transmembrane Protein 243                                                         | V | V |   | V | V | V | V | 6 |
| MPP5     | membrane protein, palmitoylated 5 (MAGUK p55 subfamily member 5)                  | V |   | V | V | V | V | V | 6 |
| VAMP4    | vesicle-associated membrane protein 4                                             | V | V | V | V | V |   | V | 6 |
| CORO1C   | coronin, actin binding protein, 1C                                                | V |   | V | V | V | V | V | 6 |
| VAMP2    | vesicle-associated membrane protein 2 (synaptobrevin 2)                           | V | V | V | V | V |   | V | 6 |
| UST      | uronyl-2-sulfotransferase                                                         | V | V | V | V | V |   | V | 6 |
| RRBP1    | ribosome binding protein 1                                                        | V | V | V | V | V |   | V | 6 |
| SNAP25   | synaptosomal-associated protein, 25kDa                                            | V | V | V | V | V |   | V | 6 |
| CNN3     | calponin 3, acidic                                                                | V | V | V | V | V |   | V | 6 |
| CLTC     | clathrin, heavy chain (Hc)                                                        | V | V | V | V | V |   | V | 6 |
| CLCN3    | chloride channel, voltage-sensitive 3                                             | V | V |   | V | V | V | V | 6 |
| RSBN1    | round spermatid basic protein 1                                                   | V | V | V | V | V |   | V | 6 |
| UBE4A    | ubiquitination factor E4A                                                         | V | V | V | V | V |   | V | 6 |
| SULF1    | sulfatase 1                                                                       | V | V | V |   | V | V | V | 6 |
| CCND2    | cyclin D2                                                                         | V | V | V | V | V |   | V | 6 |
| CD164    | CD164 molecule, sialomucin                                                        | V | V | V |   | V | V | V | 6 |
| CDK6     | cyclin-dependent kinase 6                                                         | V | V |   | V | V | V | V | 6 |
| CD2AP    | CD2-associated protein                                                            | V | V | V |   | V |   | V | 5 |
| CDC42    | cell division cycle 42                                                            | V | V | V | V |   |   | V | 5 |
| MPZ      | myelin protein zero                                                               | V | V | V | V |   |   | V | 5 |
| CDK9     | cyclin-dependent kinase 9                                                         | V | V | V | V |   |   | V | 5 |
| CCND1    | cyclin D1                                                                         | V |   | V | V |   | V | V | 5 |
| CEBPZ    | CCAAT/enhancer binding protein (C/EBP), zeta                                      | V | V | V |   | V | V |   | 5 |
| RSBN1L   | round spermatid basic protein 1-like                                              | V | V |   | V | V |   | V | 5 |
| CHSY1    | chondroitin sulfate synthase 1                                                    | V | V | V |   | V | V |   | 5 |
| CITED2   | Cbp/p300-interacting transactivator, with Glu/Asp-rich carboxy-terminal domain, 2 | V | V | V |   | V |   | V | 5 |
| CBL      | Cbl proto-oncogene, E3 ubiquitin protein ligase                                   | V | V | V |   | V |   | V | 5 |
| UBE2H    | ubiquitin-conjugating enzyme E2H                                                  | V | V |   | V | V |   | V | 5 |
| UBR5     | ubiquitin protein ligase E3 component n-recognin 5                                | V | V |   | V | V |   | V | 5 |
| USP33    | ubiquitin specific peptidase 33                                                   | V |   | V | V | V |   | V | 5 |
| COL4A3   | collagen, type IV, alpha 3 (Goodpasture antigen)                                  | V | V | V | V |   |   | V | 5 |
| CAPRIN1  | cell cycle associated protein 1                                                   | V | V | V |   | V |   | V | 5 |
| CAAP1    | Caspase Activity And Apoptosis Inhibitor 1                                        | V | V |   | V | V |   | V | 5 |

|         |                                                                                 |   |   |   |   |   |   |   |   |
|---------|---------------------------------------------------------------------------------|---|---|---|---|---|---|---|---|
| RNGTT   | RNA guanylyltransferase and 5'-phosphatase                                      | V | V |   | V | V |   | V | 5 |
| CPEB1   | cytoplasmic polyadenylation element binding protein 1                           | V | V |   | V | V |   | V | 5 |
| RSPO3   | R-spondin 3                                                                     | V | V |   | V | V |   | V | 5 |
| TWF1    | twinfilin actin-binding protein 1                                               | V | V | V |   | V |   | V | 5 |
| CREB5   | cAMP responsive element binding protein 5                                       | V | V | V |   | V |   | V | 5 |
| CREBL2  | cAMP responsive element binding protein-like 2                                  | V | V |   | V | V |   | V | 5 |
| VASP    | vasodilator-stimulated phosphoprotein                                           | V | V | V |   | V |   | V | 5 |
| MXD1    | MAX dimerization protein 1                                                      | V | V | V |   | V |   | V | 5 |
| MXD4    | MAX dimerization protein 4                                                      | V |   | V | V |   | V | V | 5 |
| KMT2E   | Lysine Methyltransferase 2E                                                     | V | V |   | V | V |   | V | 5 |
| NAB1    | NGFI-A binding protein 1 (EGR1 binding protein 1)                               | V | V | V |   | V |   | V | 5 |
| NAMPT   | nicotinamide phosphoribosyltransferase                                          | V | V | V |   | V |   | V | 5 |
| NBEA    | neurobeachin                                                                    | V | V |   |   | V | V | V | 5 |
| MIPOL1  | mirror-image polydactyly 1                                                      | V | V |   | V | V |   | V | 5 |
| NCK2    | NCK adaptor protein 2                                                           | V | V | V |   | V |   | V | 5 |
| SEC62   | SEC62 homolog (S. cerevisiae)                                                   | V | V |   | V | V |   | V | 5 |
| CYB5B   | cytochrome b5 type B (outer mitochondrial membrane)                             | V | V | V |   | V |   | V | 5 |
| TRAPPC3 | trafficking protein particle complex 3                                          | V | V |   | V | V |   | V | 5 |
| SEC63   | SEC63 homolog (S. cerevisiae)                                                   | V | V |   | V | V |   | V | 5 |
| DAAM1   | dishevelled associated activator of morphogenesis 1                             | V | V |   | V | V |   | V | 5 |
| TNPO2   | transportin 2                                                                   | V |   | V | V | V |   | V | 5 |
| MEX3C   | mex-3 RNA binding family member C                                               | V | V |   | V | V |   | V | 5 |
| DDX17   | DEAD (Asp-Glu-Ala-Asp) box helicase 17                                          | V | V | V |   | V |   | V | 5 |
| MEIS1   | Meis homeobox 1                                                                 | V | V |   | V | V |   | V | 5 |
| BSCL2   | Berardinelli-Seip congenital lipodystrophy 2 (seipin)                           | V | V |   | V |   | V | V | 5 |
| WDR48   | WD repeat domain 48                                                             | V | V |   | V | V |   | V | 5 |
| SEMA6D  | sema domain, transmembrane domain (TM), and cytoplasmic domain, (semaphorin) 6D | V |   | V | V | V |   | V | 5 |
| NCOA3   | nuclear receptor coactivator 3                                                  | V | V | V | V | V |   |   | 5 |
| BLCAP   | bladder cancer associated protein                                               | V | V |   | V | V |   | V | 5 |
| WNK3    | WNK lysine deficient protein kinase 3                                           | V | V |   | V | V |   | V | 5 |
| MAPKBP1 | mitogen-activated protein kinase binding protein 1                              | V | V |   |   | V | V | V | 5 |
| TMEM55B | transmembrane protein 55B                                                       | V | V |   | V | V |   | V | 5 |
| RGS7    | regulator of G-protein signaling 7                                              | V | V | V |   | V | V |   | 5 |
| DLG4    | discs, large homolog 4 (Drosophila)                                             | V | V |   | V | V |   | V | 5 |
| BCL7A   | B-cell CLL/lymphoma 7A                                                          | V | V |   | V | V |   | V | 5 |
| SETBP1  | SET binding protein 1                                                           | V |   | V | V | V |   | V | 5 |
| NEUROD1 | neuronal differentiation 1                                                      | V | V | V |   | V | V |   | 5 |
| MAL2    | mal, T-cell differentiation protein 2 (gene/pseudogene)                         | V | V |   | V |   | V | V | 5 |
| MAGI2   | membrane associated guanylate kinase, WW and PDZ domain containing 2            | V | V | V | V |   |   | V | 5 |
| TMCC1   | transmembrane and coiled-coil domain family 1                                   | V | V |   | V | V |   | V | 5 |

|          |                                                                                           |   |   |   |   |   |   |   |   |
|----------|-------------------------------------------------------------------------------------------|---|---|---|---|---|---|---|---|
| E2F5     | E2F transcription factor 5, p130-binding                                                  | V | V |   | V | V |   | V | 5 |
| MAB21L1  | mab-21-like 1 (C. elegans)                                                                | V | V |   | V | V |   | V | 5 |
| YWHAQ    | tyrosine 3-monooxygenase/tryptophan 5-monooxygenase activation protein, theta polypeptide | V | V | V | V | V |   |   | 5 |
| AZIN1    | antizyme inhibitor 1                                                                      | V | V |   | V | V |   | V | 5 |
| NGFR     | nerve growth factor receptor                                                              | V | V | V | V |   |   | V | 5 |
| AGO1     | Argonaute 1, RISC Catalytic Component                                                     | V | V |   | V | V |   | V | 5 |
| ZBTB4    | zinc finger and BTB domain containing 4                                                   | V | V |   | V | V |   | V | 5 |
| ZIC4     | Zic family member 4                                                                       | V | V |   | V | V |   | V | 5 |
| ASH2L    | ash2 (absent, small, or homeotic)-like (Drosophila)                                       | V | V | V | V |   |   | V | 5 |
| ZMAT3    | zinc finger, matrin-type 3                                                                | V | V |   | V | V |   | V | 5 |
| ARRDC3   | arrestin domain containing 3                                                              | V | V |   | V | V | V |   | 5 |
| ARID2    | AT rich interactive domain 2 (ARID, RFX-like)                                             | V | V | V |   | V |   | V | 5 |
| EPB41L1  | erythrocyte membrane protein band 4.1-like 1                                              | V | V |   |   | V | V | V | 5 |
| KTN1     | kinectin 1 (kinesin receptor)                                                             | V | V |   | V | V |   | V | 5 |
| RCAN2    | regulator of calcineurin 2                                                                | V | V |   | V | V |   | V | 5 |
| EYA4     | eyes absent homolog 4 (Drosophila)                                                        | V | V |   | V | V |   | V | 5 |
| AP1G1    | adaptor-related protein complex 1, gamma 1 subunit                                        | V | V | V | V | V |   |   | 5 |
| RAB5A    | RAB5A, member RAS oncogene family                                                         | V | V | V |   | V |   | V | 5 |
| THRB     | thyroid hormone receptor, beta                                                            | V |   | V | V |   | V | V | 5 |
| ANP32B   | acidic (leucine-rich) nuclear phosphoprotein 32 family, member B                          | V | V |   | V | V |   | V | 5 |
| QKI      | QKI, KH domain containing, RNA binding                                                    | V | V |   | V | V |   | V | 5 |
| CEP44    | Centrosomal Protein 44                                                                    | V | V |   |   | V | V | V | 5 |
| SLC25A25 | solute carrier family 25 (mitochondrial carrier; phosphate carrier), member 25            | V | V |   | V | V |   | V | 5 |
| KHSRP    | KH-type splicing regulatory protein                                                       | V | V |   | V | V |   | V | 5 |
| ANXA2    | annexin A2                                                                                |   | V | V | V | V |   | V | 5 |
| SLC35F1  | solute carrier family 35, member F1                                                       | V | V |   |   | V | V | V | 5 |
| API5     | apoptosis inhibitor 5                                                                     |   | V | V | V | V |   | V | 5 |
| FBXW7    | F-box and WD repeat domain containing 7, E3 ubiquitin protein ligase                      | V | V | V |   | V |   | V | 5 |
| TGFBR3   | transforming growth factor, beta receptor III                                             | V |   | V | V | V |   | V | 5 |
| FGF14    | fibroblast growth factor 14                                                               | V | V | V | V | V |   |   | 5 |
| OTUB2    | OTU domain, ubiquitin aldehyde binding 2                                                  | V | V | V |   | V | V |   | 5 |
| SLC39A10 | solute carrier family 39 (zinc transporter), member 10                                    | V | V |   |   | V | V | V | 5 |
| JOSD1    | Josephin domain containing 1                                                              | V | V |   | V | V |   | V | 5 |
| FN1      | fibronectin 1                                                                             | V | V | V | V | V |   |   | 5 |
| AMOT     | angiomotin                                                                                | V | V | V |   | V |   | V | 5 |
| FNDC3A   | fibronectin type III domain containing 3A                                                 | V | V |   | V | V |   | V | 5 |
| FNDC3B   | fibronectin type III domain containing 3B                                                 | V | V |   | V | V |   | V | 5 |
| OTUD5    | OTU domain containing 5                                                                   | V | V |   | V |   | V | V | 5 |
| FOXP1    | forkhead box P1                                                                           | V | V |   | V | V |   | V | 5 |
| AKAP11   | A kinase (PRKA) anchor protein 11                                                         | V | V |   | V | V |   | V | 5 |

|         |                                                                                                            |   |   |   |   |   |   |   |   |
|---------|------------------------------------------------------------------------------------------------------------|---|---|---|---|---|---|---|---|
| SLC44A1 | solute carrier family 44 (choline transporter), member 1                                                   | V | V |   | V | V |   | V | 5 |
| AIF1L   | allograft inflammatory factor 1-like                                                                       | V | V |   |   | V | V | V | 5 |
| OTX2    | orthodenticle homeobox 2                                                                                   | V | V |   | V | V |   | V | 5 |
| SMARCC1 | SWI/SNF related, matrix associated, actin dependent regulator of chromatin, subfamily c, member 1          | V | V | V |   | V |   | V | 5 |
| HNRNPK  | heterogeneous nuclear ribonucleoprotein K                                                                  |   | V | V | V | V |   | V | 5 |
| TBC1D15 | TBC1 domain family, member 15                                                                              | V | V |   | V | V |   | V | 5 |
| ADPGK   | ADP-dependent glucokinase                                                                                  | V | V |   | V | V |   | V | 5 |
| HSPE1   | heat shock 10kDa protein 1                                                                                 | V |   | V | V |   | V | V | 5 |
| HSPD1   | heat shock 60kDa protein 1 (chaperonin)                                                                    |   | V | V | V | V |   | V | 5 |
| JUND    | jun D proto-oncogene                                                                                       |   | V | V | V | V |   | V | 5 |
| SYT1    | synaptotagmin I                                                                                            | V | V | V | V |   |   | V | 5 |
| KCNA5   | potassium voltage-gated channel, shaker-related subfamily, member 5                                        |   | V | V | V | V |   | V | 5 |
| ZFP36L1 | ZFP36 ring finger protein-like 1                                                                           |   | V | V | V | V |   | V | 5 |
| PDCD10  | programmed cell death 10                                                                                   | V | V |   | V | V |   | V | 5 |
| PDGFA   | platelet-derived growth factor alpha polypeptide                                                           | V | V | V |   | V |   | V | 5 |
| GDAP1L1 | ganglioside induced differentiation associated protein 1-like 1                                            | V | V |   | V | V |   | V | 5 |
| GDF6    | growth differentiation factor 6                                                                            | V | V |   | V | V |   | V | 5 |
| STC2    | stanniocalcin 2                                                                                            | V | V | V |   | V |   | V | 5 |
| HMGN1   | high mobility group nucleosome binding domain 1                                                            | V |   | V | V | V |   | V | 5 |
| GIT1    | G protein-coupled receptor kinase interacting ArfGAP 1                                                     | V | V |   | V | V |   | V | 5 |
| HIVP2   | human immunodeficiency virus type I enhancer binding protein 2                                             | V | V |   | V | V |   | V | 5 |
| GLCCI1  | glucocorticoid induced transcript 1                                                                        | V | V |   |   | V | V | V | 5 |
| SMG7    | SMG7 nonsense mediated mRNA decay factor                                                                   | V | V |   |   | V | V | V | 5 |
| PDIK1L  | PDLIM1 interacting kinase 1 like                                                                           | V | V |   | V | V |   | V | 5 |
| GMFB    | glia maturation factor, beta                                                                               | V | V | V |   |   | V | V | 5 |
| PTPRG   | protein tyrosine phosphatase, receptor type, G                                                             | V | V |   | V | V |   | V | 5 |
| HIC2    | hypermethylated in cancer 2                                                                                | V | V |   | V | V |   | V | 5 |
| HIAT1   | hippocampus abundant transcript 1                                                                          | V | V |   | V | V |   | V | 5 |
| PHAX    | phosphorylated adaptor for RNA export                                                                      | V |   | V | V | V |   | V | 5 |
| PTBP1   | polypyrimidine tract binding protein 1                                                                     | V |   | V | V |   | V | V | 5 |
| HACE1   | HECT domain and ankyrin repeat containing E3 ubiquitin protein ligase 1                                    | V | V |   | V | V |   | V | 5 |
| SNAI2   | snail family zinc finger 2                                                                                 | V | V |   | V | V |   | V | 5 |
| PRKRIR  | protein-kinase, interferon-inducible double stranded RNA dependent inhibitor, repressor of (P58 repressor) | V | V | V |   | V |   | V | 5 |
| MPP7    | membrane protein, palmitoylated 7 (MAGUK p55 subfamily member 7)                                           | V | V | V |   | V |   | V | 5 |
| PICALM  | phosphatidylinositol binding clathrin assembly protein                                                     | V | V | V |   | V |   | V | 5 |
| GPR85   | G protein-coupled receptor 85                                                                              | V | V |   | V |   |   | V | 4 |
| GRK6    | G protein-coupled receptor kinase 6                                                                        | V |   | V | V |   |   | V | 4 |
| GPR137C | G protein-coupled receptor 137C                                                                            | V | V |   |   | V |   | V | 4 |
| GTF2B   | general transcription factor IIB                                                                           | V |   | V | V |   |   | V | 4 |
| GPD2    | glycerol-3-phosphate dehydrogenase 2 (mitochondrial)                                                       | V |   |   | V | V |   | V | 4 |

|         |                                                                                                   |   |   |   |   |   |   |   |
|---------|---------------------------------------------------------------------------------------------------|---|---|---|---|---|---|---|
| SOX6    | SRY (sex determining region Y)-box 6                                                              | V | V |   | V |   | V | 4 |
| HAND2   | heart and neural crest derivatives expressed 2                                                    | V |   | V | V |   | V | 4 |
| HCN1    | hyperpolarization activated cyclic nucleotide-gated potassium channel 1                           | V | V |   |   | V | V | 4 |
| GNPTAB  | N-acetylglucosamine-1-phosphate transferase, alpha and beta subunits                              | V |   |   | V |   | V | 4 |
| SMYD4   | SET and MYND domain containing 4                                                                  | V | V |   | V |   | V | 4 |
| GNPDA2  | glucosamine-6-phosphate deaminase 2                                                               | V |   |   | V | V | V | 4 |
| SP1     | Sp1 transcription factor                                                                          | V | V |   |   | V | V | 4 |
| SPTLC3  | serine palmitoyltransferase, long chain base subunit 3                                            | V | V |   |   | V | V | 4 |
| SRI     | sorcin                                                                                            | V | V | V |   |   | V | 4 |
| SMEK2   | SMEK homolog 2, suppressor of mek1 (Dictyostelium)                                                | V | V |   |   | V | V | 4 |
| HMGCR   | 3-hydroxy-3-methylglutaryl-CoA reductase                                                          | V | V |   | V |   | V | 4 |
| SS18    | synovial sarcoma translocation, chromosome 18                                                     | V | V |   | V |   | V | 4 |
| HNRNPA3 | heterogeneous nuclear ribonucleoprotein A3                                                        | V | V |   |   | V | V | 4 |
| STK39   | serine threonine kinase 39                                                                        | V |   | V | V |   | V | 4 |
| GAN     | gigaxonin                                                                                         | V | V |   |   | V | V | 4 |
| TAGLN2  | transgelin 2                                                                                      | V | V |   |   | V | V | 4 |
| TAL1    | T-cell acute lymphocytic leukemia 1                                                               | V |   | V |   | V | V | 4 |
| TAOK3   | TAO kinase 3                                                                                      | V | V |   |   | V | V | 4 |
| FUBP3   | far upstream element (FUSE) binding protein 3                                                     | V | V |   |   | V | V | 4 |
| FRS2    | fibroblast growth factor receptor substrate 2                                                     | V | V |   |   | V | V | 4 |
| IGFBP5  | insulin-like growth factor binding protein 5                                                      | V | V |   | V |   | V | 4 |
| SMARCB1 | SWI/SNF related, matrix associated, actin dependent regulator of chromatin, subfamily b, member 1 | V |   | V | V |   | V | 4 |
| SMAP1   | small ArfGAP 1                                                                                    | V |   |   | V | V | V | 4 |
| INSM1   | insulinoma-associated 1                                                                           | V | V | V |   | V |   | 4 |
| SLC8A1  | solute carrier family 8 (sodium/calcium exchanger), member 1                                      | V | V | V |   |   | V | 4 |
| INTS6   | integrator complex subunit 6                                                                      | V | V | V |   |   | V | 4 |
| SLC7A6  | solute carrier family 7 (amino acid transporter light chain, y+L system), member 6                | V | V | V |   |   | V | 4 |
| SLC5A3  | solute carrier family 5 (sodium/myo-inositol cotransporter), member 3                             | V | V |   |   | V | V | 4 |
| TBX3    | T-box 3                                                                                           | V |   | V | V |   | V | 4 |
| FNBP1L  | formin binding protein 1-like                                                                     | V | V |   |   | V | V | 4 |
| TEF     | thyrotrophic embryonic factor                                                                     | V |   | V | V |   | V | 4 |
| KANK4   | KN motif and ankyrin repeat domains 4                                                             | V | V |   |   | V | V | 4 |
| TFE3    | transcription factor binding to IGHM enhancer 3                                                   | V |   |   | V |   | V | 4 |
| TFEC    | transcription factor EC                                                                           | V | V | V |   | V |   | 4 |
| SLC38A3 | solute carrier family 38, member 3                                                                | V |   | V | V |   | V | 4 |
| KDM2B   | Lysine Demethylase 2B                                                                             | V | V | V | V |   |   | 4 |
| SLC31A1 | solute carrier family 31 (copper transporter), member 1                                           | V | V |   | V |   | V | 4 |
| FAM91A1 | family with sequence similarity 91, member A1                                                     | V | V |   |   | V | V | 4 |
| KDELR2  | KDEL (Lys-Asp-Glu-Leu) endoplasmic reticulum protein retention receptor 2                         | V | V | V |   |   | V | 4 |
| FAM63B  | family with sequence similarity 63, member B                                                      | V | V |   |   | V | V | 4 |

|          |                                                                                   |   |   |  |   |   |   |   |   |
|----------|-----------------------------------------------------------------------------------|---|---|--|---|---|---|---|---|
| C2CD5    | C2 Calcium Dependent Domain Containing 5                                          | V | V |  |   | V |   | V | 4 |
| ULK2     | Unc-51 Like Autophagy Activating Kinase 2                                         | V | V |  |   | V |   | V | 4 |
| SLC2A13  | solute carrier family 2 (facilitated glucose transporter), member 13              | V | V |  |   |   | V | V | 4 |
| FAM46C   | family with sequence similarity 46, member C                                      | V | V |  |   |   | V | V | 4 |
| ZC2HC1C  | Zinc Finger C2HC-Type Containing 1C                                               | V | V |  |   |   | V | V | 4 |
| NEXMIF   | Neurite Extension And Migration Factor                                            | V | V |  |   |   | V | V | 4 |
| TGIF2    | TGFB-induced factor homeobox 2                                                    | V | V |  |   | V |   | V | 4 |
| SLC25A22 | solute carrier family 25 (mitochondrial carrier: glutamate), member 22            | V |   |  |   | V |   | V | 4 |
| TIGD6    | tigger transposable element derived 6                                             | V | V |  |   |   | V | V | 4 |
| KLF4     | Kruppel-like factor 4 (gut)                                                       | V |   |  | V | V |   | V | 4 |
| SLC23A2  | solute carrier family 23 (ascorbic acid transporter), member 2                    | V | V |  |   |   |   | V | 4 |
| EPHB1    | EPH receptor B1                                                                   | V | V |  | V |   | V |   | 4 |
| SLC16A3  | solute carrier family 16 (monocarboxylate transporter), member 3                  | V |   |  | V |   |   | V | 4 |
| LARP4    | La ribonucleoprotein domain family, member 4                                      | V | V |  |   |   | V | V | 4 |
| LASP1    | LIM and SH3 protein 1                                                             | V |   |  |   | V |   | V | 4 |
| CERS2    | Ceramide Synthase 2                                                               | V | V |  |   |   | V | V | 4 |
| SLC16A2  | solute carrier family 16, member 2 (thyroid hormone transporter)                  | V | V |  |   |   | V | V | 4 |
| SH3TC2   | SH3 domain and tetratricopeptide repeats 2                                        | V | V |  |   |   | V |   | 4 |
| EMP1     | epithelial membrane protein 1                                                     | V | V |  | V |   |   | V | 4 |
| SH3PXD2B | SH3 and PX domains 2B                                                             | V | V |  |   |   |   | V | 4 |
| SH3BGR13 | SH3 domain binding glutamic acid-rich protein like 3                              | V |   |  |   | V | V |   | 4 |
| EML4     | echinoderm microtubule associated protein like 4                                  | V | V |  |   | V |   | V | 4 |
| ELOF1    | elongation factor 1 homolog (S. cerevisiae)                                       | V |   |  |   | V | V |   | 4 |
| LPPR4    | lipid phosphate phosphatase-related protein type 4                                | V | V |  |   |   | V |   | 4 |
| LRAT     | lecithin retinol acyltransferase (phosphatidylcholine--retinol O-acyltransferase) | V | V |  |   |   |   | V | 4 |
| ELMO1    | engulfment and cell motility 1                                                    | V | V |  | V |   | V |   | 4 |
| EIF4E3   | eukaryotic translation initiation factor 4E family member 3                       | V | V |  |   |   | V |   | 4 |
| LRRC8A   | leucine rich repeat containing 8 family, member A                                 | V |   |  |   | V | V |   | 4 |
| EIF1AD   | eukaryotic translation initiation factor 1A domain containing                     | V | V |  |   |   | V |   | 4 |
| TM4SF1   | transmembrane 4 L six family member 1                                             | V | V |  | V |   |   | V | 4 |
| TMEM135  | transmembrane protein 135                                                         | V | V |  |   | V |   |   | 4 |
| DNAJC5   | DnaJ (Hsp40) homolog, subfamily C, member 5                                       | V | V |  |   | V |   |   | 4 |
| MAN1C1   | mannosidase, alpha, class 1C, member 1                                            | V | V |  |   |   | V |   | 4 |
| DNAJC13  | DnaJ (Hsp40) homolog, subfamily C, member 13                                      | V | V |  |   | V | V |   | 4 |
| TMEM178A | Transmembrane Protein 178A                                                        | V | V |  |   |   | V |   | 4 |
| MAP3K1   | mitogen-activated protein kinase kinase kinase 1, E3 ubiquitin protein ligase     | V | V |  |   |   | V |   | 4 |
| MAP4K2   | mitogen-activated protein kinase kinase kinase kinase 2                           | V |   |  | V | V |   | V | 4 |
| TMEM47   | transmembrane protein 47                                                          | V | V |  | V |   |   | V | 4 |
| MAPK1    | mitogen-activated protein kinase 1                                                | V |   |  | V |   | V |   | 4 |
| DICER1   | dicer 1, ribonuclease type III                                                    | V |   |  |   |   | V | V | 4 |

|           |                                                                |   |   |   |   |   |   |   |   |
|-----------|----------------------------------------------------------------|---|---|---|---|---|---|---|---|
| TMOD2     | tropomodulin 2 (neuronal)                                      | V | V |   | V | V |   |   | 4 |
| MBTD1     | mbt domain containing 1                                        | V | V |   |   | V | V |   | 4 |
| SERP1     | stress-associated endoplasmic reticulum protein 1              | V |   | V |   |   | V | V | 4 |
| DGKG      | diacylglycerol kinase, gamma 90kDa                             | V | V |   | V |   |   | V | 4 |
| TNPO1     | transportin 1                                                  | V |   | V |   | V |   | V | 4 |
| MED14     | mediator complex subunit 14                                    | V | V | V |   |   | V |   | 4 |
| DDX3X     | DEAD (Asp-Glu-Ala-Asp) box helicase 3, X-linked                | V | V | V |   |   |   | V | 4 |
| MEOX2     | mesenchyme homeobox 2                                          | V | V |   | V |   |   | V | 4 |
| DCP2      | decapping mRNA 2                                               | V |   | V | V |   |   | V | 4 |
| TPM3      | tropomyosin 3                                                  | V | V |   | V | V |   |   | 4 |
| MIER1     | mesoderm induction early response 1, transcriptional regulator | V | V |   |   | V |   | V | 4 |
| CXORF23   | chromosome X open reading frame 23                             | V | V |   | V |   | V |   | 4 |
| TRHDE     | thyrotropin-releasing hormone degrading enzyme                 | V | V | V |   | V |   |   | 4 |
| TRPS1     | trichorhinophalangeal syndrome I                               | V |   | V | V |   |   | V | 4 |
| RUNX1     | runt-related transcription factor 1                            | V | V |   |   | V | V |   | 4 |
| TTC7B     | tetratricopeptide repeat domain 7B                             | V | V |   |   | V |   | V | 4 |
| CRK       | v-crk avian sarcoma virus CT10 oncogene homolog                | V | V | V | V |   |   |   | 4 |
| MMD2      | monocyte to macrophage differentiation-associated 2            | V | V |   |   |   | V | V | 4 |
| CRIM1     | cysteine rich transmembrane BMP regulator 1 (chordin-like)     | V |   | V | V |   |   | V | 4 |
| CPLX2     | complexin 2                                                    | V | V |   |   | V |   | V | 4 |
| MON2      | MON2 homolog (S. cerevisiae)                                   | V | V |   |   | V |   | V | 4 |
| UBE2D2    | ubiquitin-conjugating enzyme E2D 2                             | V | V |   |   | V | V |   | 4 |
| COL6A3    | collagen, type VI, alpha 3                                     | V | V | V |   |   | V |   | 4 |
| UBQLN1    | ubiquilin 1                                                    | V | V |   | V | V |   |   | 4 |
| CCDC141   | coiled-coil domain containing 141                              | V |   |   |   | V | V | V | 4 |
| CCBL2     | cysteine conjugate-beta lyase 2                                | V | V |   | V |   | V |   | 4 |
| CAP1      | CAP, adenylate cyclase-associated protein 1 (yeast)            | V |   | V | V |   |   | V | 4 |
| CPED1     | Cadherin Like And PC-Esterase Domain Containing 1              | V | V |   |   | V |   | V | 4 |
| TMSB4X    | thymosin beta 4, X-linked                                      |   | V |   | V | V |   | V | 4 |
| RNF40     | ring finger protein 40, E3 ubiquitin protein ligase            | V |   |   | V |   | V | V | 4 |
| MT1H      | metallothionein 1H                                             | V | V | V |   |   | V |   | 4 |
| SMIM14    | Small Integral Membrane Protein 14                             | V | V |   | V |   |   | V | 4 |
| RNF19A    | ring finger protein 19A, RBR E3 ubiquitin protein ligase       | V | V | V | V |   |   |   | 4 |
| MTSS1     | metastasis suppressor 1                                        | V |   | V | V |   |   | V | 4 |
| MTX1      | metaxin 1                                                      | V | V |   | V |   |   | V | 4 |
| MUM1L1    | melanoma associated antigen (mutated) 1-like 1                 | V | V |   | V |   |   | V | 4 |
| C2ORF69   | chromosome 2 open reading frame 69                             | V | V |   |   | V |   | V | 4 |
| C20ORF112 | chromosome 20 open reading frame 112                           | V |   |   | V | V |   | V | 4 |
| VEZF1     | vascular endothelial zinc finger 1                             | V | V |   |   | V |   | V | 4 |
| RNF165    | ring finger protein 165                                        | V | V |   |   | V |   | V | 4 |

|          |                                                                                     |   |   |   |   |   |   |   |   |
|----------|-------------------------------------------------------------------------------------|---|---|---|---|---|---|---|---|
| KAT6A    | Lysine Acetyltransferase 6A                                                         | V |   | V | V |   | V |   | 4 |
| C1GALT1  | core 1 synthase, glycoprotein-N-acetylgalactosamine 3-beta-galactosyltransferase, 1 | V | V |   | V | V |   |   | 4 |
| C11ORF57 | chromosome 11 open reading frame 57                                                 | V | V |   |   |   | V | V | 4 |
| NADK     | NAD kinase                                                                          | V |   |   | V | V |   | V | 4 |
| VTI1A    | vesicle transport through interaction with t-SNAREs 1A                              | V | V | V |   | V |   |   | 4 |
| NAP1L5   | nucleosome assembly protein 1-like 5                                                | V | V |   | V |   |   | V | 4 |
| SKIDA1   | SKI/DACH Domain Containing 1                                                        | V | V |   |   | V |   | V | 4 |
| RNF111   | ring finger protein 111                                                             | V | V |   |   | V |   | V | 4 |
| BZRAP1   | benzodiazapine receptor (peripheral) associated protein 1                           | V | V | V |   | V |   |   | 4 |
| BTAF1    | BTAF1 RNA polymerase II, B-TFIID transcription factor-associated, 170kDa            | V | V |   | V |   |   | V | 4 |
| WIPF2    | WAS/WASL interacting protein family, member 2                                       | V | V |   |   | V |   | V | 4 |
| BOLL     | boule-like RNA-binding protein                                                      | V |   |   | V |   | V | V | 4 |
| BHLHE22  | Basic Helix-Loop-Helix Family Member E22                                            | V | V |   |   | V | V |   | 4 |
| RICTOR   | RPTOR independent companion of MTOR, complex 2                                      | V | V |   |   | V |   | V | 4 |
| XPNPEP3  | X-prolyl aminopeptidase (aminopeptidase P) 3, putative                              | V | V |   |   |   | V | V | 4 |
| YES1     | v-yes-1 Yamaguchi sarcoma viral oncogene homolog 1                                  | V |   |   | V |   | V | V | 4 |
| BCL11B   | B-cell CLL/lymphoma 11B (zinc finger protein)                                       | V |   |   |   | V | V | V | 4 |
| ATP6V1A  | ATPase, H+ transporting, lysosomal 70kDa, V1 subunit A                              | V | V |   |   | V |   | V | 4 |
| RGAG1    | retrotransposon gag domain containing 1                                             | V | V |   | V |   | V |   | 4 |
| NOTCH2   | notch 2                                                                             | V | V | V |   |   | V |   | 4 |
| ZNF146   | zinc finger protein 146                                                             | V | V | V | V |   |   |   | 4 |
| NPTX1    | neuronal pentraxin I                                                                | V |   | V | V |   | V |   | 4 |
| ARHGEF3  | Rho guanine nucleotide exchange factor (GEF) 3                                      | V | V |   |   |   | V | V | 4 |
| ARHGEF18 | Rho/Rac guanine nucleotide exchange factor (GEF) 18                                 | V |   | V | V |   | V |   | 4 |
| ZNF217   | zinc finger protein 217                                                             | V |   | V | V |   |   | V | 4 |
| NR4A3    | nuclear receptor subfamily 4, group A, member 3                                     | V | V |   |   | V |   | V | 4 |
| ARF3     | ADP-ribosylation factor 3                                                           | V | V |   | V |   |   | V | 4 |
| ZNF280D  | zinc finger protein 280D                                                            | V | V |   | V | V |   |   | 4 |
| ZNF580   | zinc finger protein 580                                                             | V | V |   | V |   |   | V | 4 |
| ZZZ3     | zinc finger, ZZ-type containing 3                                                   | V | V |   |   | V |   | V | 4 |
| NXT2     | nuclear transport factor 2-like export factor 2                                     | V | V |   |   |   | V | V | 4 |
| PUM2     | pumilio RNA-binding family member 2                                                 | V | V |   | V | V |   |   | 4 |
| ORC6     | Origin Recognition Complex Subunit 6                                                | V | V | V |   |   | V |   | 4 |
| PTPRT    | protein tyrosine phosphatase, receptor type, T                                      | V | V |   |   | V | V |   | 4 |
| OSBPL7   | oxysterol binding protein-like 7                                                    | V |   |   | V | V |   | V | 4 |
| BET1     | Bet1 golgi vesicular membrane trafficking protein                                   |   | V | V | V |   |   | V | 4 |
| CALM1    | calmodulin 1 (phosphorylase kinase, delta)                                          |   | V | V |   |   | V | V | 4 |
| CELSR3   | cadherin, EGF LAG seven-pass G-type receptor 3                                      |   | V | V | V | V |   |   | 4 |
| EIF1AX   | eukaryotic translation initiation factor 1A, X-linked                               |   | V |   | V | V |   | V | 4 |
| PALLD    | palladin, cytoskeletal associated protein                                           | V |   | V | V |   | V |   | 4 |

|         |                                                                                                   |   |   |   |   |   |   |   |   |
|---------|---------------------------------------------------------------------------------------------------|---|---|---|---|---|---|---|---|
| HMGXB4  | HMG-Box Containing 4                                                                              |   | V | V | V |   | V |   | 4 |
| PCDH17  | protocadherin 17                                                                                  | V | V |   |   | V |   | V | 4 |
| ACVR2B  | activin A receptor, type IIB                                                                      | V | V |   |   | V |   | V | 4 |
| PDCD4   | programmed cell death 4 (neoplastic transformation inhibitor)                                     | V |   |   | V |   | V | V | 4 |
| PTPRK   | protein tyrosine phosphatase, receptor type, K                                                    | V | V | V |   | V |   |   | 4 |
| ACAP2   | ArfGAP with coiled-coil, ankyrin repeat and PH domains 2                                          | V | V |   | V |   |   | V | 4 |
| MYEF2   | myelin expression factor 2                                                                        |   | V |   |   | V | V | V | 4 |
| PEA15   | phosphoprotein enriched in astrocytes 15                                                          | V | V |   |   | V |   | V | 4 |
| NDFIP2  | Nedd4 family interacting protein 2                                                                |   | V |   |   | V | V | V | 4 |
| ABHD2   | abhydrolase domain containing 2                                                                   | V |   | V |   | V |   | V | 4 |
| PGAM1   | phosphoglycerate mutase 1 (brain)                                                                 | V |   | V | V |   |   | V | 4 |
| PTPN1   | protein tyrosine phosphatase, non-receptor type 1                                                 | V |   | V |   | V |   | V | 4 |
| CDK14   | Cyclin Dependent Kinase 14                                                                        |   | V |   | V |   | V | V | 4 |
| SEC22B  | SEC22 vesicle trafficking protein homolog B (S. cerevisiae) (gene/pseudogene)                     |   | V | V |   | V |   | V | 4 |
| PHC2    | polyhomeotic homolog 2 (Drosophila)                                                               | V |   | V | V |   | V |   | 4 |
| SMARCA4 | SWI/SNF related, matrix associated, actin dependent regulator of chromatin, subfamily a, member 4 |   | V | V | V |   |   | V | 4 |
| PHF6    | PHD finger protein 6                                                                              | V | V |   | V | V |   |   | 4 |
| FSTL1   | follistatin-like 1                                                                                | V | V |   |   |   | V |   | 4 |
| PHLPP2  | PH Domain And Leucine Rich Repeat Protein Phosphatase 2                                           | V |   |   |   | V | V | V | 4 |
| PIAS3   | protein inhibitor of activated STAT, 3                                                            | V | V |   | V |   |   | V | 4 |
| GPR6    | G protein-coupled receptor 6                                                                      | V | V |   |   | V |   | V | 4 |
| PREX1   | phosphatidylinositol-3,4,5-trisphosphate-dependent Rac exchange factor 1                          | V | V | V |   |   |   | V | 4 |
| PPIB    | peptidylprolyl isomerase B (cyclophilin B)                                                        | V |   |   | V | V |   | V | 4 |
| POLDIP3 | polymerase (DNA-directed), delta interacting protein 3                                            | V |   |   | V | V |   | V | 4 |
| POLA1   | polymerase (DNA directed), alpha 1, catalytic subunit                                             | V |   | V | V |   |   | V | 4 |
| POGK    | pogo transposable element with KRAB domain                                                        | V | V |   | V |   |   | V | 4 |
| PLEKHO2 | pleckstrin homology domain containing, family O member 2                                          | V | V |   |   | V |   | V | 4 |
| PLEKHA7 | pleckstrin homology domain containing, family A member 7                                          | V | V |   |   |   |   | V | 3 |
| PLEK    | pleckstrin                                                                                        | V | V |   |   |   | V |   | 3 |
| PLAG1   | pleiomorphic adenoma gene 1                                                                       | V |   |   | V |   |   | V | 3 |
| PIKFYVE | Phosphoinositide Kinase, FYVE-Type Zinc Finger Containing                                         | V | V |   |   |   | V |   | 3 |
| PPP1R9A | protein phosphatase 1, regulatory subunit 9A                                                      | V | V |   |   | V |   |   | 3 |
| PPP2R5C | protein phosphatase 2, regulatory subunit B', gamma                                               | V | V |   |   |   | V |   | 3 |
| PRDM16  | PR domain containing 16                                                                           | V |   |   | V |   | V |   | 3 |
| PIM1    | pim-1 oncogene                                                                                    | V |   | V | V |   |   |   | 3 |
| PRKACB  | protein kinase, cAMP-dependent, catalytic, beta                                                   | V |   | V | V |   |   |   | 3 |
| PRKCE   | protein kinase C, epsilon                                                                         | V |   | V |   |   |   | V | 3 |
| PHKG2   | phosphorylase kinase, gamma 2 (testis)                                                            | V |   | V | V |   |   |   | 3 |
| PRLR    | prolactin receptor                                                                                | V |   | V | V |   |   |   | 3 |
| PHC3    | polyhomeotic homolog 3 (Drosophila)                                                               | V | V |   |   | V |   |   | 3 |

|           |                                                                                       |   |   |   |   |   |   |   |   |   |
|-----------|---------------------------------------------------------------------------------------|---|---|---|---|---|---|---|---|---|
| PTGIR     | prostaglandin I2 (prostacyclin) receptor (IP)                                         | V | V | V |   |   |   |   |   | 3 |
| PTGS1     | prostaglandin-endoperoxide synthase 1 (prostaglandin G/H synthase and cyclooxygenase) | V | V |   |   |   |   | V |   | 3 |
| PGM5      | phosphoglucomutase 5                                                                  | V | V | V |   |   |   |   |   | 3 |
| PGD       | phosphogluconate dehydrogenase                                                        | V |   | V |   |   |   |   | V | 3 |
| PTPRF     | protein tyrosine phosphatase, receptor type, F                                        | V | V |   |   |   |   | V |   | 3 |
| PECAM1    | platelet/endothelial cell adhesion molecule 1                                         | V | V | V |   |   |   |   |   | 3 |
| PDE5A     | phosphodiesterase 5A, cGMP-specific                                                   | V | V | V |   |   |   |   |   | 3 |
| PTPRS     | protein tyrosine phosphatase, receptor type, S                                        | V |   |   |   |   |   | V | V | 3 |
| OSBP      | oxysterol binding protein                                                             | V |   |   |   |   | V |   | V | 3 |
| OLFML2A   | olfactomedin-like 2A                                                                  | V |   |   |   |   | V |   | V | 3 |
| NUP50     | nucleoporin 50kDa                                                                     | V |   |   |   |   |   | V | V | 3 |
| QSER1     | glutamine and serine rich 1                                                           | V | V |   |   |   |   | V |   | 3 |
| RAB11FIP4 | RAB11 family interacting protein 4 (class II)                                         | V | V |   |   |   |   |   | V | 3 |
| RAB31P    | RAB3A interacting protein                                                             | V | V |   |   |   |   |   | V | 3 |
| NSF       | N-ethylmaleimide-sensitive factor                                                     | V |   |   | V | V |   |   |   | 3 |
| RALA      | v-ral simian leukemia viral oncogene homolog A (ras related)                          | V |   |   | V | V |   |   |   | 3 |
| RAP1A     | RAP1A, member of RAS oncogene family                                                  | V |   |   |   | V |   |   | V | 3 |
| RAPGEF2   | Rap guanine nucleotide exchange factor (GEF) 2                                        | V |   |   |   |   |   | V | V | 3 |
| RAPH1     | Ras association (RalGDS/AF-6) and pleckstrin homology domains 1                       | V | V |   |   |   |   |   | V | 3 |
| NRCAM     | neuronal cell adhesion molecule                                                       | V |   |   |   | V |   | V |   | 3 |
| NR3C1     | nuclear receptor subfamily 3, group C, member 1 (glucocorticoid receptor)             | V | V |   |   |   |   | V |   | 3 |
| RBM33     | RNA binding motif protein 33                                                          | V | V |   |   |   |   |   | V | 3 |
| NR1H3     | nuclear receptor subfamily 1, group H, member 3                                       | V |   |   |   | V |   |   | V | 3 |
| RERE      | arginine-glutamic acid dipeptide (RE) repeats                                         | V |   |   |   |   |   | V | V | 3 |
| NMT2      | N-myristoyltransferase 2                                                              | V |   |   |   | V |   |   | V | 3 |
| NET1      | neuroepithelial cell transforming 1                                                   | V | V |   |   |   |   |   | V | 3 |
| NECAB1    | N-terminal EF-hand calcium binding protein 1                                          | V |   |   |   | V |   |   | V | 3 |
| RIMS4     | regulating synaptic membrane exocytosis 4                                             | V |   |   |   | V |   |   | V | 3 |
| NCOA1     | nuclear receptor coactivator 1                                                        | V | V |   |   |   |   |   | V | 3 |
| NCBP1     | nuclear cap binding protein subunit 1, 80kDa                                          | V |   |   | V |   |   |   | V | 3 |
| NAALADL2  | N-acetylated alpha-linked acidic dipeptidase-like 2                                   | V |   |   |   | V |   |   | V | 3 |
| RNF141    | ring finger protein 141                                                               | V | V |   |   |   |   |   | V | 3 |
| RNF145    | ring finger protein 145                                                               | V | V |   |   |   |   | V |   | 3 |
| MYO15A    | myosin XVA                                                                            | V |   |   | V |   |   |   | V | 3 |
| PPP1R3B   | protein phosphatase 1, regulatory subunit 3B                                          |   |   |   |   |   |   | V | V | 3 |
| MTMR12    | myotubularin related protein 12                                                       | V | V |   |   |   |   |   | V | 3 |
| MT1G      | metallothionein 1G                                                                    | V | V | V |   |   |   |   |   | 3 |
| MSRB3     | methionine sulfoxide reductase B3                                                     | V | V | V |   |   |   |   |   | 3 |
| RP2       | retinitis pigmentosa 2 (X-linked recessive)                                           | V | V |   |   |   |   |   | V | 3 |
| RPA1      | replication protein A1, 70kDa                                                         | V |   |   | V |   |   | V |   | 3 |

|          |                                                                                        |   |   |   |   |   |   |   |   |
|----------|----------------------------------------------------------------------------------------|---|---|---|---|---|---|---|---|
| RPE      | ribulose-5-phosphate-3-epimerase                                                       | V |   | V | V |   |   |   | 3 |
| RPRD1A   | regulation of nuclear pre-mRNA domain containing 1A                                    | V | V |   |   |   | V |   | 3 |
| RPS6KA5  | ribosomal protein S6 kinase, 90kDa, polypeptide 5                                      | V | V | V |   |   |   |   | 3 |
| MS4A1    | membrane-spanning 4-domains, subfamily A, member 1                                     | V | V |   |   |   | V |   | 3 |
| MRAS     | muscle RAS oncogene homolog                                                            | V |   |   |   | V |   | V | 3 |
| MPZL1    | myelin protein zero-like 1                                                             | V | V | V |   |   |   |   | 3 |
| RSPO1    | R-spondin 1                                                                            | V | V |   |   |   | V |   | 3 |
| MOB3B    | MOB Kinase Activator 3B                                                                | V | V |   |   |   | V |   | 3 |
| RTKN2    | rhotekin 2                                                                             | V | V |   |   | V |   |   | 3 |
| RTN3     | reticulon 3                                                                            | V |   |   |   |   | V | V | 3 |
| MKL2     | MKL/myocardin-like 2                                                                   | V | V |   |   |   |   | V | 3 |
| MKL1     | megakaryoblastic leukemia (translocation) 1                                            | V |   |   | V |   |   | V | 3 |
| SAMSN1   | SAM domain, SH3 domain and nuclear localization signals 1                              | V | V |   |   |   | V |   | 3 |
| SATB2    | SATB homeobox 2                                                                        | V | V |   |   |   | V |   | 3 |
| SEC61A1  | Sec61 alpha 1 subunit (S. cerevisiae)                                                  | V |   |   | V |   |   | V | 3 |
| MINK1    | misshapen-like kinase 1                                                                | V | V |   |   | V |   |   | 3 |
| MGAT4A   | mannosyl (alpha-1,3-)-glycoprotein beta-1,4-N-acetylglucosaminyltransferase, isozyme A | V | V |   |   |   |   | V | 3 |
| MEA1     | male-enhanced antigen 1                                                                | V | V |   | V |   |   |   | 3 |
| SEPT2    | septin 2                                                                               | V |   | V |   |   |   | V | 3 |
| MCHR1    | melanin-concentrating hormone receptor 1                                               | V |   | V |   |   |   | V | 3 |
| SERPINB8 | serpin peptidase inhibitor, clade B (ovalbumin), member 8                              | V | V | V |   |   |   |   | 3 |
| MAP2     | microtubule-associated protein 2                                                       | V | V | V |   |   |   |   | 3 |
| LRRK1    | leucine-rich repeat kinase 1                                                           | V | V |   |   |   | V |   | 3 |
| SFRP2    | secreted frizzled-related protein 2                                                    | V | V |   |   |   | V |   | 3 |
| LRRC16A  | leucine rich repeat containing 16A                                                     | V | V |   |   | V |   |   | 3 |
| LRP8     | low density lipoprotein receptor-related protein 8, apolipoprotein e receptor          | V | V | V |   |   |   |   | 3 |
| SCAF11   | SR-Related CTD Associated Factor 11                                                    | V | V |   |   |   |   | V | 3 |
| LPP      | LIM domain containing preferred translocation partner in lipoma                        | V | V |   | V |   |   |   | 3 |
| LMBR1    | limb development membrane protein 1                                                    | V |   |   |   | V |   | V | 3 |
| LITAF    | lipopolysaccharide-induced TNF factor                                                  | V | V | V |   |   |   |   | 3 |
| LIPI     | lipase, member I                                                                       | V | V |   |   |   | V |   | 3 |
| LHX9     | LIM homeobox 9                                                                         | V |   |   |   | V | V |   | 3 |
| SLC10A7  | solute carrier family 10, member 7                                                     | V |   |   |   | V |   | V | 3 |
| LETM1    | leucine zipper-EF-hand containing transmembrane protein 1                              | V |   |   | V |   |   | V | 3 |
| LAMC2    | laminin, gamma 2                                                                       | V | V |   |   |   | V |   | 3 |
| SLC1A2   | solute carrier family 1 (glial high affinity glutamate transporter), member 2          | V | V |   |   |   | V |   | 3 |
| KRAS     | Kirsten rat sarcoma viral oncogene homolog                                             | V |   | V |   |   |   | V | 3 |
| SLC25A1  | solute carrier family 25 (mitochondrial carrier; citrate transporter), member 1        | V |   | V | V |   |   |   | 3 |
| KIF3C    | kinesin family member 3C                                                               | V | V |   |   | V |   |   | 3 |
| G2E3     | G2/M-Phase Specific E3 Ubiquitin Protein Ligase                                        | V |   |   |   |   | V | V | 3 |

|          |                                                                                                                 |   |   |   |  |   |   |   |   |
|----------|-----------------------------------------------------------------------------------------------------------------|---|---|---|--|---|---|---|---|
| PHF24    | PHD Finger Protein 24                                                                                           | V | V |   |  |   |   | V | 3 |
| KCTD10   | potassium channel tetramerization domain containing 10                                                          | V |   |   |  | V |   | V | 3 |
| KCNJ2    | potassium inwardly-rectifying channel, subfamily J, member 2                                                    | V | V |   |  |   |   | V | 3 |
| SLC37A3  | solute carrier family 37, member 3                                                                              | V |   |   |  | V |   | V | 3 |
| SLC38A2  | solute carrier family 38, member 2                                                                              | V |   | V |  | V |   |   | 3 |
| KCNJ15   | potassium inwardly-rectifying channel, subfamily J, member 15                                                   | V | V |   |  |   |   | V | 3 |
| KCNE1    | potassium voltage-gated channel, Isk-related family, member 1                                                   | V | V | V |  |   |   |   | 3 |
| KDM5C    | Lysine Demethylase 5C                                                                                           | V |   | V |  |   |   | V | 3 |
| ITGB3    | integrin, beta 3 (platelet glycoprotein IIIa, antigen CD61)                                                     | V |   | V |  | V |   |   | 3 |
| SLC6A20  | solute carrier family 6 (proline IMINO transporter), member 20                                                  | V |   | V |  |   |   | V | 3 |
| SLC7A2   | solute carrier family 7 (cationic amino acid transporter, y+ system), member 2                                  | V |   | V |  |   |   | V | 3 |
| ISL2     | ISL LIM homeobox 2                                                                                              | V |   |   |  |   |   | V | 3 |
| INTS2    | integrator complex subunit 2                                                                                    | V | V |   |  |   | V |   | 3 |
| SLC8A2   | solute carrier family 8 (sodium/calcium exchanger), member 2                                                    | V |   |   |  |   | V | V | 3 |
| ILDR1    | immunoglobulin-like domain containing receptor 1                                                                | V | V |   |  |   |   | V | 3 |
| SMARCAD1 | SWI/SNF-related, matrix-associated actin-dependent regulator of chromatin, subfamily a, containing DEAD/H box 1 | V | V |   |  | V |   |   | 3 |
| IKBKB    | inhibitor of kappa light polypeptide gene enhancer in B-cells, kinase beta                                      | V |   | V |  |   |   | V | 3 |
| ID4      | inhibitor of DNA binding 4, dominant negative helix-loop-helix protein                                          | V |   | V |  | V |   |   | 3 |
| HLTF     | helicase-like transcription factor                                                                              | V | V |   |  |   |   | V | 3 |
| HIPK1    | homeodomain interacting protein kinase 1                                                                        | V | V |   |  |   | V |   | 3 |
| HECW2    | HECT, C2 and WW domain containing E3 ubiquitin protein ligase 2                                                 | V | V |   |  |   |   | V | 3 |
| GYP A    | glycophorin A (MNS blood group)                                                                                 | V | V |   |  |   |   | V | 3 |
| GRPEL2   | GrpE-like 2, mitochondrial (E. coli)                                                                            | V | V |   |  |   |   | V | 3 |
| SNED1    | sushi, nidogen and EGF-like domains 1                                                                           | V |   |   |  |   |   | V | 3 |
| GPR125   | G protein-coupled receptor 125                                                                                  | V |   |   |  |   | V | V | 3 |
| SOX5     | SRY (sex determining region Y)-box 5                                                                            | V | V |   |  |   | V |   | 3 |
| GOLPH3   | golgi phosphoprotein 3 (coat-protein)                                                                           | V |   |   |  | V |   | V | 3 |
| GNPNAT1  | glucosamine-phosphate N-acetyltransferase 1                                                                     | V |   |   |  | V |   | V | 3 |
| GNE      | glucosamine (UDP-N-acetyl)-2-epimerase/N-acetylmannosamine kinase                                               | V |   | V |  |   |   | V | 3 |
| GNB1     | guanine nucleotide binding protein (G protein), beta polypeptide 1                                              | V |   | V |  | V |   |   | 3 |
| SPEG     | SPEG complex locus                                                                                              | V |   |   |  |   | V | V | 3 |
| SPHK2    | sphingosine kinase 2                                                                                            | V |   | V |  |   |   | V | 3 |
| GLS      | glutaminase                                                                                                     | V | V |   |  |   |   | V | 3 |
| SPRY3    | sprouty homolog 3 (Drosophila)                                                                                  | V | V |   |  |   |   | V | 3 |
| GLIS2    | GLIS family zinc finger 2                                                                                       | V |   |   |  |   | V | V | 3 |
| SRC      | v-src avian sarcoma (Schmidt-Ruppin A-2) viral oncogene homolog                                                 | V | V |   |  |   |   | V | 3 |
| SRGAP3   | SLIT-ROBO Rho GTPase activating protein 3                                                                       | V | V | V |  |   |   |   | 3 |
| GK5      | glycerol kinase 5 (putative)                                                                                    | V | V |   |  |   |   | V | 3 |
| GIMAP6   | GTPase, IMAP family member 6                                                                                    | V | V |   |  |   |   | V | 3 |
| SSR1     | signal sequence receptor, alpha                                                                                 | V | V | V |  |   |   |   | 3 |

|          |                                                                |   |   |   |   |  |   |   |   |   |
|----------|----------------------------------------------------------------|---|---|---|---|--|---|---|---|---|
| STAG2    | stromal antigen 2                                              | V | V |   | V |  |   |   |   | 3 |
| STARD7   | StAR-related lipid transfer (START) domain containing 7        | V | V |   |   |  |   | V |   | 3 |
| GH2      | growth hormone 2                                               | V | V |   |   |  | V |   |   | 3 |
| STK3     | serine/threonine kinase 3                                      | V | V | V |   |  |   |   |   | 3 |
| GCH1     | GTP cyclohydrolase 1                                           | V | V |   | V |  |   |   |   | 3 |
| STX12    | syntaxin 12                                                    | V | V |   |   |  | V |   |   | 3 |
| STX6     | syntaxin 6                                                     | V |   | V |   |  |   | V |   | 3 |
| GAS2L1   | growth arrest-specific 2 like 1                                | V |   |   | V |  |   | V |   | 3 |
| SYNJ2    | synaptojanin 2                                                 | V |   | V | V |  |   |   |   | 3 |
| GALNT15  | Polypeptide N-Acetylgalactosaminyltransferase 15               | V | V |   |   |  |   | V |   | 3 |
| GAD2     | glutamate decarboxylase 2 (pancreatic islets and brain, 65kDa) | V | V | V |   |  |   |   |   | 3 |
| GABBR2   | gamma-aminobutyric acid (GABA) B receptor, 2                   | V | V |   |   |  |   |   | V | 3 |
| G6PD     | glucose-6-phosphate dehydrogenase                              | V |   | V |   |  |   |   | V | 3 |
| FYB      | FYN binding protein                                            | V |   | V |   |  |   |   | V | 3 |
| FUT9     | fucosyltransferase 9 (alpha (1,3) fucosyltransferase)          | V | V | V |   |  |   |   |   | 3 |
| FRK      | fyn-related kinase                                             | V | V | V |   |  |   |   |   | 3 |
| FMNL2    | formin-like 2                                                  | V | V |   |   |  | V |   |   | 3 |
| TERF2    | telomeric repeat binding factor 2                              | V | V | V |   |  |   |   |   | 3 |
| FLI1     | Fli-1 proto-oncogene, ETS transcription factor                 | V | V |   |   |  | V |   |   | 3 |
| FKTN     | fukutin                                                        | V | V |   |   |  |   | V |   | 3 |
| FCHSD2   | FCH and double SH3 domains 2                                   | V | V |   |   |  |   | V |   | 3 |
| TGIF1    | TGFB-induced factor homeobox 1                                 | V |   | V | V |  |   |   |   | 3 |
| FAM155B  | family with sequence similarity 155, member B                  | V | V |   |   |  | V |   |   | 3 |
| FAM131B  | family with sequence similarity 131, member B                  | V | V |   |   |  |   | V |   | 3 |
| FAM107B  | family with sequence similarity 107, member B                  | V |   |   |   |  |   | V | V | 3 |
| FAM102A  | family with sequence similarity 102, member A                  | V |   |   |   |  |   | V | V | 3 |
| FAF2     | Fas associated factor family member 2                          | V | V |   |   |  |   |   | V | 3 |
| TKT      | transketolase                                                  | V |   | V | V |  |   |   |   | 3 |
| EDA      | ectodysplasin A                                                | V | V | V |   |  |   |   |   | 3 |
| DPY19L4  | dpy-19-like 4 (C. elegans)                                     | V | V |   |   |  |   | V |   | 3 |
| DNM3     | dynamin 3                                                      | V | V |   |   |  |   | V |   | 3 |
| DMRT2    | doublesex and mab-3 related transcription factor 2             | V |   |   | V |  |   | V |   | 3 |
| TMEM39A  | transmembrane protein 39A                                      | V | V |   |   |  |   | V |   | 3 |
| DLD      | dihydrolipoamide dehydrogenase                                 | V | V | V |   |  |   |   |   | 3 |
| DLC1     | deleted in liver cancer 1                                      | V |   | V | V |  |   |   |   | 3 |
| DGKZ     | diacylglycerol kinase, zeta                                    | V |   | V | V |  |   |   |   | 3 |
| TMSB4XP8 | Thymosin Beta 4, X-Linked Pseudogene 8                         | V | V |   |   |  |   |   | V | 3 |
| DGKH     | diacylglycerol kinase, eta                                     | V | V |   |   |  | V |   |   | 3 |
| DDX3Y    | DEAD (Asp-Glu-Ala-Asp) box helicase 3, Y-linked                | V | V |   |   |  |   | V |   | 3 |
| DAP      | death-associated protein                                       | V | V |   |   |  |   |   | V | 3 |

|          |                                                                        |   |   |   |  |   |   |   |   |   |
|----------|------------------------------------------------------------------------|---|---|---|--|---|---|---|---|---|
| CYP4B1   | cytochrome P450, family 4, subfamily B, polypeptide 1                  | V | V | V |  |   |   |   |   | 3 |
| TPPP     | tubulin polymerization promoting protein                               | V |   | V |  |   |   |   | V | 3 |
| CYP11B1  | cytochrome P450, family 11, subfamily B, polypeptide 1                 | V | V | V |  |   |   |   |   | 3 |
| CTNNA2   | catenin (cadherin-associated protein), alpha 2                         | V | V |   |  |   |   | V |   | 3 |
| CTCFL    | CCCTC-binding factor (zinc finger protein)-like                        | V | V |   |  |   |   | V |   | 3 |
| CTBP2    | C-terminal binding protein 2                                           | V |   |   |  |   | V |   | V | 3 |
| TSPAN4   | tetraspanin 4                                                          | V |   |   |  | V |   |   | V | 3 |
| TSPAN9   | tetraspanin 9                                                          | V |   |   |  |   | V |   | V | 3 |
| CSTA     | cystatin A (stefin A)                                                  | V | V | V |  |   |   |   |   | 3 |
| CSNK1G1  | casein kinase 1, gamma 1                                               | V | V |   |  |   | V |   |   | 3 |
| CPM      | carboxypeptidase M                                                     | V |   | V |  |   |   | V |   | 3 |
| CPA4     | carboxypeptidase A4                                                    | V | V |   |  |   |   |   | V | 3 |
| CLOCK    | clock circadian regulator                                              | V | V |   |  | V |   |   |   | 3 |
| CHL1     | cell adhesion molecule L1-like                                         | V | V |   |  |   |   | V |   | 3 |
| CDON     | cell adhesion associated, oncogene regulated                           | V | V |   |  |   |   |   | V | 3 |
| CD28     | CD28 molecule                                                          | V | V | V |  |   |   |   |   | 3 |
| CAV2     | caveolin 2                                                             | V | V | V |  |   |   |   |   | 3 |
| UNC50    | unc-50 homolog (C. elegans)                                            | V |   |   |  |   | V |   | V | 3 |
| CAPZA1   | capping protein (actin filament) muscle Z-line, alpha 1                | V | V |   |  |   | V |   |   | 3 |
| CAND1    | cullin-associated and neddylation-dissociated 1                        | V | V |   |  |   |   | V |   | 3 |
| CAMK2G   | calcium/calmodulin-dependent protein kinase II gamma                   | V | V |   |  | V |   |   |   | 3 |
| C7ORF60  | chromosome 7 open reading frame 60                                     | V | V |   |  |   | V |   |   | 3 |
| VAPA     | VAMP (vesicle-associated membrane protein)-associated protein A, 33kDa | V |   |   |  |   |   | V | V | 3 |
| C6ORF120 | chromosome 6 open reading frame 120                                    | V | V |   |  |   | V |   |   | 3 |
| VAT1     | vesicle amine transport 1                                              | V | V |   |  |   |   |   | V | 3 |
| EVA1C    | Eva-1 Homolog C                                                        | V | V |   |  |   |   | V |   | 3 |
| CCSAP    | Centriole, Cilia And Spindle Associated Protein                        | V |   |   |  | V |   |   | V | 3 |
| TICRR    | TOPBP1 Interacting Checkpoint And Replication Regulator                | V |   |   |  | V |   | V |   | 3 |
| VPS45    | vacuolar protein sorting 45 homolog (S. cerevisiae)                    | V |   |   |  |   | V |   | V | 3 |
| VSIG1    | V-set and immunoglobulin domain containing 1                           | V | V |   |  |   |   | V |   | 3 |
| WBP1L    | WW Domain Binding Protein 1 Like                                       | V |   |   |  |   | V |   | V | 3 |
| WDFY1    | WD repeat and FYVE domain containing 1                                 | V | V | V |  |   |   |   |   | 3 |
| BTRC     | beta-transducin repeat containing E3 ubiquitin protein ligase          | V | V |   |  |   |   | V |   | 3 |
| BRWD1    | bromodomain and WD repeat domain containing 1                          | V | V |   |  |   |   | V |   | 3 |
| WDR6     | WD repeat domain 6                                                     | V |   |   |  | V |   |   | V | 3 |
| WDR61    | WD repeat domain 61                                                    | V |   | V |  | V |   |   |   | 3 |
| WEE1     | WEE1 G2 checkpoint kinase                                              | V | V |   |  |   | V |   |   | 3 |
| BPNT1    | 3'(2'), 5'-bisphosphate nucleotidase 1                                 | V |   |   |  | V |   |   | V | 3 |
| BICD1    | bicaudal D homolog 1 (Drosophila)                                      | V | V |   |  |   | V |   |   | 3 |
| WSCD2    | WSC domain containing 2                                                | V | V |   |  |   |   |   | V | 3 |

|          |                                                                            |   |   |   |   |   |   |   |   |
|----------|----------------------------------------------------------------------------|---|---|---|---|---|---|---|---|
| BCMO1    | beta-carotene 15,15'-monooxygenase 1                                       | V |   | V | V |   |   |   | 3 |
| XPO6     | exportin 6                                                                 | V |   |   | V |   |   | V | 3 |
| BCL2L2   | BCL2-like 2                                                                | V | V |   |   |   | V |   | 3 |
| YPEL2    | yippee-like 2 (Drosophila)                                                 | V |   |   |   | V |   | V | 3 |
| BAAT     | bile acid CoA: amino acid N-acyltransferase (glycine N-choloyltransferase) | V | V |   |   | V |   |   | 3 |
| ATP6V1B2 | ATPase, H+ transporting, lysosomal 56/58kDa, V1 subunit B2                 | V |   |   | V |   |   | V | 3 |
| ZBTB26   | zinc finger and BTB domain containing 26                                   | V | V |   |   | V |   |   | 3 |
| ASRGL1   | asparaginase like 1                                                        | V | V |   |   | V |   |   | 3 |
| ZBTB6    | zinc finger and BTB domain containing 6                                    | V | V |   |   |   |   | V | 3 |
| ZC3H14   | zinc finger CCCH-type containing 14                                        | V | V |   |   |   | V |   | 3 |
| ZC3H7B   | zinc finger CCCH-type containing 7B                                        | V |   |   |   | V |   | V | 3 |
| ZC3HAV1  | zinc finger CCCH-type, antiviral 1                                         | V | V |   |   |   | V |   | 3 |
| ZFP91    | ZFP91 zinc finger protein                                                  | V |   |   | V |   |   | V | 3 |
| ASPH     | aspartate beta-hydroxylase                                                 | V | V |   |   |   |   | V | 3 |
| ASH1L    | ash1 (absent, small, or homeotic)-like (Drosophila)                        | V |   | V |   |   |   | V | 3 |
| ZMYND11  | zinc finger, MYND-type containing 11                                       | V | V |   |   |   |   | V | 3 |
| ARPC1A   | actin related protein 2/3 complex, subunit 1A, 41kDa                       | V |   | V | V |   |   |   | 3 |
| ZNF215   | zinc finger protein 215                                                    | V | V | V |   |   |   |   | 3 |
| ARFIP1   | ADP-ribosylation factor interacting protein 1                              | V | V |   |   | V |   |   | 3 |
| APPBP2   | amyloid beta precursor protein (cytoplasmic tail) binding protein 2        | V | V |   |   |   | V |   | 3 |
| ZNF24    | zinc finger protein 24                                                     | V |   | V |   |   |   | V | 3 |
| ZNF280C  | zinc finger protein 280C                                                   | V | V |   |   |   | V |   | 3 |
| AP1S3    | adaptor-related protein complex 1, sigma 3 subunit                         | V | V | V |   |   |   |   | 3 |
| ZNF281   | zinc finger protein 281                                                    | V |   | V | V |   |   |   | 3 |
| ZNF365   | zinc finger protein 365                                                    | V | V |   |   |   | V |   | 3 |
| ZNF398   | zinc finger protein 398                                                    | V | V |   |   | V |   |   | 3 |
| ANXA13   | annexin A13                                                                | V | V | V |   |   |   |   | 3 |
| ZNF652   | zinc finger protein 652                                                    | V |   |   |   |   | V | V | 3 |
| ZNF800   | zinc finger protein 800                                                    | V | V |   | V |   |   |   | 3 |
| ANO1     | anoctamin 1, calcium activated chloride channel                            | V |   |   |   |   | V | V | 3 |
| ANKRD29  | ankyrin repeat domain 29                                                   | V | V |   | V |   |   |   | 3 |
| ANKRD23  | ankyrin repeat domain 23                                                   | V |   |   | V |   |   | V | 3 |
| AMPH     | amphiphysin                                                                | V |   | V | V |   |   |   | 3 |
| AKAP12   | A kinase (PRKA) anchor protein 12                                          | V |   | V | V |   |   |   | 3 |
| AGPAT1   | 1-acylglycerol-3-phosphate O-acyltransferase 1                             | V | V |   |   |   |   | V | 3 |
| AFF4     | AF4/FMR2 family, member 4                                                  | V | V | V |   |   |   |   | 3 |
| FGD4     | FYVE, RhoGEF and PH domain containing 4                                    |   | V |   |   | V |   | V | 3 |
| RALGAPA1 | Ral GTPase Activating Protein Catalytic Alpha Subunit 1                    |   | V |   |   | V |   | V | 3 |
| GXYLT1   | Glucoside Xylosyltransferase 1                                             |   | V |   |   |   | V | V | 3 |
| AFF2     | AF4/FMR2 family, member 2                                                  | V | V |   |   |   | V |   | 3 |
