# Supplementary material
Source: publisher figshare collection journal article supplement (https://tandf.figshare.com/articles/dataset/_/7477601)
Supplement: Supplementary file 1 [file 2 › ibmk_a_1508308_sm7119.pdf]

Supplemental Table S3. Mmu-miR-381-3p *in silico* predicted targets.

| TARGET GENE | GENE DESCRIPTION                                                                        | VALIDATION | DIANA | MIRANDA | MIRBRIDGE | PICTAR | PITA | RNA22 | TARGETSCAN | TOTAL_HIT |
|-------------|-----------------------------------------------------------------------------------------|------------|-------|---------|-----------|--------|------|-------|------------|-----------|
| KLF12       | Kruppel-like factor 12                                                                  |            | V     | V       |           |        | V    | V     | V          | 5         |
| LRRC4       | leucine rich repeat containing 4                                                        |            | V     | V       |           |        | V    | V     | V          | 5         |
| MBNL1       | muscleblind-like splicing regulator 1                                                   |            | V     | V       |           | V      | V    |       | V          | 5         |
| HIVEP2      | human immunodeficiency virus type I enhancer binding protein 2                          |            | V     | V       |           |        | V    | V     | V          | 5         |
| HIPK1       | homeodomain interacting protein kinase 1                                                |            | V     | V       |           |        | V    | V     | V          | 5         |
| NR5A2       | nuclear receptor subfamily 5, group A, member 2                                         |            | V     | V       |           |        | V    | V     | V          | 5         |
| NRP2        | neuropilin 2                                                                            |            | V     | V       |           |        | V    | V     | V          | 5         |
| PCGF3       | polycomb group ring finger 3                                                            |            | V     | V       |           |        | V    | V     | V          | 5         |
| EPS8        | epidermal growth factor receptor pathway substrate 8                                    |            | V     | V       |           |        | V    | V     | V          | 5         |
| EPB41L1     | erythrocyte membrane protein band 4.1-like 1                                            |            | V     | V       |           |        | V    | V     | V          | 5         |
| EML1        | echinoderm microtubule associated protein like 1                                        |            | V     | V       |           |        | V    | V     | V          | 5         |
| EIF2B5      | eukaryotic translation initiation factor 2B, subunit 5 epsilon, 82kDa                   |            | V     | V       |           |        | V    | V     | V          | 5         |
| RAC1        | ras-related C3 botulinum toxin substrate 1 (rho family, small GTP binding protein Rac1) |            | V     | V       |           |        | V    | V     | V          | 5         |
| KIF1B       | kinesin family member 1B                                                                |            | V     | V       |           |        | V    | V     | V          | 5         |
| YES1        | v-yes-1 Yamaguchi sarcoma viral oncogene homolog 1                                      |            | V     | V       |           |        | V    | V     | V          | 5         |
| SEMA6D      | sema domain, transmembrane domain (TM), and cytoplasmic domain, (semaphorin) 6D         |            | V     | V       |           | V      | V    |       | V          | 5         |
| SLC1A2      | solute carrier family 1 (glial high affinity glutamate transporter), member 2           |            | V     | V       |           |        | V    | V     | V          | 5         |
| SLC6A8      | solute carrier family 6 (neurotransmitter transporter), member 8                        |            | V     | V       |           |        | V    | V     | V          | 5         |
| SRGAP2      | SLIT-ROBO Rho GTPase activating protein 2                                               |            | V     | V       |           |        | V    | V     | V          | 5         |
| TEAD1       | TEA domain family member 1 (SV40 transcriptional enhancer factor)                       |            | V     | V       |           |        | V    | V     | V          | 5         |
| TMEM168     | transmembrane protein 168                                                               |            | V     | V       |           |        | V    | V     | V          | 5         |
| UBN1        | ubiquitin 1                                                                             |            | V     | V       |           |        | V    | V     | V          | 5         |
| VCPIP1      | valosin containing protein (p97)/p47 complex interacting protein 1                      |            | V     | V       |           |        | V    | V     | V          | 5         |
| VAPA        | VAMP (vesicle-associated membrane protein)-associated protein A, 33kDa                  |            | V     | V       |           |        | V    | V     | V          | 5         |
| USP34       | ubiquitin specific peptidase 34                                                         |            | V     | V       |           |        | V    |       | V          | 4         |
| ANO4        | anoctamin 4                                                                             |            | V     | V       |           |        | V    |       | V          | 4         |
| USP15       | ubiquitin specific peptidase 15                                                         |            | V     | V       |           |        | V    |       | V          | 4         |
| SPPL3       | Signal Peptide Peptidase Like 3                                                         |            | V     | V       |           |        | V    |       | V          | 4         |
| ARHGAP24    | Rho GTPase activating protein 24                                                        |            | V     | V       |           |        | V    |       | V          | 4         |
| UBR5        | ubiquitin protein ligase E3 component n-recognin 5                                      |            | V     | V       |           |        | V    |       | V          | 4         |
| UBR1        | ubiquitin protein ligase E3 component n-recognin 1                                      |            | V     | V       |           |        | V    |       | V          | 4         |
| ANKRD12     | ankyrin repeat domain 12                                                                |            | V     | V       |           |        | V    |       | V          | 4         |
| UBE4A       | ubiquitination factor E4A                                                               |            | V     | V       |           |        | V    |       | V          | 4         |
| UBE3A       | ubiquitin protein ligase E3A                                                            |            | V     | V       |           |        | V    |       | V          | 4         |
| ASXL2       | additional sex combs like 2 (Drosophila)                                                |            | V     | V       |           |        | V    |       | V          | 4         |
| ATP1B1      | ATPase, Na+/K+ transporting, beta 1 polypeptide                                         |            | V     | V       |           |        | V    |       | V          | 4         |

|          |                                                                       |   |   |   |   |   |
|----------|-----------------------------------------------------------------------|---|---|---|---|---|
| UBE2E2   | ubiquitin-conjugating enzyme E2E 2                                    | V | V | V | V | 4 |
| UBAP2L   | ubiquitin associated protein 2-like                                   | V | V | V | V | 4 |
| ATRN     | attractin                                                             | V | V | V | V | 4 |
| TRIM63   | tripartite motif containing 63, E3 ubiquitin protein ligase           | V | V | V | V | 4 |
| AZIN1    | antizyme inhibitor 1                                                  | V | V | V | V | 4 |
| TP53BP1  | tumor protein p53 binding protein 1                                   | V | V | V | V | 4 |
| VPS13B   | vacuolar protein sorting 13 homolog B (yeast)                         | V | V | V | V | 4 |
| TET3     | tet methylcytosine dioxygenase 3                                      | V | V | V | V | 4 |
| WAPAL    | wings apart-like homolog (Drosophila)                                 | V | V | V | V | 4 |
| BCL11A   | B-cell CLL/lymphoma 11A (zinc finger protein)                         | V | V | V | V | 4 |
| BCL11B   | B-cell CLL/lymphoma 11B (zinc finger protein)                         | V | V | V | V | 4 |
| TANC2    | tetratricopeptide repeat, ankyrin repeat and coiled-coil containing 2 | V | V | V | V | 4 |
| SYNCRIP  | synaptotagmin binding, cytoplasmic RNA interacting protein            | V | V | V | V | 4 |
| BIRC6    | baculoviral IAP repeat containing 6                                   | V | V | V | V | 4 |
| BIVM     | basic, immunoglobulin-like variable motif containing                  | V | V | V | V | 4 |
| SUV420H1 | suppressor of variegation 4-20 homolog 1 (Drosophila)                 | V | V | V | V | 4 |
| BNC2     | basonuclein 2                                                         | V | V | V | V | 4 |
| STX12    | syntaxin 12                                                           | V | V | V | V | 4 |
| STK38L   | serine/threonine kinase 38 like                                       | V | V | V | V | 4 |
| ST8SIA2  | ST8 alpha-N-acetyl-neuraminide alpha-2,8-sialyltransferase 2          | V | V | V | V | 4 |
| BTBD7    | BTB (POZ) domain containing 7                                         | V | V | V | V | 4 |
| SSH2     | slingshot protein phosphatase 2                                       | V | V | V | V | 4 |
| WDR37    | WD repeat domain 37                                                   | V | V | V | V | 4 |
| EMSY     | EMSY, BRCA2 Interacting Transcriptional Repressor                     | V | V | V | V | 4 |
| SPTSSA   | Serine Palmitoyltransferase Small Subunit A                           | V | V | V | V | 4 |
| KATNBL1  | Katanin Regulatory Subunit B1 Like 1                                  | V | V | V | V | 4 |
| SPRY4    | sprouty homolog 4 (Drosophila)                                        | V | V |   | V | 4 |
| C18ORF25 | chromosome 18 open reading frame 25                                   | V | V | V | V | 4 |
| SP1      | Sp1 transcription factor                                              | V | V | V | V | 4 |
| SOX4     | SRY (sex determining region Y)-box 4                                  | V | V | V | V | 4 |
| LURAP1L  | Leucine Rich Adaptor Protein 1 Like                                   | V | V | V | V | 4 |
| SOX2     | SRY (sex determining region Y)-box 2                                  | V | V | V | V | 4 |
| SORBS1   | sorbin and SH3 domain containing 1                                    | V | V | V | V | 4 |
| SOCS5    | suppressor of cytokine signaling 5                                    | V | V | V | V | 4 |
| SNX27    | sorting nexin family member 27                                        | V | V | V | V | 4 |
| SNRNP40  | small nuclear ribonucleoprotein 40kDa (U5)                            | V | V | V | V | 4 |
| SNRK     | SNF related kinase                                                    | V | V | V | V | 4 |
| SMEK2    | SMEK homolog 2, suppressor of mek1 (Dictyostelium)                    | V | V | V | V | 4 |
| SLMAP    | sarcolemma associated protein                                         | V | V | V | V | 4 |

|          |                                                                                        |   |   |   |   |   |
|----------|----------------------------------------------------------------------------------------|---|---|---|---|---|
| WEE1     | WEE1 G2 checkpoint kinase                                                              | V | V | V | V | 4 |
| CDC42BPA | CDC42 binding protein kinase alpha (DMPK-like)                                         | V | V | V | V | 4 |
| CDC73    | cell division cycle 73                                                                 | V | V | V | V | 4 |
| SLC24A3  | solute carrier family 24 (sodium/potassium/calcium exchanger), member 3                | V | V | V | V | 4 |
| WNT5A    | wingless-type MMTV integration site family, member 5A                                  | V | V | V | V | 4 |
| CHD2     | chromodomain helicase DNA binding protein 2                                            | V | V | V | V | 4 |
| CHD4     | chromodomain helicase DNA binding protein 4                                            | V | V | V | V | 4 |
| CHD9     | chromodomain helicase DNA binding protein 9                                            | V | V | V | V | 4 |
| SLC16A14 | solute carrier family 16, member 14                                                    | V | V | V | V | 4 |
| SIPA1L2  | signal-induced proliferation-associated 1 like 2                                       | V | V | V | V | 4 |
| CLCF1    | cardiotrophin-like cytokine factor 1                                                   | V | V | V | V | 4 |
| SIAH1    | siah E3 ubiquitin protein ligase 1                                                     | V | V | V | V | 4 |
| SHOX2    | short stature homeobox 2                                                               | V | V | V | V | 4 |
| SHANK2   | SH3 and multiple ankyrin repeat domains 2                                              | V | V | V | V | 4 |
| SH2B3    | SH2B adaptor protein 3                                                                 | V | V | V | V | 4 |
| SFRP2    | secreted frizzled-related protein 2                                                    | V | V | V | V | 4 |
| CNOT2    | CCR4-NOT transcription complex, subunit 2                                              | V | V | V | V | 4 |
| CNOT7    | CCR4-NOT transcription complex, subunit 7                                              | V | V | V | V | 4 |
| SEPT11   | septin 11                                                                              | V | V | V | V | 4 |
| SENP6    | SUMO1/sentrin specific peptidase 6                                                     | V | V | V | V | 4 |
| COL11A1  | collagen, type XI, alpha 1                                                             | V | V | V | V | 4 |
| XPO7     | exportin 7                                                                             | V | V | V | V | 4 |
| SEMA3C   | sema domain, immunoglobulin domain (Ig), short basic domain, secreted, (semaphorin) 3C | V | V | V | V | 4 |
| SEC24A   | SEC24 family member A                                                                  | V | V | V | V | 4 |
| SATB1    | SATB homeobox 1                                                                        | V | V | V | V | 4 |
| CPNE4    | copine IV                                                                              | V | V | V | V | 4 |
| RYBP     | RING1 and YY1 binding protein                                                          | V | V | V | V | 4 |
| CRISPLD1 | cysteine-rich secretory protein LCCL domain containing 1                               | V | V | V | V | 4 |
| CRK      | v-crk avian sarcoma virus CT10 oncogene homolog                                        | V | V | V | V | 4 |
| RPS6KA3  | ribosomal protein S6 kinase, 90kDa, polypeptide 3                                      | V | V | V | V | 4 |
| RPRD1A   | regulation of nuclear pre-mRNA domain containing 1A                                    | V | V | V | V | 4 |
| CTNNA2   | catenin (cadherin-associated protein), alpha 2                                         | V | V | V | V | 4 |
| RPL22    | ribosomal protein L22                                                                  | V | V | V | V | 4 |
| PTBD3    | Polypyrimidine Tract Binding Protein 3                                                 | V | V | V | V | 4 |
| ROCK2    | Rho-associated, coiled-coil containing protein kinase 2                                | V | V | V | V | 4 |
| RNF2     | ring finger protein 2                                                                  | V | V | V | V | 4 |
| RNF144A  | ring finger protein 144A                                                               | V | V | V | V | 4 |
| DCUN1D3  | DCN1, defective in cullin neddylation 1, domain containing 3                           | V | V | V | V | 4 |
| RNF114   | ring finger protein 114                                                                | V | V | V | V | 4 |

|          |                                                                        |   |   |   |   |   |
|----------|------------------------------------------------------------------------|---|---|---|---|---|
| RNF111   | ring finger protein 111                                                | V | V | V | V | 4 |
| RC3H1    | ring finger and CCCH-type domains 1                                    | V | V | V | V | 4 |
| RBPJ     | recombination signal binding protein for immunoglobulin kappa J region | V | V | V | V | 4 |
| DDX6     | DEAD (Asp-Glu-Ala-Asp) box helicase 6                                  | V |   | V | V | 4 |
| SCAF8    | SR-Related CTD Associated Factor 8                                     | V | V | V | V | 4 |
| DENND4C  | DENN/MADD domain containing 4C                                         | V | V | V | V | 4 |
| RAPGEFL1 | Rap guanine nucleotide exchange factor (GEF)-like 1                    | V | V | V | V | 4 |
| DLC1     | deleted in liver cancer 1                                              | V | V | V | V | 4 |
| DLGAP2   | discs, large (Drosophila) homolog-associated protein 2                 | V | V |   | V | 4 |
| DMTF1    | cyclin D binding myb-like transcription factor 1                       | V | V | V | V | 4 |
| RAPGEF6  | Rap guanine nucleotide exchange factor (GEF) 6                         | V | V | V | V | 4 |
| YTHDC1   | YTH domain containing 1                                                | V | V | V | V | 4 |
| RAP1GDS1 | RAP1, GTP-GDP dissociation stimulator 1                                | V | V | V | V | 4 |
| DPP6     | dipeptidyl-peptidase 6                                                 | V | V | V | V | 4 |
| RALGPS1  | Ral GEF with PH domain and SH3 binding motif 1                         | V | V | V | V | 4 |
| DVL2     | dishevelled segment polarity protein 2                                 | V | V | V | V | 4 |
| AFF1     | AF4/FMR2 family, member 1                                              | V | V | V | V | 4 |
| RAB6B    | RAB6B, member RAS oncogene family                                      | V | V |   | V | 4 |
| RAB39B   | RAB39B, member RAS oncogene family                                     | V | V | V | V | 4 |
| EFNB2    | ephrin-B2                                                              | V | V | V | V | 4 |
| EIF1AX   | eukaryotic translation initiation factor 1A, X-linked                  | V | V | V | V | 4 |
| YTHDF1   | YTH domain family, member 1                                            | V | V | V | V | 4 |
| RAB2A    | RAB2A, member RAS oncogene family                                      | V | V | V | V | 4 |
| EIF4G2   | eukaryotic translation initiation factor 4 gamma, 2                    | V | V | V | V | 4 |
| R3HDM2   | R3H domain containing 2                                                | V | V | V | V | 4 |
| ELOVL7   | ELOVL fatty acid elongase 7                                            | V | V | V | V | 4 |
| ZBTB5    | zinc finger and BTB domain containing 5                                | V | V | V | V | 4 |
| EN1      | engrailed homeobox 1                                                   | V | V | V | V | 4 |
| R3HDM1   | R3H domain containing 1                                                | V | V | V | V | 4 |
| ZFAND3   | zinc finger, AN1-type domain 3                                         | V | V | V | V | 4 |
| PVRL1    | poliovirus receptor-related 1 (herpesvirus entry mediator C)           | V | V | V | V | 4 |
| ACVR2B   | activin A receptor, type IIB                                           | V | V | V | V | 4 |
| PTP4A1   | protein tyrosine phosphatase type IVA, member 1                        | V | V | V | V | 4 |
| PSIP1    | PC4 and SFRS1 interacting protein 1                                    | V | V | V | V | 4 |
| PRDM12   | PR domain containing 12                                                | V | V | V | V | 4 |
| ETF1     | eukaryotic translation termination factor 1                            | V | V | V | V | 4 |
| PPP1R14C | protein phosphatase 1, regulatory (inhibitor) subunit 14C              | V | V | V | V | 4 |
| ETS1     | v-ets avian erythroblastosis virus E26 oncogene homolog 1              | V | V | V | V | 4 |
| POU4F1   | POU class 4 homeobox 1                                                 | V | V | V | V | 4 |

|          |                                                                                     |   |   |   |   |   |   |
|----------|-------------------------------------------------------------------------------------|---|---|---|---|---|---|
| PNRC1    | proline-rich nuclear receptor coactivator 1                                         | V | V | V |   | V | 4 |
| FAM107B  | family with sequence similarity 107, member B                                       | V | V | V |   | V | 4 |
| PHF2     | PHD finger protein 2                                                                | V | V | V |   | V | 4 |
| JADE2    | Jade Family PHD Finger 2                                                            | V | V | V |   | V | 4 |
| PHACTR2  | phosphatase and actin regulator 2                                                   | V | V | V |   | V | 4 |
| PDS5B    | PDS5, regulator of cohesion maintenance, homolog B (S. cerevisiae)                  | V | V | V |   | V | 4 |
| PCSK2    | proprotein convertase subtilisin/kexin type 2                                       | V | V | V |   | V | 4 |
| FAM46A   | family with sequence similarity 46, member A                                        | V | V | V |   | V | 4 |
| FBXL19   | F-box and leucine-rich repeat protein 19                                            | V | V | V |   | V | 4 |
| FBXL3    | F-box and leucine-rich repeat protein 3                                             | V | V | V | V |   | 4 |
| ZFHX3    | zinc finger homeobox 3                                                              | V | V | V |   | V | 4 |
| PARD6B   | par-6 family cell polarity regulator beta                                           | V | V | V |   | V | 4 |
| PAPOLA   | poly(A) polymerase alpha                                                            | V | V | V |   | V | 4 |
| PAN3     | PAN3 poly(A) specific ribonuclease subunit homolog (S. cerevisiae)                  | V | V | V |   | V | 4 |
| PAFAH1B1 | platelet-activating factor acetylhydrolase 1b, regulatory subunit 1 (45kDa)         | V | V | V |   | V | 4 |
| FGF7     | fibroblast growth factor 7                                                          | V | V | V |   | V | 4 |
| FGFR2    | fibroblast growth factor receptor 2                                                 | V | V | V |   | V | 4 |
| FILIP1L  | filamin A interacting protein 1-like                                                | V | V | V |   | V | 4 |
| FLRT3    | fibronectin leucine rich transmembrane protein 3                                    | V | V | V |   | V | 4 |
| OSBPL3   | oxysterol binding protein-like 3                                                    | V | V | V |   | V | 4 |
| OSBP     | oxysterol binding protein                                                           | V | V | V |   | V | 4 |
| NRXN1    | neurexin 1                                                                          | V | V | V |   | V | 4 |
| ZFPM2    | zinc finger protein, FOG family member 2                                            | V | V | V |   | V | 4 |
| NRF1     | nuclear respiratory factor 1                                                        | V | V | V |   | V | 4 |
| GABRB3   | gamma-aminobutyric acid (GABA) A receptor, beta 3                                   | V | V | V |   | V | 4 |
| GAD1     | glutamate decarboxylase 1 (brain, 67kDa)                                            | V | V | V |   | V | 4 |
| ACTG1    | actin, gamma 1                                                                      | V | V | V |   | V | 4 |
| NR3C1    | nuclear receptor subfamily 3, group C, member 1 (glucocorticoid receptor)           | V | V | V |   | V | 4 |
| NLK      | nemo-like kinase                                                                    | V | V | V |   | V | 4 |
| GAS2     | growth arrest-specific 2                                                            | V | V | V |   | V | 4 |
| GBAS     | glioblastoma amplified sequence                                                     | V | V | V | V |   | 4 |
| NHS      | Nance-Horan syndrome (congenital cataracts and dental anomalies)                    | V | V | V |   | V | 4 |
| GFRA1    | GDNF family receptor alpha 1                                                        | V | V | V |   | V | 4 |
| NFKBIA   | nuclear factor of kappa light polypeptide gene enhancer in B-cells inhibitor, alpha | V | V | V |   | V | 4 |
| GNB4     | guanine nucleotide binding protein (G protein), beta polypeptide 4                  | V |   | V | V | V | 4 |
| GOLGA1   | golgin A1                                                                           | V | V | V |   | V | 4 |
| NFIA     | nuclear factor I/A                                                                  | V | V | V |   | V | 4 |
| NFAT5    | nuclear factor of activated T-cells 5, tonicity-responsive                          | V | V |   | V | V | 4 |
| NEUROD1  | neuronal differentiation 1                                                          | V | V | V |   | V | 4 |

|         |                                                                           |   |   |   |   |   |   |
|---------|---------------------------------------------------------------------------|---|---|---|---|---|---|
| GPR158  | G protein-coupled receptor 158                                            | V | V | V |   | V | 4 |
| NBEA    | neurobeachin                                                              | V | V | V |   | V | 4 |
| NAP1L5  | nucleosome assembly protein 1-like 5                                      | V | V | V |   | V | 4 |
| GRM1    | glutamate receptor, metabotropic 1                                        | V | V |   | V | V | 4 |
| GRM8    | glutamate receptor, metabotropic 8                                        | V | V | V |   | V | 4 |
| GTF2E1  | general transcription factor IIE, polypeptide 1, alpha 56kDa              | V | V |   | V | V | 4 |
| NAMPT   | nicotinamide phosphoribosyltransferase                                    | V | V | V |   | V | 4 |
| NACC2   | NACC family member 2, BEN and BTB (POZ) domain containing                 | V | V | V |   | V | 4 |
| HBP1    | HMG-box transcription factor 1                                            | V | V | V |   | V | 4 |
| KAT6B   | Lysine Acetyltransferase 6B                                               | V | V | V |   | V | 4 |
| MYH10   | myosin, heavy chain 10, non-muscle                                        | V | V | V |   | V | 4 |
| MYCN    | v-myc avian myelocytomatosis viral oncogene neuroblastoma derived homolog | V | V |   | V | V | 4 |
| HIATL1  | hippocampus abundant transcript-like 1                                    | V | V | V |   | V | 4 |
| ACSL3   | acyl-CoA synthetase long-chain family member 3                            | V | V | V |   | V | 4 |
| ZMYND11 | zinc finger, MYND-type containing 11                                      | V | V | V |   | V | 4 |
| MTMR12  | myotubularin related protein 12                                           | V | V | V |   | V | 4 |
| MSL2    | male-specific lethal 2 homolog (Drosophila)                               | V | V | V |   | V | 4 |
| ZNF592  | zinc finger protein 592                                                   | V | V | V |   | V | 4 |
| HNRNPR  | heterogeneous nuclear ribonucleoprotein R                                 | V | V | V |   | V | 4 |
| MMGT1   | membrane magnesium transporter 1                                          | V | V | V |   | V | 4 |
| KMT2C   | Lysine Methyltransferase 2C                                               | V | V | V |   | V | 4 |
| KMT2A   | Lysine Methyltransferase 2A                                               | V | V | V |   | V | 4 |
| MITF    | microphthalmia-associated transcription factor                            | V | V | V |   | V | 4 |
| MEIS2   | Meis homeobox 2                                                           | V | V | V |   | V | 4 |
| MEGF10  | multiple EGF-like-domains 10                                              | V | V | V |   | V | 4 |
| ID2     | inhibitor of DNA binding 2, dominant negative helix-loop-helix protein    | V | V | V |   | V | 4 |
| MED14   | mediator complex subunit 14                                               | V | V | V |   | V | 4 |
| MED13L  | mediator complex subunit 13-like                                          | V | V | V |   | V | 4 |
| MED13   | mediator complex subunit 13                                               | V | V | V |   | V | 4 |
| IL15RA  | interleukin 15 receptor, alpha                                            | V | V |   | V | V | 4 |
| ACBD5   | acyl-CoA binding domain containing 5                                      | V | V | V |   | V | 4 |
| INSIG2  | insulin induced gene 2                                                    | V | V | V | V |   | 4 |
| MARK1   | MAP/microtubule affinity-regulating kinase 1                              | V | V | V |   | V | 4 |
| IQSEC2  | IQ motif and Sec7 domain 2                                                | V | V | V |   | V | 4 |
| ITCH    | itchy E3 ubiquitin protein ligase                                         | V | V | V |   | V | 4 |
| MAGI1   | membrane associated guanylate kinase, WW and PDZ domain containing 1      | V | V | V |   | V | 4 |
| LZTS2   | leucine zipper, putative tumor suppressor 2                               | V | V | V |   | V | 4 |
| ZNF521  | zinc finger protein 521                                                   | V | V | V |   | V | 4 |
| JAG2    | jagged 2                                                                  | V | V | V |   | V | 4 |

|         |                                                                                   |   |   |   |   |   |
|---------|-----------------------------------------------------------------------------------|---|---|---|---|---|
| LRRC16B | leucine rich repeat containing 16B                                                | V | V | V | V | 4 |
| LRFN1   | leucine rich repeat and fibronectin type III domain containing 1                  | V | V | V | V | 4 |
| JPH1    | junctophilin 1                                                                    | V | V | V | V | 4 |
| JPH3    | junctophilin 3                                                                    | V | V | V | V | 4 |
| KALRN   | kalirin, RhoGEF kinase                                                            | V | V | V | V | 4 |
| LPHN1   | latrophilin 1                                                                     | V | V | V | V | 4 |
| LIN7C   | lin-7 homolog C (C. elegans)                                                      | V | V | V | V | 4 |
| LDB2    | LIM domain binding 2                                                              | V | V | V | V | 4 |
| LARP4   | La ribonucleoprotein domain family, member 4                                      | V | V | V | V | 4 |
| LARP1   | La ribonucleoprotein domain family, member 1                                      | V | V | V | V | 4 |
| KPNA6   | karyopherin alpha 6 (importin alpha 7)                                            | V | V | V | V | 4 |
| KCTD15  | potassium channel tetramerization domain containing 15                            | V | V | V | V | 4 |
| KHDRBS1 | KH domain containing, RNA binding, signal transduction associated 1               | V | V | V | V | 4 |
| KPNA3   | karyopherin alpha 3 (importin alpha 4)                                            | V | V | V | V | 4 |
| ICE1    | Interactor Of Little Elongation Complex ELL Subunit 1                             | V | V | V | V | 4 |
| KANSL1  | KAT8 Regulatory NSL Complex Subunit 1                                             | V | V | V | V | 4 |
| USF3    | Upstream Transcription Factor Family Member 3                                     | V | V | V | V | 4 |
| NEXMIF  | Neurite Extension And Migration Factor                                            | V | V | V | V | 4 |
| KIF11   | kinesin family member 11                                                          | V |   | V | V | 4 |
| RAPGEF5 | Rap guanine nucleotide exchange factor (GEF) 5                                    | V | V | V | V | 4 |
| KLF4    | Kruppel-like factor 4 (gut)                                                       | V | V | V | V | 4 |
| ZNF706  | zinc finger protein 706                                                           | V | V | V | V | 4 |
| KIN     | KIN, antigenic determinant of recA protein homolog (mouse)                        | V | V |   | V | 3 |
| KLF3    | Kruppel-like factor 3 (basic)                                                     | V |   | V | V | 3 |
| KIF3B   | kinesin family member 3B                                                          | V | V | V |   | 3 |
| ATG14   | Autophagy Related 14                                                              | V | V | V |   | 3 |
| KCTD12  | potassium channel tetramerization domain containing 12                            | V | V |   | V | 3 |
| KPNB1   | karyopherin (importin) beta 1                                                     | V | V | V |   | 3 |
| LANCL3  | LanC lantibiotic synthetase component C-like 3 (bacterial)                        | V |   | V | V | 3 |
| KCNMB2  | potassium large conductance calcium-activated channel, subfamily M, beta member 2 | V | V | V |   | 3 |
| KCNH5   | potassium voltage-gated channel, subfamily H (eag-related), member 5              | V | V | V |   | 3 |
| LCOR    | ligand dependent nuclear receptor corepressor                                     | V | V | V |   | 3 |
| KCNE3   | potassium voltage-gated channel, Isk-related family, member 3                     | V | V |   | V | 3 |
| LEAP2   | liver expressed antimicrobial peptide 2                                           | V | V | V |   | 3 |
| LEF1    | lymphoid enhancer-binding factor 1                                                | V | V | V |   | 3 |
| LHX8    | LIM homeobox 8                                                                    | V | V | V |   | 3 |
| LIN28A  | Lin-28 Homolog A                                                                  | V | V |   | V | 3 |
| KCND2   | potassium voltage-gated channel, Shal-related subfamily, member 2                 | V | V | V |   | 3 |
| LMO3    | LIM domain only 3 (rhombotin-like 2)                                              | V | V |   | V | 3 |

|        |                                                                                                |   |   |   |   |   |   |
|--------|------------------------------------------------------------------------------------------------|---|---|---|---|---|---|
| LMO4   | LIM domain only 4                                                                              | V | V |   |   | V | 3 |
| KCNA4  | potassium voltage-gated channel, shaker-related subfamily, member 4                            | V | V | V |   |   | 3 |
| LRCH1  | leucine-rich repeats and calponin homology (CH) domain containing 1                            | V | V |   | V |   | 3 |
| JHDM1D | jumonji C domain containing histone demethylase 1 homolog D (S. cerevisiae)                    | V | V |   |   | V | 3 |
| LRP6   | low density lipoprotein receptor-related protein 6                                             | V |   | V |   | V | 3 |
| JAK2   | Janus kinase 2                                                                                 | V | V | V |   |   | 3 |
| LRRC17 | leucine rich repeat containing 17                                                              | V | V | V |   |   | 3 |
| JAG1   | jagged 1                                                                                       | V | V |   |   | V | 3 |
| ITGB8  | integrin, beta 8                                                                               | V | V | V |   |   | 3 |
| ITGAV  | integrin, alpha V                                                                              | V | V |   | V |   | 3 |
| MAP3K7 | Mitogen-Activated Protein Kinase Kinase Kinase 7                                               | V | V |   | V |   | 3 |
| MAP4   | microtubule-associated protein 4                                                               | V | V | V |   |   | 3 |
| INTS6  | integrator complex subunit 6                                                                   | V | V |   |   | V | 3 |
| INSIG1 | insulin induced gene 1                                                                         | V | V | V |   |   | 3 |
| MBNL2  | muscleblind-like splicing regulator 2                                                          | V | V | V |   |   | 3 |
| IL13   | interleukin 13                                                                                 | V | V | V |   |   | 3 |
| IKZF2  | IKAROS family zinc finger 2 (Helios)                                                           | V | V | V |   |   | 3 |
| IGF1R  | insulin-like growth factor 1 receptor                                                          | V | V |   |   | V | 3 |
| ID1    | inhibitor of DNA binding 1, dominant negative helix-loop-helix protein                         | V | V |   |   | V | 3 |
| MEGF9  | multiple EGF-like-domains 9                                                                    | V | V | V |   |   | 3 |
| HSPA13 | heat shock protein 70kDa family, member 13                                                     | V | V |   |   | V | 3 |
| MET    | met proto-oncogene                                                                             | V | V | V |   |   | 3 |
| MID1   | midline 1 (Opitz/BBB syndrome)                                                                 | V | V | V |   |   | 3 |
| MIER3  | mesoderm induction early response 1, family member 3                                           | V | V | V |   |   | 3 |
| HS6ST2 | heparan sulfate 6-O-sulfotransferase 2                                                         | V | V |   |   | V | 3 |
| HS2ST1 | heparan sulfate 2-O-sulfotransferase 1                                                         | V | V | V |   |   | 3 |
| HOXA9  | homeobox A9                                                                                    | V |   | V |   | V | 3 |
| MLLT3  | myeloid/lymphoid or mixed-lineage leukemia (trithorax homolog, Drosophila); translocated to, 3 | V | V | V |   |   | 3 |
| HOOK3  | hook microtubule-tethering protein 3                                                           | V | V |   |   | V | 3 |
| MNT    | MNT, MAX dimerization protein                                                                  | V | V | V |   |   | 3 |
| MOB1B  | MOB Kinase Activator 1B                                                                        | V | V | V |   |   | 3 |
| HNRNPD | heterogeneous nuclear ribonucleoprotein D (AU-rich element RNA binding protein 1, 37kDa)       | V | V |   |   | V | 3 |
| MSL1   | male-specific lethal 1 homolog (Drosophila)                                                    | V | V | V |   |   | 3 |
| HMGB1  | high mobility group box 1                                                                      | V | V |   |   | V | 3 |
| MTF1   | metal-regulatory transcription factor 1                                                        | V | V |   |   | V | 3 |
| MTFMT  | mitochondrial methionyl-tRNA formyltransferase                                                 | V | V | V |   |   | 3 |
| HMBOX1 | homeobox containing 1                                                                          | V | V | V |   |   | 3 |
| MTSS1  | metastasis suppressor 1                                                                        | V | V | V |   |   | 3 |
| MXD1   | MAX dimerization protein 1                                                                     | V | V | V |   |   | 3 |

|         |                                                                                                |   |   |   |  |   |   |
|---------|------------------------------------------------------------------------------------------------|---|---|---|--|---|---|
| HECTD2  | HECT domain containing E3 ubiquitin protein ligase 2                                           | V | V | V |  |   | 3 |
| HCN1    | hyperpolarization activated cyclic nucleotide-gated potassium channel 1                        | V | V | V |  |   | 3 |
| MYH9    | myosin, heavy chain 9, non-muscle                                                              | V | V |   |  | V | 3 |
| HCCS    | holocytochrome c synthase                                                                      | V | V | V |  |   | 3 |
| HBEGF   | heparin-binding EGF-like growth factor                                                         | V | V | V |  |   | 3 |
| GTF2H1  | general transcription factor IIH, polypeptide 1, 62kDa                                         | V | V | V |  |   | 3 |
| NAP1L2  | nucleosome assembly protein 1-like 2                                                           | V | V | V |  |   | 3 |
| GRHL1   | grainyhead-like 1 (Drosophila)                                                                 | V | V |   |  | V | 3 |
| NASP    | nuclear autoantigenic sperm protein (histone-binding)                                          | V | V |   |  | V | 3 |
| GPR64   | G protein-coupled receptor 64                                                                  | V | V | V |  |   | 3 |
| NCAM1   | neural cell adhesion molecule 1                                                                | V | V |   |  | V | 3 |
| NCKAP1  | NCK-associated protein 1                                                                       | V | V | V |  |   | 3 |
| NCOA6   | nuclear receptor coactivator 6                                                                 | V | V | V |  |   | 3 |
| NDUFAB1 | NADH dehydrogenase (ubiquinone) 1, alpha/beta subcomplex, 1, 8kDa                              | V |   | V |  | V | 3 |
| GPR125  | G protein-coupled receptor 125                                                                 | V | V | V |  |   | 3 |
| NEUROG2 | neurogenin 2                                                                                   | V | V |   |  | V | 3 |
| NFASC   | neurofascin                                                                                    | V | V |   |  | V | 3 |
| GPC1    | glypican 1                                                                                     | V |   | V |  | V | 3 |
| GORASP2 | golgi reassembly stacking protein 2, 55kDa                                                     | V | V | V |  |   | 3 |
| NFIB    | nuclear factor I/B                                                                             | V | V | V |  |   | 3 |
| GNAI1   | guanine nucleotide binding protein (G protein), alpha inhibiting activity polypeptide 1        | V | V | V |  |   | 3 |
| NHLH2   | nescient helix loop helix 2                                                                    | V | V | V |  |   | 3 |
| GEM     | GTP binding protein overexpressed in skeletal muscle                                           | V | V |   |  | V | 3 |
| NIPBL   | Nipped-B homolog (Drosophila)                                                                  | V | V |   |  | V | 3 |
| NKRF    | NFKB repressing factor                                                                         | V | V | V |  |   | 3 |
| GAPVD1  | GTPase activating protein and VPS9 domains 1                                                   | V | V |   |  | V | 3 |
| NLN     | neurolysin (metallopeptidase M3 family)                                                        | V | V | V |  |   | 3 |
| NOC3L   | nucleolar complex associated 3 homolog (S. cerevisiae)                                         | V | V |   |  | V | 3 |
| GALNT7  | UDP-N-acetyl-alpha-D-galactosamine:polypeptide N-acetylgalactosaminyltransferase 7 (GalNAc-T7) | V | V |   |  | V | 3 |
| GALC    | galactosylceramidase                                                                           | V | V |   |  | V | 3 |
| FUBP3   | far upstream element (FUSE) binding protein 3                                                  | V | V | V |  |   | 3 |
| FRYL    | FRY-like                                                                                       | V | V | V |  |   | 3 |
| FRS2    | fibroblast growth factor receptor substrate 2                                                  | V | V |   |  | V | 3 |
| NTN4    | netrin 4                                                                                       | V | V | V |  |   | 3 |
| NUP153  | nucleoporin 153kDa                                                                             | V | V |   |  | V | 3 |
| ONECUT2 | one cut homeobox 2                                                                             | V | V | V |  |   | 3 |
| ORC2    | Origin Recognition Complex Subunit 2                                                           | V | V |   |  | V | 3 |
| FOXP2   | forkhead box P2                                                                                | V |   | V |  | V | 3 |
| FOXF2   | forkhead box F2                                                                                | V | V | V |  |   | 3 |

|          |                                                                                                           |   |   |   |   |   |   |
|----------|-----------------------------------------------------------------------------------------------------------|---|---|---|---|---|---|
| OTUD4    | OTU domain containing 4                                                                                   | V | V |   |   | V | 3 |
| OTUD6B   | OTU domain containing 6B                                                                                  | V | V | V |   |   | 3 |
| OTUD7B   | OTU domain containing 7B                                                                                  | V | V | V |   |   | 3 |
| FGF1     | fibroblast growth factor 1 (acidic)                                                                       | V | V |   |   | V | 3 |
| FCHO2    | FCH domain only 2                                                                                         | V | V | V |   |   | 3 |
| FBXO45   | F-box protein 45                                                                                          | V |   | V |   | V | 3 |
| PAPOLG   | poly(A) polymerase gamma                                                                                  | V | V | V |   |   | 3 |
| FBXO34   | F-box protein 34                                                                                          | V | V | V |   |   | 3 |
| PARVA    | parvin, alpha                                                                                             | V | V |   | V |   | 3 |
| PCDH11X  | protocadherin 11 X-linked                                                                                 | V | V | V |   |   | 3 |
| PCDH11Y  | protocadherin 11 Y-linked                                                                                 | V | V | V |   |   | 3 |
| PCDH17   | protocadherin 17                                                                                          | V | V | V |   |   | 3 |
| PCDH8    | protocadherin 8                                                                                           | V | V | V |   |   | 3 |
| FBXO21   | F-box protein 21                                                                                          | V | V | V |   |   | 3 |
| PCLO     | piccolo presynaptic cytomatrix protein                                                                    | V | V |   |   | V | 3 |
| FAM178A  | family with sequence similarity 178, member A                                                             | V | V |   | V |   | 3 |
| PDE7B    | phosphodiesterase 7B                                                                                      | V | V | V |   |   | 3 |
| PDGFC    | platelet derived growth factor C                                                                          | V | V | V |   |   | 3 |
| PDIK1L   | PDLIM1 interacting kinase 1 like                                                                          | V | V | V |   |   | 3 |
| PDS5A    | PDS5, regulator of cohesion maintenance, homolog A (S. cerevisiae)                                        | V | V | V |   |   | 3 |
| FAM175A  | family with sequence similarity 175, member A                                                             | V | V | V |   |   | 3 |
| PELI1    | pellino E3 ubiquitin protein ligase 1                                                                     | V | V | V |   |   | 3 |
| PGAP1    | post-GPI attachment to proteins 1                                                                         | V | V |   | V |   | 3 |
| FAM160B1 | family with sequence similarity 160, member B1                                                            | V | V | V |   |   | 3 |
| FAM135B  | family with sequence similarity 135, member B                                                             | V | V | V |   |   | 3 |
| FAM117A  | family with sequence similarity 117, member A                                                             | V | V |   |   | V | 3 |
| PHTF2    | putative homeodomain transcription factor 2                                                               | V | V | V |   |   | 3 |
| PI15     | peptidase inhibitor 15                                                                                    | V | V |   |   | V | 3 |
| PLAG1    | pleiomorphic adenoma gene 1                                                                               | V | V |   |   | V | 3 |
| PLCXD3   | phosphatidylinositol-specific phospholipase C, X domain containing 3                                      | V | V | V |   |   | 3 |
| PMP22    | peripheral myelin protein 22                                                                              | V | V | V |   |   | 3 |
| PMPCB    | peptidase (mitochondrial processing) beta                                                                 | V | V | V |   |   | 3 |
| EXO1     | exonuclease 1                                                                                             | V | V |   |   | V | 3 |
| POPDC3   | popeye domain containing 3                                                                                | V | V | V |   |   | 3 |
| ETS2     | v-ets avian erythroblastosis virus E26 oncogene homolog 2                                                 | V |   |   | V | V | 3 |
| PPAP2B   | phosphatidic acid phosphatase type 2B                                                                     | V | V | V |   |   | 3 |
| PPFIA1   | protein tyrosine phosphatase, receptor type, f polypeptide (PTPRF), interacting protein (liprin), alpha 1 | V |   | V |   | V | 3 |
| PPM1D    | protein phosphatase, Mg2+/Mn2+ dependent, 1D                                                              | V | V | V |   |   | 3 |
| PPM1E    | protein phosphatase, Mg2+/Mn2+ dependent, 1E                                                              | V | V | V |   |   | 3 |

|           |                                                                     |   |   |   |   |   |   |
|-----------|---------------------------------------------------------------------|---|---|---|---|---|---|
| ETNK1     | ethanolamine kinase 1                                               | V | V | V |   |   | 3 |
| PPP2R2C   | protein phosphatase 2, regulatory subunit B, gamma                  | V | V |   |   | V | 3 |
| PPP6C     | protein phosphatase 6, catalytic subunit                            | V | V | V |   |   | 3 |
| ESR1      | estrogen receptor 1                                                 | V |   | V |   | V | 3 |
| PRDM16    | PR domain containing 16                                             | V | V | V |   |   | 3 |
| PRKACB    | protein kinase, cAMP-dependent, catalytic, beta                     | V | V | V |   |   | 3 |
| PRKCE     | protein kinase C, epsilon                                           | V |   |   | V | V | 3 |
| PRPF38B   | pre-mRNA processing factor 38B                                      | V | V | V |   |   | 3 |
| PRPF8     | pre-mRNA processing factor 8                                        | V |   |   | V | V | 3 |
| PRPS2     | phosphoribosyl pyrophosphate synthetase 2                           | V | V | V |   |   | 3 |
| PRRX1     | paired related homeobox 1                                           | V | V | V |   |   | 3 |
| ESM1      | endothelial cell-specific molecule 1                                | V | V | V |   |   | 3 |
| PSMD3     | proteasome (prosome, macropain) 26S subunit, non-ATPase, 3          | V | V | V |   |   | 3 |
| PTBP1     | polypyrimidine tract binding protein 1                              | V | V | V |   |   | 3 |
| PTCH1     | patched 1                                                           | V |   | V |   | V | 3 |
| PTGFR     | prostaglandin F receptor (FP)                                       | V | V |   |   | V | 3 |
| PTK2      | protein tyrosine kinase 2                                           | V | V | V |   |   | 3 |
| ERO1L     | ERO1-like (S. cerevisiae)                                           | V | V | V |   |   | 3 |
| PURA      | purine-rich element binding protein A                               | V | V | V |   |   | 3 |
| PURG      | purine-rich element binding protein G                               | V | V | V |   |   | 3 |
| EPB41L5   | erythrocyte membrane protein band 4.1 like 5                        | V | V | V |   |   | 3 |
| QKI       | QKI, KH domain containing, RNA binding                              | V | V | V |   |   | 3 |
| EPB41     | erythrocyte membrane protein band 4.1 (elliptocytosis 1, RH-linked) | V |   | V |   | V | 3 |
| EIF4G3    | eukaryotic translation initiation factor 4 gamma, 3                 | V | V | V |   |   | 3 |
| RAB11FIP2 | RAB11 family interacting protein 2 (class I)                        | V | V | V |   |   | 3 |
| RAB1B     | RAB1B, member RAS oncogene family                                   | V | V | V |   |   | 3 |
| RAB27A    | RAB27A, member RAS oncogene family                                  | V | V | V |   |   | 3 |
| EIF3A     | eukaryotic translation initiation factor 3, subunit A               | V | V | V |   |   | 3 |
| EBF3      | early B-cell factor 3                                               | V |   |   | V | V | 3 |
| DYRK1A    | dual-specificity tyrosine-(Y)-phosphorylation regulated kinase 1A   | V | V | V |   |   | 3 |
| DYNC1LI2  | dynein, cytoplasmic 1, light intermediate chain 2                   | V | V | V |   |   | 3 |
| DUSP3     | dual specificity phosphatase 3                                      | V | V |   | V |   | 3 |
| DOCK4     | dedicator of cytokinesis 4                                          | V | V | V |   |   | 3 |
| RAP2C     | RAP2C, member of RAS oncogene family                                | V |   | V |   | V | 3 |
| DNM3      | dynammin 3                                                          | V | V |   | V |   | 3 |
| DNAJB2    | DnaJ (Hsp40) homolog, subfamily B, member 2                         | V | V | V |   |   | 3 |
| DGKD      | diacylglycerol kinase, delta 130kDa                                 | V | V | V |   |   | 3 |
| DEK       | DEK oncogene                                                        | V | V |   |   | V | 3 |
| RBM24     | RNA binding motif protein 24                                        | V | V | V |   |   | 3 |

|         |                                                                    |   |   |   |   |   |   |   |
|---------|--------------------------------------------------------------------|---|---|---|---|---|---|---|
| RBM26   | RNA binding motif protein 26                                       | V | V |   | V |   |   | 3 |
| RBM7    | RNA binding motif protein 7                                        | V | V |   |   | V |   | 3 |
| DDX52   | DEAD (Asp-Glu-Ala-Asp) box polypeptide 52                          | V | V |   |   | V |   | 3 |
| RBPMS2  | RNA binding protein with multiple splicing 2                       | V |   |   | V | V |   | 3 |
| DDX4    | DEAD (Asp-Glu-Ala-Asp) box polypeptide 4                           | V | V |   |   | V |   | 3 |
| RCAN2   | regulator of calcineurin 2                                         | V | V |   |   |   | V | 3 |
| REV3L   | REV3-like, polymerase (DNA directed), zeta, catalytic subunit      | V | V |   |   |   | V | 3 |
| RICTOR  | RPTOR independent companion of MTOR, complex 2                     | V | V |   |   |   | V | 3 |
| RIT1    | Ras-like without CAAX 1                                            | V | V |   | V |   |   | 3 |
| DDIT3   | DNA-damage-inducible transcript 3                                  | V | V |   | V |   |   | 3 |
| DCX     | doublecortin                                                       | V | V |   | V |   |   | 3 |
| RNF13   | ring finger protein 13                                             | V | V |   | V |   |   | 3 |
| DCBLD2  | discoidin, CUB and LCCL domain containing 2                        | V | V |   |   |   | V | 3 |
| RNF19A  | ring finger protein 19A, RBR E3 ubiquitin protein ligase           | V |   |   |   | V | V | 3 |
| DAG1    | dystroglycan 1 (dystrophin-associated glycoprotein 1)              | V | V |   | V |   |   | 3 |
| RNF38   | ring finger protein 38                                             | V | V | V |   |   |   | 3 |
| CYB5B   | cytochrome b5 type B (outer mitochondrial membrane)                | V | V |   | V |   |   | 3 |
| CWC22   | CWC22 spliceosome-associated protein homolog (S. cerevisiae)       | V | V |   | V |   |   | 3 |
| CUL3    | cullin 3                                                           | V |   |   |   | V | V | 3 |
| CTCF    | CCCTC-binding factor (zinc finger protein)                         | V | V |   | V |   |   | 3 |
| RPRD1B  | regulation of nuclear pre-mRNA domain containing 1B                | V | V |   |   |   | V | 3 |
| CSNK1G3 | casein kinase 1, gamma 3                                           | V | V |   | V |   |   | 3 |
| RPS6KB1 | ribosomal protein S6 kinase, 70kDa, polypeptide 1                  | V | V |   | V |   |   | 3 |
| RRN3    | RRN3 RNA polymerase I transcription factor homolog (S. cerevisiae) | V | V |   |   |   | V | 3 |
| CREB5   | cAMP responsive element binding protein 5                          | V | V |   | V |   |   | 3 |
| SALL1   | spalt-like transcription factor 1                                  | V | V |   | V |   |   | 3 |
| CPEB4   | cytoplasmic polyadenylation element binding protein 4              | V | V |   |   |   | V | 3 |
| SBF2    | SET binding factor 2                                               | V | V |   |   |   | V | 3 |
| CPEB3   | cytoplasmic polyadenylation element binding protein 3              | V | V |   |   |   | V | 3 |
| COL3A1  | collagen, type III, alpha 1                                        | V | V |   | V |   |   | 3 |
| COL19A1 | collagen, type XIX, alpha 1                                        | V | V |   |   | V |   | 3 |
| COBLL1  | cordon-bleu WH2 repeat protein-like 1                              | V | V |   |   | V |   | 3 |
| CNR1    | cannabinoid receptor 1 (brain)                                     | V | V |   | V |   |   | 3 |
| SEPT9   | septin 9                                                           | V | V |   |   |   | V | 3 |
| SFPQ    | splicing factor proline/glutamine-rich                             | V | V |   | V |   |   | 3 |
| CNOT1   | CCR4-NOT transcription complex, subunit 1                          | V |   |   | V |   | V | 3 |
| SGK3    | serum/glucocorticoid regulated kinase family, member 3             | V | V |   |   |   | V | 3 |
| CLIP3   | CAP-GLY domain containing linker protein 3                         | V | V |   | V |   |   | 3 |
| CLIP1   | CAP-GLY domain containing linker protein 1                         | V | V |   |   | V |   | 3 |

|          |                                                                                |   |   |  |   |   |   |   |
|----------|--------------------------------------------------------------------------------|---|---|--|---|---|---|---|
| CLDN1    | claudin 1                                                                      | V | V |  |   | V | 3 |   |
| CLCN5    | chloride channel, voltage-sensitive 5                                          | V | V |  | V |   | 3 |   |
| CIRBP    | cold inducible RNA binding protein                                             | V | V |  | V |   | 3 |   |
| SIX4     | SIX homeobox 4                                                                 | V | V |  | V |   | 3 |   |
| SLC12A6  | solute carrier family 12 (potassium/chloride transporter), member 6            | V | V |  | V |   | 3 |   |
| CHL1     | cell adhesion molecule L1-like                                                 | V | V |  | V |   | 3 |   |
| SLC16A9  | solute carrier family 16, member 9                                             | V | V |  | V |   | 3 |   |
| CGGBP1   | CGG triplet repeat binding protein 1                                           | V | V |  | V |   | 3 |   |
| CEP76    | centrosomal protein 76kDa                                                      | V |   |  | V | V | 3 |   |
| SLC25A24 | solute carrier family 25 (mitochondrial carrier; phosphate carrier), member 24 | V | V |  | V |   | 3 |   |
| SLC38A2  | solute carrier family 38, member 2                                             | V |   |  | V | V | 3 |   |
| CDC37L1  | cell division cycle 37-like 1                                                  | V | V |  | V |   | 3 |   |
| CD2AP    | CD2-associated protein                                                         | V | V |  | V |   | 3 |   |
| SLTM     | SAFB-like, transcription modulator                                             | V | V |  | V |   | 3 |   |
| CCNT2    | cyclin T2                                                                      | V | V |  | V |   | 3 |   |
| SNCA     | synuclein, alpha (non A4 component of amyloid precursor)                       | V | V |  |   | V | 3 |   |
| CCDC85A  | coiled-coil domain containing 85A                                              | V | V |  | V |   | 3 |   |
| CCDC47   | coiled-coil domain containing 47                                               | V | V |  | V |   | 3 |   |
| CAND1    | cullin-associated and neddylation-dissociated 1                                | V | V |  | V |   | 3 |   |
| CAMLG    | calcium modulating ligand                                                      | V | V |  |   | V | 3 |   |
| CADPS2   | Ca++-dependent secretion activator 2                                           | V |   |  |   | V | V | 3 |
| SOX11    | SRY (sex determining region Y)-box 11                                          | V |   |  |   | V | V | 3 |
| CAAP1    | Caspase Activity And Apoptosis Inhibitor 1                                     | V | V |  | V |   |   | 3 |
| KIAA1456 | KIAA1456                                                                       | V | V |  | V |   |   | 3 |
| SOX9     | SRY (sex determining region Y)-box 9                                           | V | V |  |   |   | V | 3 |
| CREBRF   | CREB3 Regulatory Factor                                                        | V |   |  |   | V | V | 3 |
| SP4      | Sp4 transcription factor                                                       | V | V |  | V |   |   | 3 |
| SPOCK1   | sparc/osteonectin, cwcv and kazal-like domains proteoglycan (testican) 1       | V | V |  |   | V |   | 3 |
| SPRY1    | sprouty homolog 1, antagonist of FGF signaling (Drosophila)                    | V |   |  |   | V | V | 3 |
| SPRY3    | sprouty homolog 3 (Drosophila)                                                 | V | V |  |   |   | V | 3 |
| C15ORF41 | chromosome 15 open reading frame 41                                            | V | V |  | V |   |   | 3 |
| C10ORF12 | chromosome 10 open reading frame 12                                            | V | V |  | V |   |   | 3 |
| SRRM1    | serine/arginine repetitive matrix 1                                            | V | V |  | V |   |   | 3 |
| SS18     | synovial sarcoma translocation, chromosome 18                                  | V |   |  |   | V | V | 3 |
| BTG1     | B-cell translocation gene 1, anti-proliferative                                | V | V |  | V |   |   | 3 |
| ST18     | suppression of tumorigenicity 18 (breast carcinoma) (zinc finger protein)      | V | V |  |   |   | V | 3 |
| BST1     | bone marrow stromal cell antigen 1                                             | V | V |  |   | V |   | 3 |
| ST8SIA3  | ST8 alpha-N-acetyl-neuraminide alpha-2,8-sialyltransferase 3                   | V | V |  | V |   |   | 3 |
| STAG1    | stromal antigen 1                                                              | V | V |  | V |   |   | 3 |

|          |                                                                                   |   |   |  |   |   |   |   |
|----------|-----------------------------------------------------------------------------------|---|---|--|---|---|---|---|
| STK24    | serine/threonine kinase 24                                                        | V | V |  |   |   | V | 3 |
| BRWD1    | bromodomain and WD repeat domain containing 1                                     | V | V |  |   | V |   | 3 |
| BRD7     | bromodomain containing 7                                                          | V | V |  |   | V |   | 3 |
| STX16    | syntaxin 16                                                                       | V | V |  |   | V |   | 3 |
| STXBP5   | syntaxin binding protein 5 (tomosyn)                                              | V | V |  |   | V |   | 3 |
| BMPR2    | bone morphogenetic protein receptor, type II (serine/threonine kinase)            | V | V |  |   |   | V | 3 |
| BHLHE22  | Basic Helix-Loop-Helix Family Member E22                                          | V | V |  |   | V |   | 3 |
| SYT14    | synaptotagmin XIV                                                                 | V | V |  |   | V |   | 3 |
| SYT14L   | synaptotagmin XIV-like                                                            | V | V |  |   | V |   | 3 |
| SYVN1    | synovial apoptosis inhibitor 1, synoviolin                                        | V | V |  |   |   | V | 3 |
| TAF4B    | TAF4b RNA polymerase II, TATA box binding protein (TBP)-associated factor, 105kDa | V | V |  |   |   | V | 3 |
| BDNF     | brain-derived neurotrophic factor                                                 | V |   |  | V |   | V | 3 |
| TBC1D15  | TBC1 domain family, member 15                                                     | V | V |  |   | V |   | 3 |
| TBC1D4   | TBC1 domain family, member 4                                                      | V | V |  |   | V |   | 3 |
| PRRC2A   | Proline Rich Coiled-Coil 2A                                                       | V | V |  |   |   | V | 3 |
| TEK      | TEK tyrosine kinase, endothelial                                                  | V | V |  |   |   | V | 3 |
| TET2     | tet methylcytosine dioxygenase 2                                                  | V |   |  |   |   | V | 3 |
| BAIAP2   | BAI1-associated protein 2                                                         | V | V |  |   | V |   | 3 |
| THSD7B   | thrombospondin, type I, domain containing 7B                                      | V | V |  |   | V |   | 3 |
| THUMPD1  | THUMP domain containing 1                                                         | V | V |  |   | V |   | 3 |
| TIMM8A   | translocase of inner mitochondrial membrane 8 homolog A (yeast)                   | V | V |  |   | V |   | 3 |
| TLN2     | talin 2                                                                           | V | V |  |   |   | V | 3 |
| TM4SF1   | transmembrane 4 L six family member 1                                             | V | V |  |   | V |   | 3 |
| TMED7    | transmembrane emp24 protein transport domain containing 7                         | V | V |  |   |   | V | 3 |
| TMEM14C  | transmembrane protein 14C                                                         | V | V |  |   |   | V | 3 |
| TMEM161B | transmembrane protein 161B                                                        | V | V |  |   | V |   | 3 |
| B4GALT6  | UDP-Gal:betaGlcNAc beta 1,4- galactosyltransferase, polypeptide 6                 | V | V |  |   |   | V | 3 |
| TMEM185A | transmembrane protein 185A                                                        | V | V |  |   | V |   | 3 |
| TNFRSF21 | tumor necrosis factor receptor superfamily, member 21                             | V | V |  |   | V |   | 3 |
| TNFSF4   | tumor necrosis factor (ligand) superfamily, member 4                              | V | V |  |   |   | V | 3 |
| B3GNT5   | UDP-GlcNAc:betaGal beta-1,3-N-acetylglucosaminyltransferase 5                     | V | V |  |   | V |   | 3 |
| ATXN7L1  | ataxin 7-like 1                                                                   | V | V |  |   |   | V | 3 |
| TRIO     | trio Rho guanine nucleotide exchange factor                                       | V | V |  |   | V |   | 3 |
| CEP41    | Centrosomal Protein 41                                                            | V | V |  |   | V |   | 3 |
| TSPAN2   | tetraspanin 2                                                                     | V | V |  |   | V |   | 3 |
| TXNDC5   | thioredoxin domain containing 5 (endoplasmic reticulum)                           | V |   |  |   | V | V | 3 |
| ATP2B4   | ATPase, Ca++ transporting, plasma membrane 4                                      | V | V |  |   | V |   | 3 |
| ATP2A2   | ATPase, Ca++ transporting, cardiac muscle, slow twitch 2                          | V | V |  |   | V |   | 3 |
| UBE2W    | ubiquitin-conjugating enzyme E2W (putative)                                       | V | V |  |   |   | V | 3 |

|          |                                                                     |   |   |   |   |   |
|----------|---------------------------------------------------------------------|---|---|---|---|---|
| ASPHD2   | aspartate beta-hydroxylase domain containing 2                      | V |   | V | V | 3 |
| ART3     | ADP-ribosyltransferase 3                                            | V | V | V |   | 3 |
| UBL3     | ubiquitin-like 3                                                    | V | V |   | V | 3 |
| UBLCP1   | ubiquitin-like domain containing CTD phosphatase 1                  | V | V | V |   | 3 |
| ARRDC3   | arrestin domain containing 3                                        | V | V |   | V | 3 |
| ARMC8    | armadillo repeat containing 8                                       | V | V | V |   | 3 |
| UBR3     | ubiquitin protein ligase E3 component n-recognin 3 (putative)       | V | V | V |   | 3 |
| ARID4B   | AT rich interactive domain 4B (RBP1-like)                           | V | V | V |   | 3 |
| UBXN7    | UBX domain protein 7                                                | V | V |   | V | 3 |
| ARAP2    | ArfGAP with RhoGAP domain, ankyrin repeat and PH domain 2           | V | V |   | V | 3 |
| USP1     | ubiquitin specific peptidase 1                                      | V | V | V |   | 3 |
| APPBP2   | amyloid beta precursor protein (cytoplasmic tail) binding protein 2 | V | V | V |   | 3 |
| ANKS1B   | ankyrin repeat and sterile alpha motif domain containing 1B         | V | V | V |   | 3 |
| USP6     | ubiquitin specific peptidase 6 (Tre-2 oncogene)                     | V | V |   | V | 3 |
| UVRAG    | UV radiation resistance associated                                  | V | V | V |   | 3 |
| VAMP1    | vesicle-associated membrane protein 1 (synaptobrevin 1)             | V | V | V |   | 3 |
| ANKRD50  | ankyrin repeat domain 50                                            | V |   | V | V | 3 |
| VBP1     | von Hippel-Lindau binding protein 1                                 | V | V | V |   | 3 |
| ANKRD13A | ankyrin repeat domain 13A                                           | V | V | V |   | 3 |
| VEGFA    | vascular endothelial growth factor A                                | V | V | V |   | 3 |
| VEZF1    | vascular endothelial zinc finger 1                                  | V | V | V |   | 3 |
| VNN2     | vanin 2                                                             | V | V |   | V | 3 |
| ANKHD1   | ankyrin repeat and KH domain containing 1                           | V | V | V |   | 3 |
| VSNL1    | visinin-like 1                                                      | V | V | V |   | 3 |
| ANK3     | ankyrin 3, node of Ranvier (ankyrin G)                              | V |   | V | V | 3 |
| WDR26    | WD repeat domain 26                                                 | V | V |   | V | 3 |
| AMOT     | angiomotin                                                          | V | V |   | V | 3 |
| WDR7     | WD repeat domain 7                                                  | V | V | V |   | 3 |
| AKAP6    | A kinase (PRKA) anchor protein 6                                    | V | V |   | V | 3 |
| WIPI1    | WD repeat domain, phosphoinositide interacting 1                    | V | V | V |   | 3 |
| AGPAT3   | 1-acylglycerol-3-phosphate O-acyltransferase 3                      | V | V |   | V | 3 |
| XIAP     | X-linked inhibitor of apoptosis                                     | V | V | V |   | 3 |
| AFF4     | AF4/FMR2 family, member 4                                           | V | V |   | V | 3 |
| AFF3     | AF4/FMR2 family, member 3                                           | V | V |   | V | 3 |
| AFF2     | AF4/FMR2 family, member 2                                           | V | V |   | V | 3 |
| ADNP     | activity-dependent neuroprotector homeobox                          | V | V | V |   | 3 |
| YY1      | YY1 transcription factor                                            | V | V |   | V | 3 |
| ZAK      | sterile alpha motif and leucine zipper containing kinase AZK        | V | V | V |   | 3 |
| ZBTB22   | zinc finger and BTB domain containing 22                            | V | V |   | V | 3 |

|           |                                                              |   |   |   |   |   |   |
|-----------|--------------------------------------------------------------|---|---|---|---|---|---|
| ZBTB34    | zinc finger and BTB domain containing 34                     | V | V | V |   |   | 3 |
| ZBTB39    | zinc finger and BTB domain containing 39                     | V | V |   |   | V | 3 |
| ADAMTSL3  | ADAMTS-like 3                                                | V | V |   |   | V | 3 |
| ZC3H11A   | zinc finger CCCH-type containing 11A                         | V | V | V |   |   | 3 |
| ZC3H12B   | zinc finger CCCH-type containing 12B                         | V |   | V |   | V | 3 |
| ZC3H6     | zinc finger CCCH-type containing 6                           | V | V | V |   |   | 3 |
| ZC3H7A    | zinc finger CCCH-type containing 7A                          | V | V | V |   |   | 3 |
| ZCCHC11   | zinc finger, CCHC domain containing 11                       | V | V | V |   |   | 3 |
| ZDHC2     | zinc finger, DHHC-type containing 2                          | V |   | V |   | V | 3 |
| ADAMTS3   | ADAM metalloproteinase with thrombospondin type 1 motif, 3   | V | V | V |   |   | 3 |
| ACVR2A    | activin A receptor, type IIA                                 | V | V | V |   |   | 3 |
| ZFP36     | ZFP36 ring finger protein                                    | V | V | V |   |   | 3 |
| ACVR1     | activin A receptor, type I                                   | V | V |   |   | V | 3 |
| ZFY       | zinc finger protein, Y-linked                                | V | V | V |   |   | 3 |
| ZFYVE20   | zinc finger, FYVE domain containing 20                       | V |   | V |   | V | 3 |
| ZIC5      | Zic family member 5                                          | V | V | V |   |   | 3 |
| ACE2      | angiotensin I converting enzyme 2                            | V | V |   | V |   | 3 |
| ZNF292    | zinc finger protein 292                                      | V | V |   |   | V | 3 |
| ZBTB21    | Zinc Finger And BTB Domain Containing 21                     | V | V | V |   |   | 3 |
| ABCD3     | ATP-binding cassette, sub-family D (ALD), member 3           | V | V | V |   |   | 3 |
| MPHOSPH9  | M-phase phosphoprotein 9                                     | V | V | V |   |   | 3 |
| ABCA1     | ATP-binding cassette, sub-family A (ABC1), member 1          | V | V | V |   |   | 3 |
| CACNA1C   | calcium channel, voltage-dependent, L type, alpha 1C subunit |   | V | V |   | V | 3 |
| CEBPA     | CCAAT/enhancer binding protein (C/EBP), alpha                |   | V | V |   | V | 3 |
| DHX40     | DEAH (Asp-Glu-Ala-His) box polypeptide 40                    |   | V | V |   | V | 3 |
| DIO2      | deiodinase, iodothyronine, type II                           |   | V | V |   | V | 3 |
| EIF1      | eukaryotic translation initiation factor 1                   |   | V | V |   | V | 3 |
| FNIP1     | folliculin interacting protein 1                             |   | V | V |   | V | 3 |
| GABARAPL1 | GABA(A) receptor-associated protein like 1                   |   | V | V | V |   | 3 |
| ARHGAP35  | Rho GTPase Activating Protein 35                             |   | V | V |   | V | 3 |
| GTF2I     | general transcription factor Iii                             |   | V | V |   | V | 3 |
| KDM5B     | Lysine Demethylase 5B                                        |   | V | V |   | V | 3 |
| PDAP1     | PDGFA associated protein 1                                   |   | V | V |   | V | 3 |
| PHF21A    | PHD finger protein 21A                                       |   | V | V |   | V | 3 |
| PURB      | purine-rich element binding protein B                        |   | V | V |   | V | 3 |
| DCAF10    | DDB1 And CUL4 Associated Factor 10                           |   | V | V |   | V | 3 |
| DCAF12    | DDB1 And CUL4 Associated Factor 12                           |   | V | V |   | V | 3 |
| ZBTB38    | zinc finger and BTB domain containing 38                     |   | V | V |   | V | 3 |
| ZNF532    | zinc finger protein 532                                      |   | V | V |   | V | 3 |

|       |                 |   |   |   |   |
|-------|-----------------|---|---|---|---|
| PCDH7 | protocadherin 7 | V | V | V | 3 |
|-------|-----------------|---|---|---|---|
