# Supplementary material
Source: publisher figshare collection journal article supplement (https://tandf.figshare.com/articles/dataset/_/7477601)
Supplement: Supplementary file 1 [file 2 › ibmk_a_1508308_sm7120.pdf]

**Supplemental Table S4. *In silico* predicted cotargets by both mmu-miRs-206-3p and -381-3p.**

| <b>TARGET GENE</b> | <b>GENE DESCRIPTION</b>                                                 |
|--------------------|-------------------------------------------------------------------------|
| GPR125             | G protein-coupled receptor 125                                          |
| CTNNA2             | catenin (cadherin-associated protein), alpha 2                          |
| SFRP2              | secreted frizzled-related protein 2                                     |
| TM4SF1             | transmembrane 4 L six family member 1                                   |
| KLF4               | Kruppel-like factor 4 (gut)                                             |
| CAAP1              | Caspase Activity And Apoptosis Inhibitor 1                              |
| EIF1AX             | eukaryotic translation initiation factor 1A, X-linked                   |
| TBC1D15            | TBC1 domain family, member 15                                           |
| UBR5               | ubiquitin protein ligase E3 component n-recognin 5                      |
| NAP1L5             | nucleosome assembly protein 1-like 5                                    |
| PTBP1              | polypyrimidine tract binding protein 1                                  |
| WEE1               | WEE1 G2 checkpoint kinase                                               |
| BHLHE22            | Basic Helix-Loop-Helix Family Member E22                                |
| SMEK2              | SMEK homolog 2, suppressor of mek1 (Dictyostelium)                      |
| RNF19A             | ring finger protein 19A, RBR E3 ubiquitin protein ligase                |
| NEUROD1            | neuronal differentiation 1                                              |
| FAM107B            | family with sequence similarity 107, member B                           |
| NBEA               | neurobeachin                                                            |
| RCAN2              | regulator of calcineurin 2                                              |
| CRK                | v-crk avian sarcoma virus CT10 oncogene homolog                         |
| SOX9               | SRY (sex determining region Y)-box 9                                    |
| MET                | met proto-oncogene                                                      |
| MTSS1              | metastasis suppressor 1                                                 |
| SS18               | synovial sarcoma translocation, chromosome 18                           |
| HIVBP2             | human immunodeficiency virus type I enhancer binding protein 2          |
| OSBP               | oxysterol binding protein                                               |
| UBE4A              | ubiquitination factor E4A                                               |
| RNF111             | ring finger protein 111                                                 |
| CAND1              | cullin-associated and neddylation-dissociated 1                         |
| AZIN1              | antizyme inhibitor 1                                                    |
| HCN1               | hyperpolarization activated cyclic nucleotide-gated potassium channel 1 |
| MNT                | MNT, MAX dimerization protein                                           |
| CD2AP              | CD2-associated protein                                                  |
| STX12              | syntaxin 12                                                             |
| VEGFA              | vascular endothelial growth factor A                                    |
| ZMYND11            | zinc finger, MYND-type containing 11                                    |
| UBN1               | ubiquitin 1                                                             |
| FUBP3              | far upstream element (FUSE) binding protein 3                           |
| INTS6              | integrator complex subunit 6                                            |
| DLC1               | deleted in liver cancer 1                                               |
| NAMPT              | nicotinamide phosphoribosyltransferase                                  |
| SLC38A2            | solute carrier family 38, member 2                                      |
| YES1               | v-yes-1 Yamaguchi sarcoma viral oncogene homolog 1                      |
| ARRDC3             | arrestin domain containing 3                                            |

|          |                                                                                 |
|----------|---------------------------------------------------------------------------------|
| BDNF     | brain-derived neurotrophic factor                                               |
| PRKACB   | protein kinase, cAMP-dependent, catalytic, beta                                 |
| VEZF1    | vascular endothelial zinc finger 1                                              |
| CHL1     | cell adhesion molecule L1-like                                                  |
| MTMR12   | myotubularin related protein 12                                                 |
| PCDH17   | protocadherin 17                                                                |
| PRKCE    | protein kinase C, epsilon                                                       |
| PDIK1L   | PDLIM1 interacting kinase 1 like                                                |
| NR3C1    | nuclear receptor subfamily 3, group C, member 1 (glucocorticoid receptor)       |
| RPRD1A   | regulation of nuclear pre-mRNA domain containing 1A                             |
| MED14    | mediator complex subunit 14                                                     |
| PRDM16   | PR domain containing 16                                                         |
| LIN7C    | lin-7 homolog C (C. elegans)                                                    |
| EPB41L1  | erythrocyte membrane protein band 4.1-like 1                                    |
| RYBP     | RING1 and YY1 binding protein                                                   |
| LARP4    | La ribonucleoprotein domain family, member 4                                    |
| EFNB2    | ephrin-B2                                                                       |
| MXD1     | MAX dimerization protein 1                                                      |
| DNM3     | dynammin 3                                                                      |
| RICTOR   | RPTOR independent companion of MTOR, complex 2                                  |
| BCL11A   | B-cell CLL/lymphoma 11A (zinc finger protein)                                   |
| ESR1     | estrogen receptor 1                                                             |
| RNF38    | ring finger protein 38                                                          |
| VAPA     | VAMP (vesicle-associated membrane protein)-associated protein A, 33kDa          |
| ETS1     | v-ets avian erythroblastosis virus E26 oncogene homolog 1                       |
| AMOT     | angiomotin                                                                      |
| PAFAH1B1 | platelet-activating factor acetylhydrolase 1b, regulatory subunit 1 (45kDa)     |
| CYB5B    | cytochrome b5 type B (outer mitochondrial membrane)                             |
| APPBP2   | amyloid beta precursor protein (cytoplasmic tail) binding protein 2             |
| SEMA6D   | sema domain, transmembrane domain (TM), and cytoplasmic domain, (semaphorin) 6D |
| BCL11B   | B-cell CLL/lymphoma 11B (zinc finger protein)                                   |
| FRS2     | fibroblast growth factor receptor substrate 2                                   |
| PLAG1    | pleiomorphic adenoma gene 1                                                     |
| HIPK1    | homeodomain interacting protein kinase 1                                        |
| AFF4     | AF4/FMR2 family, member 4                                                       |
| CREB5    | cAMP responsive element binding protein 5                                       |
| SP1      | Sp1 transcription factor                                                        |
| BRWD1    | bromodomain and WD repeat domain containing 1                                   |
| KIAA2022 | KIAA2022                                                                        |
| ACVR2B   | activin A receptor, type IIB                                                    |
| SPRY3    | sprouty homolog 3 (Drosophila)                                                  |
| QKI      | QKI, KH domain containing, RNA binding                                          |
| AFF2     | AF4/FMR2 family, member 2                                                       |
| NFAT5    | nuclear factor of activated T-cells 5, tonicity-responsive                      |
| SLC1A2   | solute carrier family 1 (glial high affinity glutamate transporter), member 2   |
