# Supplementary material
Source: publisher figshare collection journal article supplement (https://tandf.figshare.com/articles/dataset/_/7477601)
Supplement: Supplementary file 1 [file 2 › ibmk_a_1508308_sm7121.pdf]

**Supplemental Table S5. In silico predicted targets either by mmu-miR-206-3p or -381-3p.**

| <b>TARGET_GENE</b> | <b>GENE_DESCRIPTION</b>                                                                           |
|--------------------|---------------------------------------------------------------------------------------------------|
| TP53BP1            | tumor protein p53 binding protein 1                                                               |
| WDR61              | WD repeat domain 61                                                                               |
| HSPE1              | heat shock 10kDa protein 1                                                                        |
| CEBPZ              | CCAAT/enhancer binding protein (C/EBP), zeta                                                      |
| NR1H3              | nuclear receptor subfamily 1, group H, member 3                                                   |
| NDUFAB1            | NADH dehydrogenase (ubiquinone) 1, alpha/beta subcomplex, 1, 8kDa                                 |
| MTX1               | metaxin 1                                                                                         |
| MT1H               | metallothionein 1H                                                                                |
| FGF14              | fibroblast growth factor 14                                                                       |
| MT1F               | metallothionein 1F                                                                                |
| DDIT3              | DNA-damage-inducible transcript 3                                                                 |
| MT1G               | metallothionein 1G                                                                                |
| UNC50              | unc-50 homolog (C. elegans)                                                                       |
| PIIB               | peptidylprolyl isomerase B (cyclophilin B)                                                        |
| SMARCB1            | SWI/SNF related, matrix associated, actin dependent regulator of chromatin, subfamily b, member 1 |
| PRRC2A             | Proline Rich Coiled-Coil 2A                                                                       |
| BRD7               | bromodomain containing 7                                                                          |
| LEAP2              | liver expressed antimicrobial peptide 2                                                           |
| PGD                | phosphogluconate dehydrogenase                                                                    |
| MEA1               | male-enhanced antigen 1                                                                           |
| ASPHD2             | aspartate beta-hydroxylase domain containing 2                                                    |
| ARPC1A             | actin related protein 2/3 complex, subunit 1A, 41kDa                                              |
| GH2                | growth hormone 2                                                                                  |
| GTF2B              | general transcription factor IIB                                                                  |
| DDX4               | DEAD (Asp-Glu-Ala-Asp) box polypeptide 4                                                          |
| MAPK3              | mitogen-activated protein kinase 3                                                                |
| RAB2A              | RAB2A, member RAS oncogene family                                                                 |
| HSP90B1            | heat shock protein 90kDa beta (Grp94), member 1                                                   |
| RIT2               | Ras-like without CAAX 2                                                                           |
| JUND               | jun D proto-oncogene                                                                              |
| ID1                | inhibitor of DNA binding 1, dominant negative helix-loop-helix protein                            |
| ISL2               | ISL LIM homeobox 2                                                                                |
| TKT                | transketolase                                                                                     |
| MAP4K2             | mitogen-activated protein kinase kinase kinase kinase 2                                           |
| ART3               | ADP-ribosyltransferase 3                                                                          |
| SNRNP40            | small nuclear ribonucleoprotein 40kDa (U5)                                                        |
| ANXA2              | annexin A2                                                                                        |
| CWC22              | CWC22 spliceosome-associated protein homolog (S. cerevisiae)                                      |
| SFRS9              | Serine And Arginine Rich Splicing Factor 9                                                        |
| MTFMT              | mitochondrial methionyl-tRNA formyltransferase                                                    |
| ZNF580             | zinc finger protein 580                                                                           |
| SMARCA4            | SWI/SNF related, matrix associated, actin dependent regulator of chromatin, subfamily a, member 4 |
| TMEM14C            | transmembrane protein 14C                                                                         |
| BCMO1              | beta-carotene 15,15'-monooxygenase 1                                                              |
| ANKHD1             | ankyrin repeat and KH domain containing 1                                                         |
| WIP1               | WD repeat domain, phosphoinositide interacting 1                                                  |
| CDK9               | cyclin-dependent kinase 9                                                                         |
| G6PD               | glucose-6-phosphate dehydrogenase                                                                 |
| NCL                | nucleolin                                                                                         |
| CSTA               | cystatin A (stefin A)                                                                             |

|          |                                                                                     |
|----------|-------------------------------------------------------------------------------------|
| SH3BGR13 | SH3 domain binding glutamic acid-rich protein like 3                                |
| NFKBIA   | nuclear factor of kappa light polypeptide gene enhancer in B-cells inhibitor, alpha |
| BSCL2    | Berardinelli-Seip congenital lipodystrophy 2 (seipin)                               |
| KDM5B    | Lysine Demethylase 5B                                                               |
| CEBPA    | CCAAT/enhancer binding protein (C/EBP), alpha                                       |
| SPHK2    | sphingosine kinase 2                                                                |
| TMEM243  | Transmembrane Protein 243                                                           |
| FILIP1L  | filamin A interacting protein 1-like                                                |
| KIN      | KIN, antigenic determinant of recA protein homolog (mouse)                          |
| TMSB4X   | thymosin beta 4, X-linked                                                           |
| DMPK     | dystrophin myotonia-protein kinase                                                  |
| SAMSN1   | SAM domain, SH3 domain and nuclear localization signals 1                           |
| PHKG2    | phosphorylase kinase, gamma 2 (testis)                                              |
| SLC16A3  | solute carrier family 16 (monocarboxylate transporter), member 3                    |
| GRM8     | glutamate receptor, metabotropic 8                                                  |
| XPO6     | exportin 6                                                                          |
| DHX15    | DEAH (Asp-Glu-Ala-His) box helicase 15                                              |
| MPHOSPH9 | M-phase phosphoprotein 9                                                            |
| PSMD3    | proteasome (prosome, macropain) 26S subunit, non-ATPase, 3                          |
| ELOF1    | elongation factor 1 homolog ( <i>S. cerevisiae</i> )                                |
| NASP     | nuclear autoantigenic sperm protein (histone-binding)                               |
| ASH2L    | ash2 (absent, small, or homeotic)-like ( <i>Drosophila</i> )                        |
| SLC25A1  | solute carrier family 25 (mitochondrial carrier; citrate transporter), member 1     |
| TAC1     | tachykinin, precursor 1                                                             |
| KCNA4    | potassium voltage-gated channel, shaker-related subfamily, member 4                 |
| POPDC3   | popeye domain containing 3                                                          |
| DDX5     | DEAD (Asp-Glu-Ala-Asp) box helicase 5                                               |
| NOC3L    | nucleolar complex associated 3 homolog ( <i>S. cerevisiae</i> )                     |
| SCAF8    | SR-Related CTD Associated Factor 8                                                  |
| ANXA13   | annexin A13                                                                         |
| TMSB4XP8 | Thymosin Beta 4, X-Linked Pseudogene 8                                              |
| ANP32B   | acidic (leucine-rich) nuclear phosphoprotein 32 family, member B                    |
| CPNE4    | copine IV                                                                           |
| VNN2     | vanin 2                                                                             |
| HMGN1    | high mobility group nucleosome binding domain 1                                     |
| ZBTB22   | zinc finger and BTB domain containing 22                                            |
| KTN1     | kinectin 1 (kinesin receptor)                                                       |
| TSPAN4   | tetraspanin 4                                                                       |
| TRIM63   | tripartite motif containing 63, E3 ubiquitin protein ligase                         |
| EIF2B5   | eukaryotic translation initiation factor 2B, subunit 5 epsilon, 82kDa               |
| GFRA1    | GDNF family receptor alpha 1                                                        |
| PDCD10   | programmed cell death 10                                                            |
| ARHGAP35 | Rho GTPase Activating Protein 35                                                    |
| TRAPPC3  | trafficking protein particle complex 3                                              |
| LRRC16B  | leucine rich repeat containing 16B                                                  |
| WDR6     | WD repeat domain 6                                                                  |
| MKL1     | megakaryoblastic leukemia (translocation) 1                                         |
| EN1      | engrailed homeobox 1                                                                |
| KCNA5    | potassium voltage-gated channel, shaker-related subfamily, member 5                 |
| CEP76    | centrosomal protein 76kDa                                                           |
| SNX2     | sorting nexin 2                                                                     |
| PCDH8    | protocadherin 8                                                                     |
| CYP4B1   | cytochrome P450, family 4, subfamily B, polypeptide 1                               |

|           |                                                                                          |
|-----------|------------------------------------------------------------------------------------------|
| SETBP1    | SET binding protein 1                                                                    |
| KCTD13    | potassium channel tetramerization domain containing 13                                   |
| LIP1      | lipase, member I                                                                         |
| DVL2      | dishevelled segment polarity protein 2                                                   |
| NAP1L2    | nucleosome assembly protein 1-like 2                                                     |
| BST1      | bone marrow stromal cell antigen 1                                                       |
| CALM2     | calmodulin 2 (phosphorylase kinase, delta)                                               |
| ZC2HC1C   | Zinc Finger C2HC-Type Containing 1C                                                      |
| TTC7B     | tetratricopeptide repeat domain 7B                                                       |
| KHSRP     | KH-type splicing regulatory protein                                                      |
| ZFP36     | ZFP36 ring finger protein                                                                |
| RPA1      | replication protein A1, 70kDa                                                            |
| RSBN1L    | round spermatid basic protein 1-like                                                     |
| MSANTD2   | Myb/SANT DNA Binding Domain Containing 2                                                 |
| SLC38A3   | solute carrier family 38, member 3                                                       |
| RRBP1     | ribosome binding protein 1                                                               |
| CADPS2    | Ca <sup>++</sup> -dependent secretion activator 2                                        |
| CIRBP     | cold inducible RNA binding protein                                                       |
| PHAX      | phosphorylated adaptor for RNA export                                                    |
| VBP1      | von Hippel-Lindau binding protein 1                                                      |
| ZC3H7A    | zinc finger CCCH-type containing 7A                                                      |
| AKAP12    | A kinase (PRKA) anchor protein 12                                                        |
| ACE2      | angiotensin I converting enzyme 2                                                        |
| CITED2    | Cbp/p300-interacting transactivator, with Glu/Asp-rich carboxy-terminal domain, 2        |
| USP1      | ubiquitin specific peptidase 1                                                           |
| POLA1     | polymerase (DNA directed), alpha 1, catalytic subunit                                    |
| SEC22B    | SEC22 vesicle trafficking protein homolog B ( <i>S. cerevisiae</i> ) (gene/pseudogene)   |
| EVA1C     | Eva-1 Homolog C                                                                          |
| ORC6      | Origin Recognition Complex Subunit 6                                                     |
| LMO4      | LIM domain only 4                                                                        |
| KCNJ15    | potassium inwardly-rectifying channel, subfamily J, member 15                            |
| OSBPL7    | oxysterol binding protein-like 7                                                         |
| IL15RA    | interleukin 15 receptor, alpha                                                           |
| RAP1GDS1  | RAP1, GTP-GDP dissociation stimulator 1                                                  |
| CHD4      | chromodomain helicase DNA binding protein 4                                              |
| TBP       | TATA box binding protein                                                                 |
| HNRNPD    | heterogeneous nuclear ribonucleoprotein D (AU-rich element RNA binding protein 1, 37kDa) |
| HNRNPR    | heterogeneous nuclear ribonucleoprotein R                                                |
| RNF13     | ring finger protein 13                                                                   |
| BICD1     | bicaudal D homolog 1 ( <i>Drosophila</i> )                                               |
| ANO4      | anoctamin 4                                                                              |
| FGD4      | FYVE, RhoGEF and PH domain containing 4                                                  |
| ID2       | inhibitor of DNA binding 2, dominant negative helix-loop-helix protein                   |
| TIMM8A    | translocase of inner mitochondrial membrane 8 homolog A (yeast)                          |
| LRFN1     | leucine rich repeat and fibronectin type III domain containing 1                         |
| GPR6      | G protein-coupled receptor 6                                                             |
| R3HDM2    | R3H domain containing 2                                                                  |
| RBM26     | RNA binding motif protein 26                                                             |
| DGKZ      | diacylglycerol kinase, zeta                                                              |
| LRRC17    | leucine rich repeat containing 17                                                        |
| C20ORF112 | chromosome 20 open reading frame 112                                                     |
| RAB43     | RAB43, member RAS oncogene family                                                        |
| PTGIR     | prostaglandin I2 (prostacyclin) receptor (IP)                                            |

|          |                                                                                                            |
|----------|------------------------------------------------------------------------------------------------------------|
| PRKRIR   | protein-kinase, interferon-inducible double stranded RNA dependent inhibitor, repressor of (P58 repressor) |
| FUBP1    | far upstream element (FUSE) binding protein 1                                                              |
| C10ORF12 | chromosome 10 open reading frame 12                                                                        |
| PRPF8    | pre-mRNA processing factor 8                                                                               |
| RNF40    | ring finger protein 40, E3 ubiquitin protein ligase                                                        |
| ACTG1    | actin, gamma 1                                                                                             |
| SRRM1    | serine/arginine repetitive matrix 1                                                                        |
| BET1     | Bet1 golgi vesicular membrane trafficking protein                                                          |
| EIF1     | eukaryotic translation initiation factor 1                                                                 |
| ADPGK    | ADP-dependent glucokinase                                                                                  |
| GEM      | GTP binding protein overexpressed in skeletal muscle                                                       |
| XPO7     | exportin 7                                                                                                 |
| ESM1     | endothelial cell-specific molecule 1                                                                       |
| ABHD3    | abhydrolase domain containing 3                                                                            |
| RGS7     | regulator of G-protein signaling 7                                                                         |
| TGIF1    | TGFB-induced factor homeobox 1                                                                             |
| MAB21L1  | mab-21-like 1 (C. elegans)                                                                                 |
| TMEM55B  | transmembrane protein 55B                                                                                  |
| PDAP1    | PDGFA associated protein 1                                                                                 |
| COL3A1   | collagen, type III, alpha 1                                                                                |
| SNCA     | synuclein, alpha (non A4 component of amyloid precursor)                                                   |
| VASP     | vasodilator-stimulated phosphoprotein                                                                      |
| ZNF24    | zinc finger protein 24                                                                                     |
| UBLCP1   | ubiquitin-like domain containing CTD phosphatase 1                                                         |
| VSNL1    | visinin-like 1                                                                                             |
| PTPRS    | protein tyrosine phosphatase, receptor type, S                                                             |
| MCHR1    | melanin-concentrating hormone receptor 1                                                                   |
| TEK      | TEK tyrosine kinase, endothelial                                                                           |
| ZNF281   | zinc finger protein 281                                                                                    |
| GBAS     | glioblastoma amplified sequence                                                                            |
| NCKAP1   | NCK-associated protein 1                                                                                   |
| TAGLN2   | transgelin 2                                                                                               |
| HSPD1    | heat shock 60kDa protein 1 (chaperonin)                                                                    |
| PRLR     | prolactin receptor                                                                                         |
| ZNF521   | zinc finger protein 521                                                                                    |
| ANXA4    | annexin A4                                                                                                 |
| GRK6     | G protein-coupled receptor kinase 6                                                                        |
| NKRF     | NFKB repressing factor                                                                                     |
| LRRC16A  | leucine rich repeat containing 16A                                                                         |
| GNPDA2   | glucosamine-6-phosphate deaminase 2                                                                        |
| PIAS3    | protein inhibitor of activated STAT, 3                                                                     |
| PRPS2    | phosphoribosyl pyrophosphate synthetase 2                                                                  |
| ZNF146   | zinc finger protein 146                                                                                    |
| ABHD6    | abhydrolase domain containing 6                                                                            |
| R3HDM1   | R3H domain containing 1                                                                                    |
| SOX2     | SRY (sex determining region Y)-box 2                                                                       |
| DGKH     | diacylglycerol kinase, eta                                                                                 |
| BIRC6    | baculoviral IAP repeat containing 6                                                                        |
| GDAP1L1  | ganglioside induced differentiation associated protein 1-like 1                                            |
| DCAF12   | DDB1 And CUL4 Associated Factor 12                                                                         |
| USP34    | ubiquitin specific peptidase 34                                                                            |
| C2CD5    | C2 Calcium Dependent Domain Containing 5                                                                   |
| HAND2    | heart and neural crest derivatives expressed 2                                                             |

|          |                                                                                     |
|----------|-------------------------------------------------------------------------------------|
| ANKRD23  | ankyrin repeat domain 23                                                            |
| SLC8A2   | solute carrier family 8 (sodium/calcium exchanger), member 2                        |
| VPS45    | vacuolar protein sorting 45 homolog (S. cerevisiae)                                 |
| FRK      | fyn-related kinase                                                                  |
| PDGFC    | platelet derived growth factor C                                                    |
| GAS2L1   | growth arrest-specific 2 like 1                                                     |
| TMEM178A | Transmembrane Protein 178A                                                          |
| E2F5     | E2F transcription factor 5, p130-binding                                            |
| PNRC1    | proline-rich nuclear receptor coactivator 1                                         |
| CNN3     | calponin 3, acidic                                                                  |
| KDELRL2  | KDEL (Lys-Asp-Glu-Leu) endoplasmic reticulum protein retention receptor 2           |
| HCCS     | holocytochrome c synthase                                                           |
| JAK2     | Janus kinase 2                                                                      |
| FOXF2    | forkhead box F2                                                                     |
| DLG4     | discs, large homolog 4 (Drosophila)                                                 |
| C1GALT1  | core 1 synthase, glycoprotein-N-acetylgalactosamine 3-beta-galactosyltransferase, 1 |
| YY1      | YY1 transcription factor                                                            |
| TMEM161B | transmembrane protein 161B                                                          |
| TRA2B    | Transformer 2 Beta Homolog                                                          |
| SPRY1    | sprouty homolog 1, antagonist of FGF signaling (Drosophila)                         |
| BPNT1    | 3'(2'), 5'-bisphosphate nucleotidase 1                                              |
| EIF3A    | eukaryotic translation initiation factor 3, subunit A                               |
| OTX2     | orthodenticle homeobox 2                                                            |
| LDB2     | LIM domain binding 2                                                                |
| LANCL3   | LanC lantibiotic synthetase component C-like 3 (bacterial)                          |
| PGAM1    | phosphoglycerate mutase 1 (brain)                                                   |
| RGAG1    | retrotransposon gag domain containing 1                                             |
| ZNF215   | zinc finger protein 215                                                             |
| CDC37L1  | cell division cycle 37-like 1                                                       |
| ASRGL1   | asparaginase like 1                                                                 |
| ZMAT3    | zinc finger, matrin-type 3                                                          |
| LETM1    | leucine zipper-EF-hand containing transmembrane protein 1                           |
| PPP6C    | protein phosphatase 6, catalytic subunit                                            |
| SIAH1    | siah E3 ubiquitin protein ligase 1                                                  |
| CAMLG    | calcium modulating ligand                                                           |
| FAM117A  | family with sequence similarity 117, member A                                       |
| RBM7     | RNA binding motif protein 7                                                         |
| MYO15A   | myosin XVA                                                                          |
| IL13     | interleukin 13                                                                      |
| AP3D1    | adaptor-related protein complex 3, delta 1 subunit                                  |
| CTBP2    | C-terminal binding protein 2                                                        |
| JAG2     | jagged 2                                                                            |
| TICRR    | TOPBP1 Interacting Checkpoint And Replication Regulator                             |
| PRDM12   | PR domain containing 12                                                             |
| SP2      | Sp2 transcription factor                                                            |
| WDR1     | WD repeat domain 1                                                                  |
| GALNT15  | Polypeptide N-Acetylgalactosaminyltransferase 15                                    |
| MMD2     | monocyte to macrophage differentiation-associated 2                                 |
| HOXA9    | homeobox A9                                                                         |
| GTF2I    | general transcription factor Iii                                                    |
| SNAI2    | snail family zinc finger 2                                                          |
| ZFP36L1  | ZFP36 ring finger protein-like 1                                                    |
| VAMP4    | vesicle-associated membrane protein 4                                               |

|          |                                                                                |
|----------|--------------------------------------------------------------------------------|
| TNFRSF21 | tumor necrosis factor receptor superfamily, member 21                          |
| UBAP2L   | ubiquitin associated protein 2-like                                            |
| CERS2    | Ceramide Synthase 2                                                            |
| DNAJC13  | DnaJ (Hsp40) homolog, subfamily C, member 13                                   |
| GIT1     | G protein-coupled receptor kinase interacting ArfGAP 1                         |
| HOXB4    | homeobox B4                                                                    |
| HNRNPK   | heterogeneous nuclear ribonucleoprotein K                                      |
| NUP153   | nucleoporin 153kDa                                                             |
| TNMX1    | Thioredoxin Related Transmembrane Protein 1                                    |
| SRI      | sorcin                                                                         |
| RALGAPA1 | Ral GTPase Activating Protein Catalytic Alpha Subunit 1                        |
| TERF2    | telomeric repeat binding factor 2                                              |
| GPC1     | glypican 1                                                                     |
| MAN1C1   | mannosidase, alpha, class 1C, member 1                                         |
| JPH3     | junctophilin 3                                                                 |
| UBE2E2   | ubiquitin-conjugating enzyme E2E 2                                             |
| NOTCH3   | notch 3                                                                        |
| GAS2     | growth arrest-specific 2                                                       |
| TAOK3    | TAO kinase 3                                                                   |
| CNOT1    | CCR4-NOT transcription complex, subunit 1                                      |
| LHX8     | LIM homeobox 8                                                                 |
| PMP22    | peripheral myelin protein 22                                                   |
| PDGFA    | platelet-derived growth factor alpha polypeptide                               |
| PPM1D    | protein phosphatase, Mg <sup>2+</sup> /Mn <sup>2+</sup> dependent, 1D          |
| ID4      | inhibitor of DNA binding 4, dominant negative helix-loop-helix protein         |
| SALL1    | spalt-like transcription factor 1                                              |
| LHX9     | LIM homeobox 9                                                                 |
| OTUD5    | OTU domain containing 5                                                        |
| KCNH5    | potassium voltage-gated channel, subfamily H (eag-related), member 5           |
| LRP6     | low density lipoprotein receptor-related protein 6                             |
| COL6A3   | collagen, type VI, alpha 3                                                     |
| SATB1    | SATB homeobox 1                                                                |
| RBPM5    | RNA binding protein with multiple splicing 2                                   |
| SLC25A22 | solute carrier family 25 (mitochondrial carrier: glutamate), member 22         |
| EDN1     | endothelin 1                                                                   |
| BTG1     | B-cell translocation gene 1, anti-proliferative                                |
| ARHGEF18 | Rho/Rac guanine nucleotide exchange factor (GEF) 18                            |
| CLIP3    | CAP-GLY domain containing linker protein 3                                     |
| HACE1    | HECT domain and ankyrin repeat containing E3 ubiquitin protein ligase 1        |
| PLEKHA7  | pleckstrin homology domain containing, family A member 7                       |
| EIF1AD   | eukaryotic translation initiation factor 1A domain containing                  |
| STK3     | serine/threonine kinase 3                                                      |
| SFPQ     | splicing factor proline/glutamine-rich                                         |
| CLCN3    | chloride channel, voltage-sensitive 3                                          |
| RAB5A    | RAB5A, member RAS oncogene family                                              |
| KDM5C    | Lysine Demethylase 5C                                                          |
| SLC25A25 | solute carrier family 25 (mitochondrial carrier; phosphate carrier), member 25 |
| AGPAT1   | 1-acylglycerol-3-phosphate O-acyltransferase 1                                 |
| DAP      | death-associated protein                                                       |
| KHDRBS1  | KH domain containing, RNA binding, signal transduction associated 1            |
| INSM1    | insulinoma-associated 1                                                        |
| IKBKB    | inhibitor of kappa light polypeptide gene enhancer in B-cells, kinase beta     |
| COBLL1   | cordon-bleu WH2 repeat protein-like 1                                          |

|           |                                                                    |
|-----------|--------------------------------------------------------------------|
| STAG1     | stromal antigen 1                                                  |
| SNED1     | sushi, nidogen and EGF-like domains 1                              |
| NFIA      | nuclear factor I/A                                                 |
| KPNB1     | karyopherin (importin) beta 1                                      |
| HIATL1    | hippocampus abundant transcript-like 1                             |
| SYVN1     | synovial apoptosis inhibitor 1, synoviolin                         |
| RPL22     | ribosomal protein L22                                              |
| ORC2      | Origin Recognition Complex Subunit 2                               |
| SPPL3     | Signal Peptide Peptidase Like 3                                    |
| REV3L     | REV3-like, polymerase (DNA directed), zeta, catalytic subunit      |
| CPA4      | carboxypeptidase A4                                                |
| BOLL      | boule-like RNA-binding protein                                     |
| LEF1      | lymphoid enhancer-binding factor 1                                 |
| IP6K2     | Inositol Hexakisphosphate Kinase 2                                 |
| YTHDF1    | YTH domain family, member 1                                        |
| DLD       | dihydrolipoamide dehydrogenase                                     |
| RASA1     | RAS p21 protein activator (GTPase activating protein) 1            |
| DHX40     | DEAH (Asp-Glu-Ala-His) box polypeptide 40                          |
| RSPO3     | R-spondin 3                                                        |
| TFE3      | transcription factor binding to IGHE enhancer 3                    |
| PIM1      | pim-1 oncogene                                                     |
| GTF2H1    | general transcription factor IIF, polypeptide 1, 62kDa             |
| PECAM1    | platelet/endothelial cell adhesion molecule 1                      |
| TLN2      | talin 2                                                            |
| NEUROG2   | neurogenin 2                                                       |
| MYH9      | myosin, heavy chain 9, non-muscle                                  |
| EIF4G2    | eukaryotic translation initiation factor 4 gamma, 2                |
| SLC37A3   | solute carrier family 37, member 3                                 |
| KAT6B     | Lysine Acetyltransferase 6B                                        |
| GNB1      | guanine nucleotide binding protein (G protein), beta polypeptide 1 |
| CTCF      | CCCTC-binding factor (zinc finger protein)-like                    |
| GABARAPL1 | GABA(A) receptor-associated protein like 1                         |
| AMPH      | amphiphysin                                                        |
| PLEK      | pleckstrin                                                         |
| CNOT2     | CCR4-NOT transcription complex, subunit 2                          |
| ZZZ3      | zinc finger, ZZ-type containing 3                                  |
| SLC6A8    | solute carrier family 6 (neurotransmitter transporter), member 8   |
| ZNF292    | zinc finger protein 292                                            |
| TBX3      | T-box 3                                                            |
| FAM175A   | family with sequence similarity 175, member A                      |
| MEOX2     | mesenchyme homeobox 2                                              |
| DEK       | DEK oncogene                                                       |
| ACVR1     | activin A receptor, type I                                         |
| MPZ       | myelin protein zero                                                |
| BAIAP2    | BAI1-associated protein 2                                          |
| NSF       | N-ethylmaleimide-sensitive factor                                  |
| FLI1      | Fli-1 proto-oncogene, ETS transcription factor                     |
| NCK2      | NCK adaptor protein 2                                              |
| LURAP1L   | Leucine Rich Adaptor Protein 1 Like                                |
| HIAT1     | hippocampus abundant transcript 1                                  |
| RSPO1     | R-spondin 1                                                        |
| MINK1     | misshapen-like kinase 1                                            |
| TMOD2     | tropomodulin 2 (neuronal)                                          |

|          |                                                                                        |
|----------|----------------------------------------------------------------------------------------|
| TMEM185A | transmembrane protein 185A                                                             |
| LRRC8A   | leucine rich repeat containing 8 family, member A                                      |
| SHOX2    | short stature homeobox 2                                                               |
| PSIP1    | PC4 and SFRS1 interacting protein 1                                                    |
| ERO1L    | ERO1-like ( <i>S. cerevisiae</i> )                                                     |
| GNB4     | guanine nucleotide binding protein (G protein), beta polypeptide 4                     |
| EPS8     | epidermal growth factor receptor pathway substrate 8                                   |
| SEPT9    | septin 9                                                                               |
| SIPA1L2  | signal-induced proliferation-associated 1 like 2                                       |
| ZCCHC11  | zinc finger, CCHC domain containing 11                                                 |
| ABCD3    | ATP-binding cassette, sub-family D (ALD), member 3                                     |
| ZNF532   | zinc finger protein 532                                                                |
| KCNMB2   | potassium large conductance calcium-activated channel, subfamily M, beta member 2      |
| CLCF1    | cardiotrophin-like cytokine factor 1                                                   |
| BIVM     | basic, immunoglobulin-like variable motif containing                                   |
| EPHB1    | EPH receptor B1                                                                        |
| LITAF    | lipopolysaccharide-induced TNF factor                                                  |
| SMIM14   | Small Integral Membrane Protein 14                                                     |
| LRRC4    | leucine rich repeat containing 4                                                       |
| RNF145   | ring finger protein 145                                                                |
| GPR64    | G protein-coupled receptor 64                                                          |
| SEMA3C   | sema domain, immunoglobulin domain (Ig), short basic domain, secreted, (semaphorin) 3C |
| ATP6V1B2 | ATPase, H <sup>+</sup> transporting, lysosomal 56/58kDa, V1 subunit B2                 |
| CDC73    | cell division cycle 73                                                                 |
| MAP4K3   | mitogen-activated protein kinase kinase kinase kinase 3                                |
| ANO1     | anoctamin 1, calcium activated chloride channel                                        |
| KDM2B    | Lysine Demethylase 2B                                                                  |
| TIGD6    | tigger transposable element derived 6                                                  |
| FYB      | FYN binding protein                                                                    |
| THSD7B   | thrombospondin, type I, domain containing 7B                                           |
| ZNF280D  | zinc finger protein 280D                                                               |
| KANSL1   | KAT8 Regulatory NSL Complex Subunit 1                                                  |
| ANKS1B   | ankyrin repeat and sterile alpha motif domain containing 1B                            |
| RRN3     | RRN3 RNA polymerase I transcription factor homolog ( <i>S. cerevisiae</i> )            |
| GORASP2  | golgi reassembly stacking protein 2, 55kDa                                             |
| GOLPH3   | golgi phosphoprotein 3 (coat-protein)                                                  |
| MYCN     | v-myc avian myelocytomatosis viral oncogene neuroblastoma derived homolog              |
| DPY19L4  | dpy-19-like 4 ( <i>C. elegans</i> )                                                    |
| COL11A1  | collagen, type XI, alpha 1                                                             |
| SMYD4    | SET and MYND domain containing 4                                                       |
| GCLC     | glutamate-cysteine ligase, catalytic subunit                                           |
| API5     | apoptosis inhibitor 5                                                                  |
| SEC63    | SEC63 homolog ( <i>S. cerevisiae</i> )                                                 |
| ZFPM2    | zinc finger protein, FOG family member 2                                               |
| MAP1A    | microtubule-associated protein 1A                                                      |
| ZNF217   | zinc finger protein 217                                                                |
| NADK     | NAD kinase                                                                             |
| VSIG1    | V-set and immunoglobulin domain containing 1                                           |
| GNPTAB   | N-acetylglucosamine-1-phosphate transferase, alpha and beta subunits                   |
| ZC3H14   | zinc finger CCCH-type containing 14                                                    |
| ULK2     | Unc-51 Like Autophagy Activating Kinase 2                                              |
| CHSY1    | chondroitin sulfate synthase 1                                                         |
| GAD1     | glutamate decarboxylase 1 (brain, 67kDa)                                               |

|          |                                                                                         |
|----------|-----------------------------------------------------------------------------------------|
| FBXL19   | F-box and leucine-rich repeat protein 19                                                |
| OTUD6B   | OTU domain containing 6B                                                                |
| SNAP25   | synaptosomal-associated protein, 25kDa                                                  |
| ZBTB26   | zinc finger and BTB domain containing 26                                                |
| DPP6     | dipeptidyl-peptidase 6                                                                  |
| UBE2H    | ubiquitin-conjugating enzyme E2H                                                        |
| PTK2     | protein tyrosine kinase 2                                                               |
| KIF11    | kinesin family member 11                                                                |
| EML1     | echinoderm microtubule associated protein like 1                                        |
| SEPT2    | septin 2                                                                                |
| BZRAP1   | benzodiazepine receptor (peripheral) associated protein 1                               |
| SYNCRIP  | synaptotagmin binding, cytoplasmic RNA interacting protein                              |
| RAP1A    | RAP1A, member of RAS oncogene family                                                    |
| DGKG     | diacylglycerol kinase, gamma 90kDa                                                      |
| RAC1     | ras-related C3 botulinum toxin substrate 1 (rho family, small GTP binding protein Rac1) |
| CLIP1    | CAP-GLY domain containing linker protein 1                                              |
| HBEGF    | heparin-binding EGF-like growth factor                                                  |
| CTCF     | CCCTC-binding factor (zinc finger protein)                                              |
| VAMP2    | vesicle-associated membrane protein 2 (synaptobrevin 2)                                 |
| PMPCB    | peptidase (mitochondrial processing) beta                                               |
| RPS6KA5  | ribosomal protein S6 kinase, 90kDa, polypeptide 5                                       |
| NTN4     | netrin 4                                                                                |
| ABCB7    | ATP-binding cassette, sub-family B (MDR/TAP), member 7                                  |
| ATP1B1   | ATPase, Na <sup>+</sup> /K <sup>+</sup> transporting, beta 1 polypeptide                |
| FLRT3    | fibronectin leucine rich transmembrane protein 3                                        |
| CCDC141  | coiled-coil domain containing 141                                                       |
| ZFAND3   | zinc finger, AN1-type domain 3                                                          |
| LRP8     | low density lipoprotein receptor-related protein 8, apolipoprotein e receptor           |
| PREX1    | phosphatidylinositol-3,4,5-trisphosphate-dependent Rac exchange factor 1                |
| CAP1     | CAP, adenylate cyclase-associated protein 1 (yeast)                                     |
| STK39    | serine threonine kinase 39                                                              |
| EXO1     | exonuclease 1                                                                           |
| PGM5     | phosphoglucomutase 5                                                                    |
| WSCD2    | WSC domain containing 2                                                                 |
| LZTS2    | leucine zipper, putative tumor suppressor 2                                             |
| RAB39B   | RAB39B, member RAS oncogene family                                                      |
| ATP2A2   | ATPase, Ca <sup>++</sup> transporting, cardiac muscle, slow twitch 2                    |
| ZDHHC2   | zinc finger, DHHC-type containing 2                                                     |
| HBP1     | HMG-box transcription factor 1                                                          |
| CPED1    | Cadherin Like And PC-Esterase Domain Containing 1                                       |
| HOOK3    | hook microtubule-tethering protein 3                                                    |
| PICALM   | phosphatidylinositol binding clathrin assembly protein                                  |
| GCH1     | GTP cyclohydrolase 1                                                                    |
| USP33    | ubiquitin specific peptidase 33                                                         |
| SYNJ2    | synaptojanin 2                                                                          |
| BTA1F1   | BTA1F1 RNA polymerase II, B-TFIID transcription factor-associated, 170kDa               |
| PTPN1    | protein tyrosine phosphatase, non-receptor type 1                                       |
| INSIG2   | insulin induced gene 2                                                                  |
| ANKRD29  | ankyrin repeat domain 29                                                                |
| SRSF3    | Serine And Arginine Rich Splicing Factor 3                                              |
| DENND4C  | DENN/MADD domain containing 4C                                                          |
| PPP1R14C | protein phosphatase 1, regulatory (inhibitor) subunit 14C                               |
| FUT9     | fucosyltransferase 9 (alpha (1,3) fucosyltransferase)                                   |

|          |                                                                                                                 |
|----------|-----------------------------------------------------------------------------------------------------------------|
| RAB1B    | RAB1B, member RAS oncogene family                                                                               |
| TSPYL4   | TSPY-like 4                                                                                                     |
| PTPRF    | protein tyrosine phosphatase, receptor type, F                                                                  |
| GLIS2    | GLIS family zinc finger 2                                                                                       |
| ILDR1    | immunoglobulin-like domain containing receptor 1                                                                |
| DDX52    | DEAD (Asp-Glu-Ala-Asp) box polypeptide 52                                                                       |
| KCNE1    | potassium voltage-gated channel, Isk-related family, member 1                                                   |
| CACNA1C  | calcium channel, voltage-dependent, L type, alpha 1C subunit                                                    |
| PRPF38B  | pre-mRNA processing factor 38B                                                                                  |
| TNPO2    | transportin 2                                                                                                   |
| POU4F1   | POU class 4 homeobox 1                                                                                          |
| SMAP1    | small ArfGAP 1                                                                                                  |
| SEC61A1  | Sec61 alpha 1 subunit ( <i>S. cerevisiae</i> )                                                                  |
| ELMO1    | engulfment and cell motility 1                                                                                  |
| ARHGAP24 | Rho GTPase activating protein 24                                                                                |
| FN1      | fibronectin 1                                                                                                   |
| MYH10    | myosin, heavy chain 10, non-muscle                                                                              |
| PDCD4    | programmed cell death 4 (neoplastic transformation inhibitor)                                                   |
| NCBP1    | nuclear cap binding protein subunit 1, 80kDa                                                                    |
| GNAI1    | guanine nucleotide binding protein (G protein), alpha inhibiting activity polypeptide 1                         |
| SGK3     | serum/glucocorticoid regulated kinase family, member 3                                                          |
| MS4A1    | membrane-spanning 4-domains, subfamily A, member 1                                                              |
| CDK14    | Cyclin Dependent Kinase 14                                                                                      |
| LAMC2    | laminin, gamma 2                                                                                                |
| TAF4B    | TAF4b RNA polymerase II, TATA box binding protein (TBP)-associated factor, 105kDa                               |
| YWHAQ    | tyrosine 3-monooxygenase/tryptophan 5-monooxygenase activation protein, theta polypeptide                       |
| POLDIP3  | polymerase (DNA-directed), delta interacting protein 3                                                          |
| CNOT7    | CCR4-NOT transcription complex, subunit 7                                                                       |
| UBE2D2   | ubiquitin-conjugating enzyme E2D 2                                                                              |
| RTN3     | reticulon 3                                                                                                     |
| TMEM168  | transmembrane protein 168                                                                                       |
| RPE      | ribulose-5-phosphate-3-epimerase                                                                                |
| ADAMTS3  | ADAM metalloproteinase with thrombospondin type 1 motif, 3                                                      |
| KANK4    | KN motif and ankyrin repeat domains 4                                                                           |
| RAB27A   | RAB27A, member RAS oncogene family                                                                              |
| SMARCAD1 | SWI/SNF-related, matrix-associated actin-dependent regulator of chromatin, subfamily a, containing DEAD/H box 1 |
| STAG2    | stromal antigen 2                                                                                               |
| CCDC47   | coiled-coil domain containing 47                                                                                |
| G2E3     | G2/M-Phase Specific E3 Ubiquitin Protein Ligase                                                                 |
| KATNBL1  | Katanin Regulatory Subunit B1 Like 1                                                                            |
| STARD7   | StAR-related lipid transfer (START) domain containing 7                                                         |
| XPNPEP3  | X-prolyl aminopeptidase (aminopeptidase P) 3, putative                                                          |
| HMGXB4   | HMG-Box Containing 4                                                                                            |
| ARFIP1   | ADP-ribosylation factor interacting protein 1                                                                   |
| ZNF706   | zinc finger protein 706                                                                                         |
| MUM1L1   | melanoma associated antigen (mutated) 1-like 1                                                                  |
| PHC3     | polyhomeotic homolog 3 ( <i>Drosophila</i> )                                                                    |
| SERPINB8 | serpin peptidase inhibitor, clade B (ovalbumin), member 8                                                       |
| DGKD     | diacylglycerol kinase, delta 130kDa                                                                             |
| MLLT3    | myeloid/lymphoid or mixed-lineage leukemia (trithorax homolog, <i>Drosophila</i> ); translocated to, 3          |
| TET3     | tet methylcytosine dioxygenase 3                                                                                |
| CRISPLD1 | cysteine-rich secretory protein LCCL domain containing 1                                                        |
| GTF2E1   | general transcription factor IIE, polypeptide 1, alpha 56kDa                                                    |

|          |                                                                                |
|----------|--------------------------------------------------------------------------------|
| CCBL2    | cysteine conjugate-beta lyase 2                                                |
| NXT2     | nuclear transport factor 2-like export factor 2                                |
| MEX3C    | mex-3 RNA binding family member C                                              |
| PURA     | purine-rich element binding protein A                                          |
| DDX17    | DEAD (Asp-Glu-Ala-Asp) box helicase 17                                         |
| VAT1     | vesicle amine transport 1                                                      |
| MXD4     | MAX dimerization protein 4                                                     |
| PURG     | purine-rich element binding protein G                                          |
| DNAJB2   | DnaJ (Hsp40) homolog, subfamily B, member 2                                    |
| RNF114   | ring finger protein 114                                                        |
| KIF2A    | kinesin heavy chain member 2A                                                  |
| SPTSSA   | Serine Palmitoyltransferase Small Subunit A                                    |
| TSPAN2   | tetraspanin 2                                                                  |
| SYT14L   | synaptotagmin XIV-like                                                         |
| GYPA     | glycophorin A (MNS blood group)                                                |
| SLC25A24 | solute carrier family 25 (mitochondrial carrier; phosphate carrier), member 24 |
| ZFY      | zinc finger protein, Y-linked                                                  |
| HMGCR    | 3-hydroxy-3-methylglutaryl-CoA reductase                                       |
| MAPKBP1  | mitogen-activated protein kinase binding protein 1                             |
| PLEKHO2  | pleckstrin homology domain containing, family O member 2                       |
| NET1     | neuroepithelial cell transforming 1                                            |
| CELSR3   | cadherin, EGF LAG seven-pass G-type receptor 3                                 |
| SUV420H1 | suppressor of variegation 4-20 homolog 1 (Drosophila)                          |
| DCAF10   | DDB1 And CUL4 Associated Factor 10                                             |
| PCDH7    | protocadherin 7                                                                |
| KCTD15   | potassium channel tetramerization domain containing 15                         |
| RNF2     | ring finger protein 2                                                          |
| ACSL3    | acyl-CoA synthetase long-chain family member 3                                 |
| UTRN     | utrophin                                                                       |
| KCNIP3   | Kv channel interacting protein 3, calsenilin                                   |
| FGF1     | fibroblast growth factor 1 (acidic)                                            |
| GJA1     | gap junction protein, alpha 1, 43kDa                                           |
| ARAP2    | ArfGAP with RhoGAP domain, ankyrin repeat and PH domain 2                      |
| NGFR     | nerve growth factor receptor                                                   |
| NHLH2    | nescent helix loop helix 2                                                     |
| SPEG     | SPEG complex locus                                                             |
| FNIP1    | folliculin interacting protein 1                                               |
| CYP11B1  | cytochrome P450, family 11, subfamily B, polypeptide 1                         |
| BLCAP    | bladder cancer associated protein                                              |
| C2ORF69  | chromosome 2 open reading frame 69                                             |
| FGFR2    | fibroblast growth factor receptor 2                                            |
| SRC      | v-src avian sarcoma (Schmidt-Ruppin A-2) viral oncogene homolog                |
| EML4     | echinoderm microtubule associated protein like 4                               |
| CEP44    | Centrosomal Protein 44                                                         |
| JAG1     | jagged 1                                                                       |
| WDR48    | WD repeat domain 48                                                            |
| FZD7     | frizzled family receptor 7                                                     |
| ZNF800   | zinc finger protein 800                                                        |
| ZC3H11A  | zinc finger CCCH-type containing 11A                                           |
| ETS2     | v-ets avian erythroblastosis virus E26 oncogene homolog 2                      |
| BAG4     | BCL2-associated athanogene 4                                                   |
| HS6ST2   | heparan sulfate 6-O-sulfotransferase 2                                         |
| FRYL     | FRY-like                                                                       |

|          |                                                                            |
|----------|----------------------------------------------------------------------------|
| DMRT2    | doublesex and mab-3 related transcription factor 2                         |
| CAV2     | caveolin 2                                                                 |
| FBXL3    | F-box and leucine-rich repeat protein 3                                    |
| EIF4E3   | eukaryotic translation initiation factor 4E family member 3                |
| HSPA13   | heat shock protein 70kDa family, member 13                                 |
| ADNP     | activity-dependent neuroprotector homeobox                                 |
| SKIDA1   | SKI/DACH Domain Containing 1                                               |
| GRHL1    | grainyhead-like 1 (Drosophila)                                             |
| HMGB1    | high mobility group box 1                                                  |
| GALC     | galactosylceramidase                                                       |
| WBP1L    | WW Domain Binding Protein 1 Like                                           |
| LRRK1    | leucine-rich repeat kinase 1                                               |
| CAPZA1   | capping protein (actin filament) muscle Z-line, alpha 1                    |
| NIPBL    | Nipped-B homolog (Drosophila)                                              |
| ADAMTSL3 | ADAMTS-like 3                                                              |
| INTS2    | integrator complex subunit 2                                               |
| SLC16A9  | solute carrier family 16, member 9                                         |
| ELOVL7   | ELOVL fatty acid elongase 7                                                |
| TNFSF4   | tumor necrosis factor (ligand) superfamily, member 4                       |
| PELI1    | pellino E3 ubiquitin protein ligase 1                                      |
| KCNE3    | potassium voltage-gated channel, Isk-related family, member 3              |
| ARCN1    | archain 1                                                                  |
| MMD      | monocyte to macrophage differentiation-associated                          |
| PHC2     | polyhomeotic homolog 2 (Drosophila)                                        |
| UNC119B  | unc-119 homolog B (C. elegans)                                             |
| CCDC85A  | coiled-coil domain containing 85A                                          |
| ADAM12   | ADAM metallopeptidase domain 12                                            |
| PAPOLG   | poly(A) polymerase gamma                                                   |
| THUMPD1  | THUMP domain containing 1                                                  |
| CDC42    | cell division cycle 42                                                     |
| NRF1     | nuclear respiratory factor 1                                               |
| MBTD1    | mbt domain containing 1                                                    |
| BAAT     | bile acid CoA: amino acid N-acyltransferase (glycine N-choloyltransferase) |
| GIMAP6   | GTPase, IMAP family member 6                                               |
| RPRD1B   | regulation of nuclear pre-mRNA domain containing 1B                        |
| CREBRF   | CREB3 Regulatory Factor                                                    |
| UBR3     | ubiquitin protein ligase E3 component n-recognin 3 (putative)              |
| NAALADL2 | N-acetylated alpha-linked acidic dipeptidase-like 2                        |
| C11ORF30 | chromosome 11 open reading frame 30                                        |
| KLF3     | Kruppel-like factor 3 (basic)                                              |
| TMED7    | transmembrane emp24 protein transport domain containing 7                  |
| ZIC4     | Zic family member 4                                                        |
| FBXO33   | F-box protein 33                                                           |
| HLTF     | helicase-like transcription factor                                         |
| RARB     | retinoic acid receptor, beta                                               |
| H3F3B    | H3 histone, family 3B (H3.3B)                                              |
| PTPLAD1  | protein tyrosine phosphatase-like A domain containing 1                    |
| UBQLN1   | ubiquilin 1                                                                |
| PHF21A   | PHD finger protein 21A                                                     |
| GPR137C  | G protein-coupled receptor 137C                                            |
| ACBD5    | acyl-CoA binding domain containing 5                                       |
| DNAJC5   | DnaJ (Hsp40) homolog, subfamily C, member 5                                |
| FCHSD2   | FCH and double SH3 domains 2                                               |

|          |                                                                                                           |
|----------|-----------------------------------------------------------------------------------------------------------|
| PPAP2B   | phosphatidic acid phosphatase type 2B                                                                     |
| FMNL2    | formin-like 2                                                                                             |
| PCLO     | piccolo presynaptic cytomatrix protein                                                                    |
| TXNDC5   | thioredoxin domain containing 5 (endoplasmic reticulum)                                                   |
| NDRG3    | NDRG family member 3                                                                                      |
| PCSK2    | proprotein convertase subtilisin/kexin type 2                                                             |
| HMBOX1   | homeobox containing 1                                                                                     |
| RALA     | v-ral simian leukemia viral oncogene homolog A (ras related)                                              |
| PPFIA1   | protein tyrosine phosphatase, receptor type, f polypeptide (PTPRF), interacting protein (liprin), alpha 1 |
| TMEM39A  | transmembrane protein 39A                                                                                 |
| ZBTB38   | zinc finger and BTB domain containing 38                                                                  |
| PEA15    | phosphoprotein enriched in astrocytes 15                                                                  |
| GDF6     | growth differentiation factor 6                                                                           |
| PHF2     | PHD finger protein 2                                                                                      |
| VGLL4    | vestigial like 4 (Drosophila)                                                                             |
| CHD2     | chromodomain helicase DNA binding protein 2                                                               |
| MARK1    | MAP/microtubule affinity-regulating kinase 1                                                              |
| ZIC5     | Zic family member 5                                                                                       |
| UBL3     | ubiquitin-like 3                                                                                          |
| RAPGEFL1 | Rap guanine nucleotide exchange factor (GEF)-like 1                                                       |
| NUP50    | nucleoporin 50kDa                                                                                         |
| C15ORF41 | chromosome 15 open reading frame 41                                                                       |
| C11ORF57 | chromosome 11 open reading frame 57                                                                       |
| ZC3H7B   | zinc finger CCCH-type containing 7B                                                                       |
| GOLGA1   | golgin A1                                                                                                 |
| ZBTB6    | zinc finger and BTB domain containing 6                                                                   |
| NRXN1    | neurexin 1                                                                                                |
| GXYLT1   | Glucoside Xylosyltransferase 1                                                                            |
| MAGI2    | membrane associated guanylate kinase, WW and PDZ domain containing 2                                      |
| SENP6    | SUMO1/sentrin specific peptidase 6                                                                        |
| CORO1C   | coronin, actin binding protein, 1C                                                                        |
| TNKS2    | tankyrase, TRF1-interacting ankyrin-related ADP-ribose polymerase 2                                       |
| HECW2    | HECT, C2 and WW domain containing E3 ubiquitin protein ligase 2                                           |
| ANKRD50  | ankyrin repeat domain 50                                                                                  |
| NDFIP2   | Nedd4 family interacting protein 2                                                                        |
| ARID4B   | AT rich interactive domain 4B (RBP1-like)                                                                 |
| CPEB1    | cytoplasmic polyadenylation element binding protein 1                                                     |
| IQSEC2   | IQ motif and Sec7 domain 2                                                                                |
| B4GALT6  | UDP-Gal:betaGlcNAc beta 1,4- galactosyltransferase, polypeptide 6                                         |
| ASPH     | aspartate beta-hydroxylase                                                                                |
| ST18     | suppression of tumorigenicity 18 (breast carcinoma) (zinc finger protein)                                 |
| LMBR1    | limb development membrane protein 1                                                                       |
| DMTF1    | cyclin D binding myb-like transcription factor 1                                                          |
| SPTLC3   | serine palmitoyltransferase, long chain base subunit 3                                                    |
| RP2      | retinitis pigmentosa 2 (X-linked recessive)                                                               |
| GALNT7   | UDP-N-acetyl-alpha-D-galactosamine:polypeptide N-acetylgalactosaminyltransferase 7 (GalNAc-T7)            |
| GNE      | glucosamine (UDP-N-acetyl)-2-epimerase/N-acetylmannosamine kinase                                         |
| NECAB1   | N-terminal EF-hand calcium binding protein 1                                                              |
| ZNF280C  | zinc finger protein 280C                                                                                  |
| KMT2C    | Lysine Methyltransferase 2C                                                                               |
| WDR7     | WD repeat domain 7                                                                                        |
| SSR1     | signal sequence receptor, alpha                                                                           |
| EMP1     | epithelial membrane protein 1                                                                             |

|          |                                                                         |
|----------|-------------------------------------------------------------------------|
| AIF1L    | allograft inflammatory factor 1-like                                    |
| FBXO45   | F-box protein 45                                                        |
| FBXW7    | F-box and WD repeat domain containing 7, E3 ubiquitin protein ligase    |
| JARID2   | jumonji, AT rich interactive domain 2                                   |
| CD164    | CD164 molecule, sialomucin                                              |
| DAAM1    | dishevelled associated activator of morphogenesis 1                     |
| USP15    | ubiquitin specific peptidase 15                                         |
| B3GNT5   | UDP-GlcNAc:betaGal beta-1,3-N-acetylglucosaminyltransferase 5           |
| UBE3A    | ubiquitin protein ligase E3A                                            |
| OTUB2    | OTU domain, ubiquitin aldehyde binding 2                                |
| RERE     | arginine-glutamic acid dipeptide (RE) repeats                           |
| KCTD10   | potassium channel tetramerization domain containing 10                  |
| SLC6A20  | solute carrier family 6 (proline IMINO transporter), member 20          |
| MED1     | mediator complex subunit 1                                              |
| TWF1     | twinstin actin-binding protein 1                                        |
| NLK      | nemo-like kinase                                                        |
| SMG7     | SMG7 nonsense mediated mRNA decay factor                                |
| TGFBR3   | transforming growth factor, beta receptor III                           |
| KIF3C    | kinesin family member 3C                                                |
| GNPNAT1  | glucosamine-phosphate N-acetyltransferase 1                             |
| TPPP     | tubulin polymerization promoting protein                                |
| SFRP1    | secreted frizzled-related protein 1                                     |
| ANKRD13A | ankyrin repeat domain 13A                                               |
| INSIG1   | insulin induced gene 1                                                  |
| PPP1R3B  | protein phosphatase 1, regulatory subunit 3B                            |
| FCHO2    | FCH domain only 2                                                       |
| UBXN7    | UBX domain protein 7                                                    |
| SLC10A7  | solute carrier family 10, member 7                                      |
| LASP1    | LIM and SH3 protein 1                                                   |
| THBS1    | thrombospondin 1                                                        |
| SOX5     | SRY (sex determining region Y)-box 5                                    |
| FSTL1    | follicle-stimulating-like 1                                             |
| RBPJ     | recombination signal binding protein for immunoglobulin kappa J region  |
| SPRED1   | sprouty-related, EVH1 domain containing 1                               |
| GRPEL2   | GrpE-like 2, mitochondrial (E. coli)                                    |
| POGK     | pogo transposable element with KRAB domain                              |
| FOSB     | FBJ murine osteosarcoma viral oncogene homolog B                        |
| C6ORF120 | chromosome 6 open reading frame 120                                     |
| TSPAN9   | tetraspanin 9                                                           |
| LPHN1    | latrophilin 1                                                           |
| PFN2     | profilin 2                                                              |
| KIAA0947 | KIAA0947                                                                |
| ANK3     | ankyrin 3, node of Ranvier (ankyrin G)                                  |
| DCUN1D3  | DCN1, defective in cullin neddylation 1, domain containing 3            |
| FBXO21   | F-box protein 21                                                        |
| SOX4     | SRY (sex determining region Y)-box 4                                    |
| DDX6     | DEAD (Asp-Glu-Ala-Asp) box helicase 6                                   |
| SLC24A3  | solute carrier family 24 (sodium/potassium/calcium exchanger), member 3 |
| RNF138   | ring finger protein 138, E3 ubiquitin protein ligase                    |
| OTUD7B   | OTU domain containing 7B                                                |
| CLDN1    | claudin 1                                                               |
| LRCH1    | leucine-rich repeats and calponin homology (CH) domain containing 1     |
| MYEF2    | myelin expression factor 2                                              |

|           |                                                                                          |
|-----------|------------------------------------------------------------------------------------------|
| TEF       | thyrotrophic embryonic factor                                                            |
| RAB11FIP2 | RAB11 family interacting protein 2 (class I)                                             |
| FAM102A   | family with sequence similarity 102, member A                                            |
| NRCAM     | neuronal cell adhesion molecule                                                          |
| MSL2      | male-specific lethal 2 homolog (Drosophila)                                              |
| ZBTB21    | Zinc Finger And BTB Domain Containing 21                                                 |
| MPP5      | membrane protein, palmitoylated 5 (MAGUK p55 subfamily member 5)                         |
| TRHDE     | thyrotropin-releasing hormone degrading enzyme                                           |
| MSL1      | male-specific lethal 1 homolog (Drosophila)                                              |
| TGIF2     | TGFB-induced factor homeobox 2                                                           |
| HECTD2    | HECT domain containing E3 ubiquitin protein ligase 2                                     |
| CPLX2     | complexin 2                                                                              |
| RBM24     | RNA binding motif protein 24                                                             |
| RAP2C     | RAP2C, member of RAS oncogene family                                                     |
| PPP2R2C   | protein phosphatase 2, regulatory subunit B, gamma                                       |
| JOSD1     | Josephin domain containing 1                                                             |
| STK24     | serine/threonine kinase 24                                                               |
| TBC1D4    | TBC1 domain family, member 4                                                             |
| ZNF398    | zinc finger protein 398                                                                  |
| EIF4E     | eukaryotic translation initiation factor 4E                                              |
| CCND1     | cyclin D1                                                                                |
| TMEM135   | transmembrane protein 135                                                                |
| PARD6B    | par-6 family cell polarity regulator beta                                                |
| RNF141    | ring finger protein 141                                                                  |
| FAM131B   | family with sequence similarity 131, member B                                            |
| RAPGEF2   | Rap guanine nucleotide exchange factor (GEF) 2                                           |
| STXBP5    | syntaxin binding protein 5 (tomosyn)                                                     |
| VAMP1     | vesicle-associated membrane protein 1 (synaptobrevin 1)                                  |
| ARHGEF3   | Rho guanine nucleotide exchange factor (GEF) 3                                           |
| NCOA1     | nuclear receptor coactivator 1                                                           |
| CREM      | cAMP responsive element modulator                                                        |
| MATR3     | matrin 3                                                                                 |
| PTP4A1    | protein tyrosine phosphatase type IVA, member 1                                          |
| MPP7      | membrane protein, palmitoylated 7 (MAGUK p55 subfamily member 7)                         |
| NMT2      | N-myristoyltransferase 2                                                                 |
| PAPOLA    | poly(A) polymerase alpha                                                                 |
| WNK3      | WNK lysine deficient protein kinase 3                                                    |
| SNRK      | SNF related kinase                                                                       |
| AP1S3     | adaptor-related protein complex 1, sigma 3 subunit                                       |
| SLC16A14  | solute carrier family 16, member 14                                                      |
| YWHAZ     | tyrosine 3-monooxygenase/tryptophan 5-monooxygenase activation protein, zeta polypeptide |
| GPR158    | G protein-coupled receptor 158                                                           |
| MAL2      | mal, T-cell differentiation protein 2 (gene/pseudogene)                                  |
| PDS5A     | PDS5, regulator of cohesion maintenance, homolog A (S. cerevisiae)                       |
| MRAS      | muscle RAS oncogene homolog                                                              |
| DOCK4     | dedicator of cytokinesis 4                                                               |
| STC2      | stanniocalcin 2                                                                          |
| CSNK1G3   | casein kinase 1, gamma 3                                                                 |
| SCAF11    | SR-Related CTD Associated Factor 11                                                      |
| SLC16A2   | solute carrier family 16, member 2 (thyroid hormone transporter)                         |
| SULF1     | sulfatase 1                                                                              |
| CLTC      | clathrin, heavy chain (Hc)                                                               |
| FGF7      | fibroblast growth factor 7                                                               |

|          |                                                                                                   |
|----------|---------------------------------------------------------------------------------------------------|
| CAMK2G   | calcium/calmodulin-dependent protein kinase II gamma                                              |
| LPPR4    | lipid phosphate phosphatase-related protein type 4                                                |
| NAB1     | NGFI-A binding protein 1 (EGR1 binding protein 1)                                                 |
| JPH1     | junctophilin 1                                                                                    |
| NR4A2    | nuclear receptor subfamily 4, group A, member 2                                                   |
| SLTM     | SAFB-like, transcription modulator                                                                |
| FAM160B1 | family with sequence similarity 160, member B1                                                    |
| SERP1    | stress-associated endoplasmic reticulum protein 1                                                 |
| ATP6V1A  | ATPase, H <sup>+</sup> transporting, lysosomal 70kDa, V1 subunit A                                |
| C7ORF60  | chromosome 7 open reading frame 60                                                                |
| SOX6     | SRY (sex determining region Y)-box 6                                                              |
| PARVA    | parvin, alpha                                                                                     |
| NCOA3    | nuclear receptor coactivator 3                                                                    |
| RIT1     | Ras-like without CAAX 1                                                                           |
| MID1     | midline 1 (Opitz/BBB syndrome)                                                                    |
| IGFBP5   | insulin-like growth factor binding protein 5                                                      |
| ADAR     | adenosine deaminase, RNA-specific                                                                 |
| LARP1    | La ribonucleoprotein domain family, member 1                                                      |
| RAPGEF6  | Rap guanine nucleotide exchange factor (GEF) 6                                                    |
| GAN      | gigaxonin                                                                                         |
| ZBTB5    | zinc finger and BTB domain containing 5                                                           |
| MIPOL1   | mirror-image polydactyly 1                                                                        |
| PHTF2    | putative homeodomain transcription factor 2                                                       |
| ASH1L    | ash1 (absent, small, or homeotic)-like (Drosophila)                                               |
| FAM91A1  | family with sequence similarity 91, member A1                                                     |
| CLOCK    | clock circadian regulator                                                                         |
| EBF3     | early B-cell factor 3                                                                             |
| SMARCC1  | SWI/SNF related, matrix associated, actin dependent regulator of chromatin, subfamily c, member 1 |
| MPZL1    | myelin protein zero-like 1                                                                        |
| WAPAL    | wings apart-like homolog (Drosophila)                                                             |
| LMO3     | LIM domain only 3 (rhombotin-like 2)                                                              |
| PDE5A    | phosphodiesterase 5A, cGMP-specific                                                               |
| MEGF10   | multiple EGF-like-domains 10                                                                      |
| CAP41    | Centrosomal Protein 41                                                                            |
| SLC39A10 | solute carrier family 39 (zinc transporter), member 10                                            |
| CRIM1    | cysteine rich transmembrane BMP regulator 1 (chordin-like)                                        |
| CALM1    | calmodulin 1 (phosphorylase kinase, delta)                                                        |
| SP4      | Sp4 transcription factor                                                                          |
| ITGAV    | integrin, alpha V                                                                                 |
| DDX3Y    | DEAD (Asp-Glu-Ala-Asp) box helicase 3, Y-linked                                                   |
| KCND2    | potassium voltage-gated channel, Shal-related subfamily, member 2                                 |
| RNGTT    | RNA guanylyltransferase and 5'-phosphatase                                                        |
| HNRNPU   | heterogeneous nuclear ribonucleoprotein U (scaffold attachment factor A)                          |
| HS3ST3B1 | heparan sulfate (glucosamine) 3-O-sulfotransferase 3B1                                            |
| FAF2     | Fas associated factor family member 2                                                             |
| ARMC8    | armadillo repeat containing 8                                                                     |
| MAP4     | microtubule-associated protein 4                                                                  |
| UVRAG    | UV radiation resistance associated                                                                |
| ZBTB4    | zinc finger and BTB domain containing 4                                                           |
| MED13L   | mediator complex subunit 13-like                                                                  |
| SLC2A13  | solute carrier family 2 (facilitated glucose transporter), member 13                              |
| MEIS2    | Meis homeobox 2                                                                                   |
| ADAMTSL1 | ADAMTS-like 1                                                                                     |

|         |                                                                                   |
|---------|-----------------------------------------------------------------------------------|
| SLMAP   | sarcolemma associated protein                                                     |
| KPNA3   | karyopherin alpha 3 (importin alpha 4)                                            |
| ARF3    | ADP-ribosylation factor 3                                                         |
| ARID2   | AT rich interactive domain 2 (ARID, RFX-like)                                     |
| LCOR    | ligand dependent nuclear receptor corepressor                                     |
| YTHDC1  | YTH domain containing 1                                                           |
| CXORF23 | chromosome X open reading frame 23                                                |
| GAD2    | glutamate decarboxylase 2 (pancreatic islets and brain, 65kDa)                    |
| SOC5    | suppressor of cytokine signaling 5                                                |
| EIF4G3  | eukaryotic translation initiation factor 4 gamma, 3                               |
| MIER1   | mesoderm induction early response 1, transcriptional regulator                    |
| SORBS1  | sorbin and SH3 domain containing 1                                                |
| CCSAP   | Centriole, Cilia And Spindle Associated Protein                                   |
| SYT1    | synaptotagmin I                                                                   |
| CGGBP1  | CGG triplet repeat binding protein 1                                              |
| NHS     | Nance-Horan syndrome (congenital cataracts and dental anomalies)                  |
| ANKRD12 | ankyrin repeat domain 12                                                          |
| MOB3B   | MOB Kinase Activator 3B                                                           |
| ZC3HAV1 | zinc finger CCCH-type, antiviral 1                                                |
| PDS5B   | PDS5, regulator of cohesion maintenance, homolog B (S. cerevisiae)                |
| ETF1    | eukaryotic translation termination factor 1                                       |
| VTI1A   | vesicle transport through interaction with t-SNAREs 1A                            |
| PHACTR2 | phosphatase and actin regulator 2                                                 |
| CCNT2   | cyclin T2                                                                         |
| SBF2    | SET binding factor 2                                                              |
| ATG14   | Autophagy Related 14                                                              |
| LRAT    | lecithin retinol acyltransferase (phosphatidylcholine--retinol O-acyltransferase) |
| SEC24A  | SEC24 family member A                                                             |
| ZFYVE20 | zinc finger, FYVE domain containing 20                                            |
| ROCK2   | Rho-associated, coiled-coil containing protein kinase 2                           |
| MAP3K1  | mitogen-activated protein kinase kinase kinase 1, E3 ubiquitin protein ligase     |
| FRAS1   | Fraser syndrome 1                                                                 |
| COL4A3  | collagen, type IV, alpha 3 (Goodpasture antigen)                                  |
| PUM2    | pumilio RNA-binding family member 2                                               |
| TMEM47  | transmembrane protein 47                                                          |
| SPOCK1  | sparc/osteonectin, cwcv and kazal-like domains proteoglycan (testican) 1          |
| GABBR2  | gamma-aminobutyric acid (GABA) B receptor, 2                                      |
| USP6    | ubiquitin specific peptidase 6 (Tre-2 oncogene)                                   |
| NLN     | neurolysin (metallopeptidase M3 family)                                           |
| GLCC1   | glucocorticoid induced transcript 1                                               |
| NACC2   | NACC family member 2, BEN and BTB (POZ) domain containing                         |
| CHD9    | chromodomain helicase DNA binding protein 9                                       |
| STX6    | syntaxin 6                                                                        |
| WDFY1   | WD repeat and FYVE domain containing 1                                            |
| DIO2    | deiodinase, iodothyronine, type II                                                |
| FAM155B | family with sequence similarity 155, member B                                     |
| DAG1    | dystroglycan 1 (dystrophin-associated glycoprotein 1)                             |
| DUSP3   | dual specificity phosphatase 3                                                    |
| ZNF652  | zinc finger protein 652                                                           |
| UST     | uronyl-2-sulfotransferase                                                         |
| PVRL1   | poliovirus receptor-related 1 (herpesvirus entry mediator C)                      |
| SLC8A1  | solute carrier family 8 (sodium/calcium exchanger), member 1                      |
| ITGB3   | integrin, beta 3 (platelet glycoprotein IIIa, antigen CD61)                       |

|           |                                                                |
|-----------|----------------------------------------------------------------|
| RIMS4     | regulating synaptic membrane exocytosis 4                      |
| AKAP6     | A kinase (PRKA) anchor protein 6                               |
| ITCH      | itchy E3 ubiquitin protein ligase                              |
| MMGT1     | membrane magnesium transporter 1                               |
| EYA4      | eyes absent homolog 4 (Drosophila)                             |
| NR5A2     | nuclear receptor subfamily 5, group A, member 2                |
| DICER1    | dicer 1, ribonuclease type III                                 |
| PPP2R5C   | protein phosphatase 2, regulatory subunit B', gamma            |
| GPR85     | G protein-coupled receptor 85                                  |
| TAL1      | T-cell acute lymphocytic leukemia 1                            |
| PALLD     | palladin, cytoskeletal associated protein                      |
| MAP3K7    | Mitogen-Activated Protein Kinase Kinase Kinase 7               |
| PSIP1     | PC4 And SFRS1 Interacting Protein 1                            |
| SATB2     | SATB homeobox 2                                                |
| MEIS1     | Meis homeobox 1                                                |
| ACVR2A    | activin A receptor, type IIA                                   |
| BCL7A     | B-cell CLL/lymphoma 7A                                         |
| AFF3      | AF4/FMR2 family, member 3                                      |
| SYT14     | synaptotagmin XIV                                              |
| FAM63B    | family with sequence similarity 63, member B                   |
| FNBP1L    | formin binding protein 1-like                                  |
| CTTNBP2NL | CTTNBP2 N-terminal like                                        |
| GPD2      | glycerol-3-phosphate dehydrogenase 2 (mitochondrial)           |
| SH2B3     | SH2B adaptor protein 3                                         |
| ASXL2     | additional sex combs like 2 (Drosophila)                       |
| ZNF236    | zinc finger protein 236                                        |
| ZNF148    | zinc finger protein 148                                        |
| STK38L    | serine/threonine kinase 38 like                                |
| SLC23A2   | solute carrier family 23 (ascorbic acid transporter), member 2 |
| NCOA6     | nuclear receptor coactivator 6                                 |
| DYNC1LI2  | dynein, cytoplasmic 1, light intermediate chain 2              |
| ABCA1     | ATP-binding cassette, sub-family A (ABC1), member 1            |
| EPB41L5   | erythrocyte membrane protein band 4.1 like 5                   |
| FAM135B   | family with sequence similarity 135, member B                  |
| MED13     | mediator complex subunit 13                                    |
| MON2      | MON2 homolog (S. cerevisiae)                                   |
| ZBTB39    | zinc finger and BTB domain containing 39                       |
| FBXO34    | F-box protein 34                                               |
| SEPT11    | septin 11                                                      |
| GMFB      | glia maturation factor, beta                                   |
| ZNF592    | zinc finger protein 592                                        |
| QSER1     | glutamine and serine rich 1                                    |
| GLS       | glutaminase                                                    |
| ZNF365    | zinc finger protein 365                                        |
| CNR1      | cannabinoid receptor 1 (brain)                                 |
| PCDH11Y   | protocadherin 11 Y-linked                                      |
| CD28      | CD28 molecule                                                  |
| AFAP1     | actin filament associated protein 1                            |
| OLFML2A   | olfactomedin-like 2A                                           |
| FAM178A   | family with sequence similarity 178, member A                  |
| MAP2      | microtubule-associated protein 2                               |
| OSBPL3    | oxysterol binding protein-like 3                               |
| ABL2      | c-abl oncogene 2, non-receptor tyrosine kinase                 |

|          |                                                                                            |
|----------|--------------------------------------------------------------------------------------------|
| PTGFR    | prostaglandin F receptor (FP)                                                              |
| NRP1     | neuropilin 1                                                                               |
| KMT2E    | Lysine Methyltransferase 2E                                                                |
| CREBL2   | cAMP responsive element binding protein-like 2                                             |
| PI15     | peptidase inhibitor 15                                                                     |
| CDON     | cell adhesion associated, oncogene regulated                                               |
| PPM1E    | protein phosphatase, Mg <sup>2+</sup> /Mn <sup>2+</sup> dependent, 1E                      |
| PTPRG    | protein tyrosine phosphatase, receptor type, G                                             |
| KAT6A    | Lysine Acetyltransferase 6A                                                                |
| SIX4     | SIX homeobox 4                                                                             |
| SLC7A2   | solute carrier family 7 (cationic amino acid transporter, y <sup>+</sup> system), member 2 |
| ACAP2    | ArfGAP with coiled-coil, ankyrin repeat and PH domains 2                                   |
| GRM1     | glutamate receptor, metabotropic 1                                                         |
| ATRN     | attractin                                                                                  |
| MSRB3    | methionine sulfoxide reductase B3                                                          |
| UBE2W    | ubiquitin-conjugating enzyme E2W (putative)                                                |
| CDC42BPA | CDC42 binding protein kinase alpha (DMPK-like)                                             |
| PTGS1    | prostaglandin-endoperoxide synthase 1 (prostaglandin G/H synthase and cyclooxygenase)      |
| TFEC     | transcription factor EC                                                                    |
| SPRY4    | sprouty homolog 4 (Drosophila)                                                             |
| PCDH11X  | protocadherin 11 X-linked                                                                  |
| CUL3     | cullin 3                                                                                   |
| C8ORF79  | Probable TRNA Methyltransferase 9-Like Protein                                             |
| SLC12A6  | solute carrier family 12 (potassium/chloride transporter), member 6                        |
| WIPF2    | WAS/WASL interacting protein family, member 2                                              |
| ZFX3     | zinc finger homeobox 3                                                                     |
| SH3PXD2B | SH3 and PX domains 2B                                                                      |
| WNT5A    | wingless-type MMTV integration site family, member 5A                                      |
| CPM      | carboxypeptidase M                                                                         |
| MTPN     | myotrophin                                                                                 |
| PTPRK    | protein tyrosine phosphatase, receptor type, K                                             |
| RAPGEF5  | Rap guanine nucleotide exchange factor (GEF) 5                                             |
| MYLK     | myosin light chain kinase                                                                  |
| SLC35F1  | solute carrier family 35, member F1                                                        |
| EPB41    | erythrocyte membrane protein band 4.1 (elliptocytosis 1, RH-linked)                        |
| PRRX1    | paired related homeobox 1                                                                  |
| KIF3B    | kinesin family member 3B                                                                   |
| AKAP11   | A kinase (PRKA) anchor protein 11                                                          |
| PHF6     | PHD finger protein 6                                                                       |
| MAPK1    | mitogen-activated protein kinase 1                                                         |
| DDX3X    | DEAD (Asp-Glu-Ala-Asp) box helicase 3, X-linked                                            |
| PAX3     | paired box 3                                                                               |
| BSN      | bassoon presynaptic cytomatrix protein                                                     |
| NOTCH2   | notch 2                                                                                    |
| RSBN1    | round spermatid basic protein 1                                                            |
| WDR37    | WD repeat domain 37                                                                        |
| MITF     | microphthalmia-associated transcription factor                                             |
| BTRC     | beta-transducin repeat containing E3 ubiquitin protein ligase                              |
| MIER3    | mesoderm induction early response 1, family member 3                                       |
| ABCC5    | ATP-binding cassette, sub-family C (CFTR/MRP), member 5                                    |
| CPEB4    | cytoplasmic polyadenylation element binding protein 4                                      |
| TMCC1    | transmembrane and coiled-coil domain family 1                                              |
| SLC31A1  | solute carrier family 31 (copper transporter), member 1                                    |

|          |                                                                                        |
|----------|----------------------------------------------------------------------------------------|
| CAPRIN1  | cell cycle associated protein 1                                                        |
| TIMP3    | TIMP metalloproteinase inhibitor 3                                                     |
| CPEB3    | cytoplasmic polyadenylation element binding protein 3                                  |
| RNF144A  | ring finger protein 144A                                                               |
| SEC62    | SEC62 homolog (S. cerevisiae)                                                          |
| TRIO     | trio Rho guanine nucleotide exchange factor                                            |
| LIN28A   | Lin-28 Homolog A                                                                       |
| TNPO1    | transportin 1                                                                          |
| PIKFYVE  | Phosphoinositide Kinase, FYVE-Type Zinc Finger Containing                              |
| NCAM1    | neural cell adhesion molecule 1                                                        |
| ETNK1    | ethanolamine kinase 1                                                                  |
| LPP      | LIM domain containing preferred translocation partner in lipoma                        |
| KRAS     | Kirsten rat sarcoma viral oncogene homolog                                             |
| RTKN2    | rhotekin 2                                                                             |
| ST8SIA2  | ST8 alpha-N-acetyl-neuraminide alpha-2,8-sialyltransferase 2                           |
| TRIM2    | tripartite motif containing 2                                                          |
| HIC2     | hypermethylated in cancer 2                                                            |
| AGPAT3   | 1-acylglycerol-3-phosphate O-acyltransferase 3                                         |
| GAPVD1   | GTPase activating protein and VPS9 domains 1                                           |
| MOB1B    | MOB Kinase Activator 1B                                                                |
| ATXN7L1  | ataxin 7-like 1                                                                        |
| PDE7B    | phosphodiesterase 7B                                                                   |
| MEGF9    | multiple EGF-like-domains 9                                                            |
| WDR26    | WD repeat domain 26                                                                    |
| NPTX1    | neuronal pentraxin I                                                                   |
| HDAC4    | histone deacetylase 4                                                                  |
| BCL2L2   | BCL2-like 2                                                                            |
| UBR1     | ubiquitin protein ligase E3 component n-recognin 1                                     |
| GABRB3   | gamma-aminobutyric acid (GABA) A receptor, beta 3                                      |
| RPS6KB1  | ribosomal protein S6 kinase, 70kDa, polypeptide 1                                      |
| DCBLD2   | discoidin, CUB and LCCL domain containing 2                                            |
| EDA      | ectodysplasin A                                                                        |
| BTBD7    | BTB (POZ) domain containing 7                                                          |
| SRGAP2   | SLIT-ROBO Rho GTPase activating protein 2                                              |
| FNDC3A   | fibronectin type III domain containing 3A                                              |
| NFASC    | neurofascin                                                                            |
| KCTD12   | potassium channel tetramerization domain containing 12                                 |
| C18ORF25 | chromosome 18 open reading frame 25                                                    |
| PHLPP2   | PH Domain And Leucine Rich Repeat Protein Phosphatase 2                                |
| STX16    | syntaxin 16                                                                            |
| COL19A1  | collagen, type XIX, alpha 1                                                            |
| PAN3     | PAN3 poly(A) specific ribonuclease subunit homolog (S. cerevisiae)                     |
| SHANK2   | SH3 and multiple ankyrin repeat domains 2                                              |
| KCNJ2    | potassium inwardly-rectifying channel, subfamily J, member 2                           |
| NR4A3    | nuclear receptor subfamily 4, group A, member 3                                        |
| MGAT4A   | mannosyl (alpha-1,3-)-glycoprotein beta-1,4-N-acetylglucosaminyltransferase, isozyme A |
| PCGF3    | polycomb group ring finger 3                                                           |
| FKTN     | fukutin                                                                                |
| RUNX1    | runt-related transcription factor 1                                                    |
| OTUD4    | OTU domain containing 4                                                                |
| DCP2     | decapping mRNA 2                                                                       |
| RAB6B    | RAB6B, member RAS oncogene family                                                      |
| ZFP91    | ZFP91 zinc finger protein                                                              |

|           |                                                                                    |
|-----------|------------------------------------------------------------------------------------|
| PTBP3     | Polypyrimidine Tract Binding Protein 3                                             |
| KPNA6     | karyopherin alpha 6 (importin alpha 7)                                             |
| FAM46C    | family with sequence similarity 46, member C                                       |
| MBNL2     | muscleblind-like splicing regulator 2                                              |
| KLF13     | Kruppel-like factor 13                                                             |
| JADE2     | Jade Family PHD Finger 2                                                           |
| VCPIP1    | valosin containing protein (p97)/p47 complex interacting protein 1                 |
| FOXP2     | forkhead box P2                                                                    |
| PTCH1     | patched 1                                                                          |
| RAPH1     | Ras association (RalGDS/AF-6) and pleckstrin homology domains 1                    |
| MAGI1     | membrane associated guanylate kinase, WW and PDZ domain containing 1               |
| YPEL2     | yippee-like 2 (Drosophila)                                                         |
| FNDC3B    | fibronectin type III domain containing 3B                                          |
| ATP2B4    | ATPase, Ca++ transporting, plasma membrane 4                                       |
| SNX27     | sorting nexin family member 27                                                     |
| NRP2      | neuropilin 2                                                                       |
| SLC7A6    | solute carrier family 7 (amino acid transporter light chain, y+L system), member 6 |
| AFF1      | AF4/FMR2 family, member 1                                                          |
| MBNL1     | muscleblind-like splicing regulator 1                                              |
| ZAK       | sterile alpha motif and leucine zipper containing kinase AZK                       |
| KIF1B     | kinesin family member 1B                                                           |
| RNF165    | ring finger protein 165                                                            |
| CCND2     | cyclin D2                                                                          |
| HNRNPA3   | heterogeneous nuclear ribonucleoprotein A3                                         |
| RC3H1     | ring finger and CCCH-type domains 1                                                |
| RAB11FIP4 | RAB11 family interacting protein 4 (class II)                                      |
| KALRN     | kalirin, RhoGEF kinase                                                             |
| ZBTB34    | zinc finger and BTB domain containing 34                                           |
| THRB      | thyroid hormone receptor, beta                                                     |
| RBM33     | RNA binding motif protein 33                                                       |
| FAM46A    | family with sequence similarity 46, member A                                       |
| KIAA2018  | KIAA2018                                                                           |
| ITGB8     | integrin, beta 8                                                                   |
| PLCXD3    | phosphatidylinositol-specific phospholipase C, X domain containing 3               |
| IGF1      | insulin-like growth factor 1 (somatomedin C)                                       |
| GK5       | glycerol kinase 5 (putative)                                                       |
| PPP1R9A   | protein phosphatase 1, regulatory subunit 9A                                       |
| TET2      | tet methylcytosine dioxygenase 2                                                   |
| RPS6KA3   | ribosomal protein S6 kinase, 90kDa, polypeptide 3                                  |
| SSH2      | slingshot protein phosphatase 2                                                    |
| RAB3IP    | RAB3A interacting protein                                                          |
| XIAP      | X-linked inhibitor of apoptosis                                                    |
| AP1G1     | adaptor-related protein complex 1, gamma 1 subunit                                 |
| DYRK1A    | dual-specificity tyrosine-(Y)-phosphorylation regulated kinase 1A                  |
| VPS13B    | vacuolar protein sorting 13 homolog B (yeast)                                      |
| KIAA1045  | KIAA1045                                                                           |
| SLC44A1   | solute carrier family 44 (choline transporter), member 1                           |
| HS2ST1    | heparan sulfate 2-O-sulfotransferase 1                                             |
| MTF1      | metal-regulatory transcription factor 1                                            |
| MKL2      | MKL/myocardin-like 2                                                               |
| ST8SIA3   | ST8 alpha-N-acetyl-neuraminide alpha-2,8-sialyltransferase 3                       |
| ZC3H12B   | zinc finger CCCH-type containing 12B                                               |
| IGF1R     | insulin-like growth factor 1 receptor                                              |

|         |                                                                                      |
|---------|--------------------------------------------------------------------------------------|
| CBL     | Cbl proto-oncogene, E3 ubiquitin protein ligase                                      |
| BACH2   | BTB and CNC homology 1, basic leucine zipper transcription factor 2                  |
| TPM3    | tropomyosin 3                                                                        |
| TANC2   | tetratricopeptide repeat, ankyrin repeat and coiled-coil containing 2                |
| AGO1    | Argonaute 1, RISC Catalytic Component                                                |
| ABHD2   | abhydrolase domain containing 2                                                      |
| JHDM1D  | jumonji C domain containing histone demethylase 1 homolog D ( <i>S. cerevisiae</i> ) |
| SLC5A3  | solute carrier family 5 (sodium/myo-inositol cotransporter), member 3                |
| ADCY1   | adenylate cyclase 1 (brain)                                                          |
| BMPR2   | bone morphogenetic protein receptor, type II (serine/threonine kinase)               |
| TRPS1   | trichorhinophalangeal syndrome I                                                     |
| RALGPS1 | Ral GEF with PH domain and SH3 binding motif 1                                       |
| PURB    | purine-rich element binding protein B                                                |
| IKZF2   | IKAROS family zinc finger 2 (Helios)                                                 |
| SRGAP3  | SLIT-ROBO Rho GTPase activating protein 3                                            |
| FOXP1   | forkhead box P1                                                                      |
| DLGAP2  | discs, large ( <i>Drosophila</i> ) homolog-associated protein 2                      |
| ZC3H6   | zinc finger CCCH-type containing 6                                                   |
| CSNK1G1 | casein kinase 1, gamma 1                                                             |
| TEAD1   | TEA domain family member 1 (SV40 transcriptional enhancer factor)                    |
| SOX11   | SRY (sex determining region Y)-box 11                                                |
| PGAP1   | post-GPI attachment to proteins 1                                                    |
| NFIB    | nuclear factor I/B                                                                   |
| CLCN5   | chloride channel, voltage-sensitive 5                                                |
| DCX     | doublecortin                                                                         |
| KMT2A   | Lysine Methyltransferase 2A                                                          |
| CDK6    | cyclin-dependent kinase 6                                                            |
| SH3TC2  | SH3 domain and tetratricopeptide repeats 2                                           |
| PTPRT   | protein tyrosine phosphatase, receptor type, T                                       |
| BNC2    | basonuclin 2                                                                         |
| KLF12   | Kruppel-like factor 12                                                               |
| ONECUT2 | one cut homeobox 2                                                                   |
